# Supplementary material
Source: publisher figshare collection journal article supplement (https://gsajournals.figshare.com/ndownloader/files/22537241)
Supplement: Supplementary file 1 [file 22537241]

	date	experiment	round	assay	condition	dose	control	plate	row	col	strain	trait	phenotype
1	20140310	dose	6	NA	cisplatin	0	water	3	A	1	N2	median.EXT	429.5
2	20140310	dose	6	NA	cisplatin	0	water	3	A	1	N2	median.norm.EXT	1.96988224637681
3	20140310	dose	6	NA	cisplatin	0	water	3	A	1	N2	median.TOF	184
4	20140310	dose	6	NA	cisplatin	0	water	3	A	1	N2	norm.n	218
5	20140310	dose	6	NA	cisplatin	125	water	3	A	2	N2	median.EXT	638
6	20141028	dose	9	NA	amsacrine	25	DMSO	3	A	2	N2	median.EXT	500
7	20140310	dose	6	NA	cisplatin	125	water	3	A	2	N2	median.norm.EXT	2.47112462006079
8	20141028	dose	9	NA	amsacrine	25	DMSO	3	A	2	N2	median.norm.EXT	2.08676789587852
9	20140310	dose	6	NA	cisplatin	125	water	3	A	2	N2	median.TOF	253
10	20141028	dose	9	NA	amsacrine	25	DMSO	3	A	2	N2	median.TOF	232
11	20140310	dose	6	NA	cisplatin	125	water	3	A	2	N2	norm.n	153.666666666667
12	20141028	dose	9	NA	amsacrine	25	DMSO	3	A	2	N2	norm.n	125.666666666667
13	20140310	dose	6	NA	cisplatin	250	water	3	A	3	N2	median.EXT	612.5
14	20141028	dose	9	NA	amsacrine	50	DMSO	3	A	3	N2	median.EXT	375
15	20140310	dose	6	NA	cisplatin	250	water	3	A	3	N2	median.norm.EXT	2.36442648029276
16	20141028	dose	9	NA	amsacrine	50	DMSO	3	A	3	N2	median.norm.EXT	1.86938775510204
17	20140310	dose	6	NA	cisplatin	250	water	3	A	3	N2	median.TOF	234.5
18	20141028	dose	9	NA	amsacrine	50	DMSO	3	A	3	N2	median.TOF	207
19	20140310	dose	6	NA	cisplatin	250	water	3	A	3	N2	norm.n	134
20	20141028	dose	9	NA	amsacrine	50	DMSO	3	A	3	N2	norm.n	105
21	20140310	dose	6	NA	cisplatin	500	water	3	A	4	N2	median.EXT	433
22	20141028	dose	9	NA	amsacrine	100	DMSO	3	A	4	N2	median.EXT	475.5
23	20140310	dose	6	NA	cisplatin	500	water	3	A	4	N2	median.norm.EXT	2.03260869565217
24	20141028	dose	9	NA	amsacrine	100	DMSO	3	A	4	N2	median.norm.EXT	2.20359671121552
25	20140310	dose	6	NA	cisplatin	500	water	3	A	4	N2	median.TOF	190
26	20141028	dose	9	NA	amsacrine	100	DMSO	3	A	4	N2	median.TOF	211
27	20140310	dose	6	NA	cisplatin	500	water	3	A	4	N2	norm.n	86.3333333333333
28	20141028	dose	9	NA	amsacrine	100	DMSO	3	A	4	N2	norm.n	45.3333333333333
29	20140310	dose	6	NA	cisplatin	1000	water	3	A	5	N2	median.EXT	267
30	20141028	dose	9	NA	amsacrine	200	DMSO	3	A	5	N2	median.EXT	371.5
31	20140310	dose	6	NA	cisplatin	1000	water	3	A	5	N2	median.norm.EXT	1.77623385608856
32	20141028	dose	9	NA	amsacrine	200	DMSO	3	A	5	N2	median.norm.EXT	2.50324675324675
33	20140310	dose	6	NA	cisplatin	1000	water	3	A	5	N2	median.TOF	116
34	20141028	dose	9	NA	amsacrine	200	DMSO	3	A	5	N2	median.TOF	124
35	20140310	dose	6	NA	cisplatin	1000	water	3	A	5	N2	norm.n	16
36	20141028	dose	9	NA	amsacrine	200	DMSO	3	A	5	N2	norm.n	24.6666666666667
37	20140310	dose	6	NA	cisplatin	0	water	3	A	7	CB4856	median.EXT	604.5
38	20141028	dose	9	NA	amsacrine	0	DMSO	3	A	7	CB4856	median.EXT	472.5
39	20140310	dose	6	NA	cisplatin	0	water	3	A	7	CB4856	median.norm.EXT	2.12931926751592
40	20141028	dose	9	NA	amsacrine	0	DMSO	3	A	7	CB4856	median.norm.EXT	1.94544500786851
41	20140310	dose	6	NA	cisplatin	0	water	3	A	7	CB4856	median.TOF	242
42	20141028	dose	9	NA	amsacrine	0	DMSO	3	A	7	CB4856	median.TOF	234
43	20140310	dose	6	NA	cisplatin	0	water	3	A	7	CB4856	norm.n	216
44	20141028	dose	9	NA	amsacrine	0	DMSO	3	A	7	CB4856	norm.n	132
45	20140310	dose	6	NA	cisplatin	125	water	3	A	8	CB4856	median.EXT	645
46	20141028	dose	9	NA	amsacrine	25	DMSO	3	A	8	CB4856	median.EXT	458
47	20140310	dose	6	NA	cisplatin	125	water	3	A	8	CB4856	median.norm.EXT	2.31401645537738
48	20141028	dose	9	NA	amsacrine	25	DMSO	3	A	8	CB4856	median.norm.EXT	1.91696750902527
49	20140310	dose	6	NA	cisplatin	125	water	3	A	8	CB4856	median.TOF	267.5
50	20141028	dose	9	NA	amsacrine	25	DMSO	3	A	8	CB4856	median.TOF	242
51	20140310	dose	6	NA	cisplatin	125	water	3	A	8	CB4856	norm.n	196
52	20141028	dose	9	NA	amsacrine	25	DMSO	3	A	8	CB4856	norm.n	159
53	20140310	dose	6	NA	cisplatin	250	water	3	A	9	CB4856	median.EXT	669.5
54	20141028	dose	9	NA	amsacrine	50	DMSO	3	A	9	CB4856	median.EXT	505.5
55	20140310	dose	6	NA	cisplatin	250	water	3	A	9	CB4856	median.norm.EXT	2.58751133566524
56	20141028	dose	9	NA	amsacrine	50	DMSO	3	A	9	CB4856	median.norm.EXT	2.08009906596723
57	20140310	dose	6	NA	cisplatin	250	water	3	A	9	CB4856	median.TOF	259.5
58	20141028	dose	9	NA	amsacrine	50	DMSO	3	A	9	CB4856	median.TOF	249
59	20140310	dose	6	NA	cisplatin	250	water	3	A	9	CB4856	norm.n	140.666666666667
60	20141028	dose	9	NA	amsacrine	50	DMSO	3	A	9	CB4856	norm.n	122.666666666667
61	20141028	dose	9	NA	amsacrine	100	DMSO	3	A	10	CB4856	median.EXT	397.5
62	20141028	dose	9	NA	amsacrine	100	DMSO	3	A	10	CB4856	median.norm.EXT	1.91819468571061
63	20141028	dose	9	NA	amsacrine	100	DMSO	3	A	10	CB4856	median.TOF	208
64	20141028	dose	9	NA	amsacrine	100	DMSO	3	A	10	CB4856	norm.n	107.333333333333
65	20140310	dose	6	NA	cisplatin	1000	water	3	A	11	CB4856	median.EXT	265.5
66	20141028	dose	9	NA	amsacrine	200	DMSO	3	A	11	CB4856	median.EXT	351
67	20140310	dose	6	NA	cisplatin	1000	water	3	A	11	CB4856	median.norm.EXT	2.31196213425129
68	20141028	dose	9	NA	amsacrine	200	DMSO	3	A	11	CB4856	median.norm.EXT	1.9751135790005
69	20140310	dose	6	NA	cisplatin	1000	water	3	A	11	CB4856	median.TOF	77.5
70	20141028	dose	9	NA	amsacrine	200	DMSO	3	A	11	CB4856	median.TOF	166
71	20140310	dose	6	NA	cisplatin	1000	water	3	A	11	CB4856	norm.n	5.33333333333333
72	20141028	dose	9	NA	amsacrine	200	DMSO	3	A	11	CB4856	norm.n	78.6666666666667
73	20140310	dose	6	NA	cisplatin	0	water	3	B	1	DL238	median.EXT	374
74	20141028	dose	9	NA	amsacrine	0	DMSO	3	B	1	DL238	median.EXT	548
75	20140310	dose	6	NA	cisplatin	0	water	3	B	1	DL238	median.norm.EXT	1.87847985347985
76	20141028	dose	9	NA	amsacrine	0	DMSO	3	B	1	DL238	median.norm.EXT	2.02120141342756
77	20140310	dose	6	NA	cisplatin	0	water	3	B	1	DL238	median.TOF	186
78	20141028	dose	9	NA	amsacrine	0	DMSO	3	B	1	DL238	median.TOF	261
79	20140310	dose	6	NA	cisplatin	0	water	3	B	1	DL238	norm.n	228
80	20141028	dose	9	NA	amsacrine	0	DMSO	3	B	1	DL238	norm.n	145
81	20140310	dose	6	NA	cisplatin	125	water	3	B	2	DL238	median.EXT	456
82	20141028	dose	9	NA	amsacrine	25	DMSO	3	B	2	DL238	median.EXT	550.5
83	20140310	dose	6	NA	cisplatin	125	water	3	B	2	DL238	median.norm.EXT	2.06666666666667
84	20141028	dose	9	NA	amsacrine	25	DMSO	3	B	2	DL238	median.norm.EXT	2.01019525029426
85	20140310	dose	6	NA	cisplatin	125	water	3	B	2	DL238	median.TOF	190
86	20141028	dose	9	NA	amsacrine	25	DMSO	3	B	2	DL238	median.TOF	266
87	20140310	dose	6	NA	cisplatin	125	water	3	B	2	DL238	norm.n	201.666666666667
88	20141028	dose	9	NA	amsacrine	25	DMSO	3	B	2	DL238	norm.n	131.333333333333
89	20140310	dose	6	NA	cisplatin	250	water	3	B	3	DL238	median.EXT	635
90	20141028	dose	9	NA	amsacrine	50	DMSO	3	B	3	DL238	median.EXT	561.5
91	20140310	dose	6	NA	cisplatin	250	water	3	B	3	DL238	median.norm.EXT	2.31825724461713
92	20141028	dose	9	NA	amsacrine	50	DMSO	3	B	3	DL238	median.norm.EXT	2.1578320086456
93	20140310	dose	6	NA	cisplatin	250	water	3	B	3	DL238	median.TOF	260
94	20141028	dose	9	NA	amsacrine	50	DMSO	3	B	3	DL238	median.TOF	271
95	20140310	dose	6	NA	cisplatin	250	water	3	B	3	DL238	norm.n	142
96	20141028	dose	9	NA	amsacrine	50	DMSO	3	B	3	DL238	norm.n	93.3333333333333
97	20140310	dose	6	NA	cisplatin	500	water	3	B	4	DL238	median.EXT	529.5
98	20141028	dose	9	NA	amsacrine	100	DMSO	3	B	4	DL238	median.EXT	503.5
99	20140310	dose	6	NA	cisplatin	500	water	3	B	4	DL238	median.norm.EXT	2.12847377114404
100	20141028	dose	9	NA	amsacrine	100	DMSO	3	B	4	DL238	median.norm.EXT	2.01286764705882
101	20140310	dose	6	NA	cisplatin	500	water	3	B	4	DL238	median.TOF	220.5
102	20141028	dose	9	NA	amsacrine	100	DMSO	3	B	4	DL238	median.TOF	254.5
103	20140310	dose	6	NA	cisplatin	500	water	3	B	4	DL238	norm.n	96
104	20141028	dose	9	NA	amsacrine	100	DMSO	3	B	4	DL238	norm.n	80.6666666666667
105	20140310	dose	6	NA	cisplatin	1000	water	3	B	5	DL238	median.EXT	355
106	20141028	dose	9	NA	amsacrine	200	DMSO	3	B	5	DL238	median.EXT	416
107	20140310	dose	6	NA	cisplatin	1000	water	3	B	5	DL238	median.norm.EXT	2.46619373776908
108	20141028	dose	9	NA	amsacrine	200	DMSO	3	B	5	DL238	median.norm.EXT	2.03325942350333
109	20140310	dose	6	NA	cisplatin	1000	water	3	B	5	DL238	median.TOF	113.5
110	20141028	dose	9	NA	amsacrine	200	DMSO	3	B	5	DL238	median.TOF	197
111	20140310	dose	6	NA	cisplatin	1000	water	3	B	5	DL238	norm.n	21.3333333333333
112	20141028	dose	9	NA	amsacrine	200	DMSO	3	B	5	DL238	norm.n	64.3333333333333
113	20140310	dose	6	NA	cisplatin	0	water	3	B	7	JU258	median.EXT	1162.5
114	20141028	dose	9	NA	amsacrine	0	DMSO	3	B	7	JU258	median.EXT	631.5
115	20140310	dose	6	NA	cisplatin	0	water	3	B	7	JU258	median.norm.EXT	3.37676767676768
116	20141028	dose	9	NA	amsacrine	0	DMSO	3	B	7	JU258	median.norm.EXT	2.46060240963855
117	20140310	dose	6	NA	cisplatin	0	water	3	B	7	JU258	median.TOF	340.5
118	20141028	dose	9	NA	amsacrine	0	DMSO	3	B	7	JU258	median.TOF	291
119	20140310	dose	6	NA	cisplatin	0	water	3	B	7	JU258	norm.n	160
120	20141028	dose	9	NA	amsacrine	0	DMSO	3	B	7	JU258	norm.n	102
121	20141028	dose	9	NA	amsacrine	25	DMSO	3	B	8	JU258	median.EXT	554
122	20141028	dose	9	NA	amsacrine	25	DMSO	3	B	8	JU258	median.norm.EXT	2.16418367346939
123	20141028	dose	9	NA	amsacrine	25	DMSO	3	B	8	JU258	median.TOF	255.5
124	20141028	dose	9	NA	amsacrine	25	DMSO	3	B	8	JU258	norm.n	89.3333333333333
125	20141028	dose	9	NA	amsacrine	50	DMSO	3	B	9	JU258	median.EXT	528
126	20141028	dose	9	NA	amsacrine	50	DMSO	3	B	9	JU258	median.norm.EXT	2.1844374079067
127	20141028	dose	9	NA	amsacrine	50	DMSO	3	B	9	JU258	median.TOF	245
128	20141028	dose	9	NA	amsacrine	50	DMSO	3	B	9	JU258	norm.n	110
129	20140310	dose	6	NA	cisplatin	500	water	3	B	10	JU258	median.EXT	233.5
130	20141028	dose	9	NA	amsacrine	100	DMSO	3	B	10	JU258	median.EXT	429
131	20140310	dose	6	NA	cisplatin	500	water	3	B	10	JU258	median.norm.EXT	1.50869134170522
132	20141028	dose	9	NA	amsacrine	100	DMSO	3	B	10	JU258	median.norm.EXT	2.20789473684211
133	20140310	dose	6	NA	cisplatin	500	water	3	B	10	JU258	median.TOF	125.5
134	20141028	dose	9	NA	amsacrine	100	DMSO	3	B	10	JU258	median.TOF	212
135	20140310	dose	6	NA	cisplatin	500	water	3	B	10	JU258	norm.n	48
136	20141028	dose	9	NA	amsacrine	100	DMSO	3	B	10	JU258	norm.n	45.6666666666667
137	20140310	dose	6	NA	cisplatin	1000	water	3	B	11	JU258	median.EXT	153
138	20141028	dose	9	NA	amsacrine	200	DMSO	3	B	11	JU258	median.EXT	406
139	20140310	dose	6	NA	cisplatin	1000	water	3	B	11	JU258	median.norm.EXT	1.77777777777778
140	20141028	dose	9	NA	amsacrine	200	DMSO	3	B	11	JU258	median.norm.EXT	2.49180327868852
141	20140310	dose	6	NA	cisplatin	1000	water	3	B	11	JU258	median.TOF	104
142	20141028	dose	9	NA	amsacrine	200	DMSO	3	B	11	JU258	median.TOF	180
143	20140310	dose	6	NA	cisplatin	1000	water	3	B	11	JU258	norm.n	13
144	20141028	dose	9	NA	amsacrine	200	DMSO	3	B	11	JU258	norm.n	39
145	20140310	dose	6	NA	cisplatin	0	water	3	C	1	DL238	median.EXT	453
146	20141028	dose	9	NA	amsacrine	0	DMSO	3	C	1	DL238	median.EXT	571
147	20140310	dose	6	NA	cisplatin	0	water	3	C	1	DL238	median.norm.EXT	2.00177304964539
148	20141028	dose	9	NA	amsacrine	0	DMSO	3	C	1	DL238	median.norm.EXT	1.99447816334609
149	20140310	dose	6	NA	cisplatin	0	water	3	C	1	DL238	median.TOF	190
150	20141028	dose	9	NA	amsacrine	0	DMSO	3	C	1	DL238	median.TOF	290.5
151	20140310	dose	6	NA	cisplatin	0	water	3	C	1	DL238	norm.n	227.333333333333
152	20141028	dose	9	NA	amsacrine	0	DMSO	3	C	1	DL238	norm.n	126
153	20140310	dose	6	NA	cisplatin	125	water	3	C	2	DL238	median.EXT	582
154	20141028	dose	9	NA	amsacrine	25	DMSO	3	C	2	DL238	median.EXT	582
155	20140310	dose	6	NA	cisplatin	125	water	3	C	2	DL238	median.norm.EXT	2.26075757575758
156	20141028	dose	9	NA	amsacrine	25	DMSO	3	C	2	DL238	median.norm.EXT	2.05882352941176
157	20140310	dose	6	NA	cisplatin	125	water	3	C	2	DL238	median.TOF	220
158	20141028	dose	9	NA	amsacrine	25	DMSO	3	C	2	DL238	median.TOF	286
159	20140310	dose	6	NA	cisplatin	125	water	3	C	2	DL238	norm.n	134
160	20141028	dose	9	NA	amsacrine	25	DMSO	3	C	2	DL238	norm.n	115.666666666667
161	20140310	dose	6	NA	cisplatin	250	water	3	C	3	DL238	median.EXT	651.5
162	20141028	dose	9	NA	amsacrine	50	DMSO	3	C	3	DL238	median.EXT	604
163	20140310	dose	6	NA	cisplatin	250	water	3	C	3	DL238	median.norm.EXT	2.29968366943456
164	20141028	dose	9	NA	amsacrine	50	DMSO	3	C	3	DL238	median.norm.EXT	2.10778443113772
165	20140310	dose	6	NA	cisplatin	250	water	3	C	3	DL238	median.TOF	254.5
166	20141028	dose	9	NA	amsacrine	50	DMSO	3	C	3	DL238	median.TOF	275
167	20140310	dose	6	NA	cisplatin	250	water	3	C	3	DL238	norm.n	121.333333333333
168	20141028	dose	9	NA	amsacrine	50	DMSO	3	C	3	DL238	norm.n	87.6666666666667
169	20140310	dose	6	NA	cisplatin	500	water	3	C	4	DL238	median.EXT	538.5
170	20141028	dose	9	NA	amsacrine	100	DMSO	3	C	4	DL238	median.EXT	587
171	20140310	dose	6	NA	cisplatin	500	water	3	C	4	DL238	median.norm.EXT	2.08394173973658
172	20141028	dose	9	NA	amsacrine	100	DMSO	3	C	4	DL238	median.norm.EXT	2.05
173	20140310	dose	6	NA	cisplatin	500	water	3	C	4	DL238	median.TOF	244.5
174	20141028	dose	9	NA	amsacrine	100	DMSO	3	C	4	DL238	median.TOF	283
175	20140310	dose	6	NA	cisplatin	500	water	3	C	4	DL238	norm.n	84.6666666666667
176	20141028	dose	9	NA	amsacrine	100	DMSO	3	C	4	DL238	norm.n	87.6666666666667
177	20140310	dose	6	NA	cisplatin	1000	water	3	C	5	DL238	median.EXT	157
178	20141028	dose	9	NA	amsacrine	200	DMSO	3	C	5	DL238	median.EXT	377
179	20140310	dose	6	NA	cisplatin	1000	water	3	C	5	DL238	median.norm.EXT	1.57593201754386
180	20141028	dose	9	NA	amsacrine	200	DMSO	3	C	5	DL238	median.norm.EXT	1.94076655052265
181	20140310	dose	6	NA	cisplatin	1000	water	3	C	5	DL238	median.TOF	98.5
182	20141028	dose	9	NA	amsacrine	200	DMSO	3	C	5	DL238	median.TOF	177
183	20140310	dose	6	NA	cisplatin	1000	water	3	C	5	DL238	norm.n	31.3333333333333
184	20141028	dose	9	NA	amsacrine	200	DMSO	3	C	5	DL238	norm.n	78.3333333333333
185	20140310	dose	6	NA	cisplatin	0	water	3	C	7	N2	median.EXT	544
186	20141028	dose	9	NA	amsacrine	0	DMSO	3	C	7	N2	median.EXT	576
187	20140310	dose	6	NA	cisplatin	0	water	3	C	7	N2	median.norm.EXT	2.16742081447964
188	20141028	dose	9	NA	amsacrine	0	DMSO	3	C	7	N2	median.norm.EXT	2.14538043478261
189	20140310	dose	6	NA	cisplatin	0	water	3	C	7	N2	median.TOF	215
190	20141028	dose	9	NA	amsacrine	0	DMSO	3	C	7	N2	median.TOF	287
191	20140310	dose	6	NA	cisplatin	0	water	3	C	7	N2	norm.n	191.666666666667
192	20141028	dose	9	NA	amsacrine	0	DMSO	3	C	7	N2	norm.n	130.666666666667
193	20140310	dose	6	NA	cisplatin	125	water	3	C	8	N2	median.EXT	659.5
194	20141028	dose	9	NA	amsacrine	25	DMSO	3	C	8	N2	median.EXT	539
195	20140310	dose	6	NA	cisplatin	125	water	3	C	8	N2	median.norm.EXT	2.34983964891552
196	20141028	dose	9	NA	amsacrine	25	DMSO	3	C	8	N2	median.norm.EXT	2.04651162790698
197	20140310	dose	6	NA	cisplatin	125	water	3	C	8	N2	median.TOF	270
198	20141028	dose	9	NA	amsacrine	25	DMSO	3	C	8	N2	median.TOF	263
199	20140310	dose	6	NA	cisplatin	125	water	3	C	8	N2	norm.n	162
200	20141028	dose	9	NA	amsacrine	25	DMSO	3	C	8	N2	norm.n	115
201	20140310	dose	6	NA	cisplatin	250	water	3	C	9	N2	median.EXT	647.5
202	20141028	dose	9	NA	amsacrine	50	DMSO	3	C	9	N2	median.EXT	414
203	20140310	dose	6	NA	cisplatin	250	water	3	C	9	N2	median.norm.EXT	2.59057766367137
204	20141028	dose	9	NA	amsacrine	50	DMSO	3	C	9	N2	median.norm.EXT	1.85416666666667
205	20140310	dose	6	NA	cisplatin	250	water	3	C	9	N2	median.TOF	256
206	20141028	dose	9	NA	amsacrine	50	DMSO	3	C	9	N2	median.TOF	224
207	20140310	dose	6	NA	cisplatin	250	water	3	C	9	N2	norm.n	122
208	20141028	dose	9	NA	amsacrine	50	DMSO	3	C	9	N2	norm.n	81
209	20140310	dose	6	NA	cisplatin	500	water	3	C	10	N2	median.EXT	357.5
210	20141028	dose	9	NA	amsacrine	100	DMSO	3	C	10	N2	median.EXT	340
211	20140310	dose	6	NA	cisplatin	500	water	3	C	10	N2	median.norm.EXT	1.91458264154076
212	20141028	dose	9	NA	amsacrine	100	DMSO	3	C	10	N2	median.norm.EXT	1.71278640059128
213	20140310	dose	6	NA	cisplatin	500	water	3	C	10	N2	median.TOF	182.5
214	20141028	dose	9	NA	amsacrine	100	DMSO	3	C	10	N2	median.TOF	189
215	20140310	dose	6	NA	cisplatin	500	water	3	C	10	N2	norm.n	64
216	20141028	dose	9	NA	amsacrine	100	DMSO	3	C	10	N2	norm.n	48
217	20140310	dose	6	NA	cisplatin	1000	water	3	C	11	N2	median.EXT	289.5
218	20141028	dose	9	NA	amsacrine	200	DMSO	3	C	11	N2	median.EXT	197
219	20140310	dose	6	NA	cisplatin	1000	water	3	C	11	N2	median.norm.EXT	2.40593350130922
220	20141028	dose	9	NA	amsacrine	200	DMSO	3	C	11	N2	median.norm.EXT	1.56834457706279
221	20140310	dose	6	NA	cisplatin	1000	water	3	C	11	N2	median.TOF	109
222	20141028	dose	9	NA	amsacrine	200	DMSO	3	C	11	N2	median.TOF	131.5
223	20140310	dose	6	NA	cisplatin	1000	water	3	C	11	N2	norm.n	13.3333333333333
224	20141028	dose	9	NA	amsacrine	200	DMSO	3	C	11	N2	norm.n	28.6666666666667
225	20141028	dose	9	NA	amsacrine	0	DMSO	3	D	1	JU258	median.EXT	1073
226	20141028	dose	9	NA	amsacrine	0	DMSO	3	D	1	JU258	median.norm.EXT	2.82862903225806
227	20141028	dose	9	NA	amsacrine	0	DMSO	3	D	1	JU258	median.TOF	342
228	20141028	dose	9	NA	amsacrine	0	DMSO	3	D	1	JU258	norm.n	87.6666666666667
229	20140310	dose	6	NA	cisplatin	125	water	3	D	2	JU258	median.EXT	782
230	20141028	dose	9	NA	amsacrine	25	DMSO	3	D	2	JU258	median.EXT	665
231	20140310	dose	6	NA	cisplatin	125	water	3	D	2	JU258	median.norm.EXT	3.05150214592275
232	20141028	dose	9	NA	amsacrine	25	DMSO	3	D	2	JU258	median.norm.EXT	2.36450839328537
233	20140310	dose	6	NA	cisplatin	125	water	3	D	2	JU258	median.TOF	274
234	20141028	dose	9	NA	amsacrine	25	DMSO	3	D	2	JU258	median.TOF	295
235	20140310	dose	6	NA	cisplatin	125	water	3	D	2	JU258	norm.n	145
236	20141028	dose	9	NA	amsacrine	25	DMSO	3	D	2	JU258	norm.n	94.3333333333333
237	20140310	dose	6	NA	cisplatin	250	water	3	D	3	JU258	median.EXT	562
238	20141028	dose	9	NA	amsacrine	50	DMSO	3	D	3	JU258	median.EXT	595.5
239	20140310	dose	6	NA	cisplatin	250	water	3	D	3	JU258	median.norm.EXT	2.26187273246097
240	20141028	dose	9	NA	amsacrine	50	DMSO	3	D	3	JU258	median.norm.EXT	2.33004658385093
241	20140310	dose	6	NA	cisplatin	250	water	3	D	3	JU258	median.TOF	231.5
242	20141028	dose	9	NA	amsacrine	50	DMSO	3	D	3	JU258	median.TOF	275
243	20140310	dose	6	NA	cisplatin	250	water	3	D	3	JU258	norm.n	101.333333333333
244	20141028	dose	9	NA	amsacrine	50	DMSO	3	D	3	JU258	norm.n	78
245	20140310	dose	6	NA	cisplatin	500	water	3	D	4	JU258	median.EXT	262.5
246	20141028	dose	9	NA	amsacrine	100	DMSO	3	D	4	JU258	median.EXT	493.5
247	20140310	dose	6	NA	cisplatin	500	water	3	D	4	JU258	median.norm.EXT	1.87239710518137
248	20141028	dose	9	NA	amsacrine	100	DMSO	3	D	4	JU258	median.norm.EXT	2.27691916741747
249	20140310	dose	6	NA	cisplatin	500	water	3	D	4	JU258	median.TOF	148
250	20141028	dose	9	NA	amsacrine	100	DMSO	3	D	4	JU258	median.TOF	228.5
251	20140310	dose	6	NA	cisplatin	500	water	3	D	4	JU258	norm.n	106
252	20141028	dose	9	NA	amsacrine	100	DMSO	3	D	4	JU258	norm.n	55.3333333333333
253	20141028	dose	9	NA	amsacrine	200	DMSO	3	D	5	JU258	median.EXT	297
254	20141028	dose	9	NA	amsacrine	200	DMSO	3	D	5	JU258	median.norm.EXT	2.21974362196808
255	20141028	dose	9	NA	amsacrine	200	DMSO	3	D	5	JU258	median.TOF	125.5
256	20141028	dose	9	NA	amsacrine	200	DMSO	3	D	5	JU258	norm.n	35.3333333333333
257	20140310	dose	6	NA	cisplatin	0	water	3	D	7	CB4856	median.EXT	656
258	20141028	dose	9	NA	amsacrine	0	DMSO	3	D	7	CB4856	median.EXT	664
259	20140310	dose	6	NA	cisplatin	0	water	3	D	7	CB4856	median.norm.EXT	2.30968978937729
260	20141028	dose	9	NA	amsacrine	0	DMSO	3	D	7	CB4856	median.norm.EXT	2.26136363636364
261	20140310	dose	6	NA	cisplatin	0	water	3	D	7	CB4856	median.TOF	278
262	20141028	dose	9	NA	amsacrine	0	DMSO	3	D	7	CB4856	median.TOF	298
263	20140310	dose	6	NA	cisplatin	0	water	3	D	7	CB4856	norm.n	194.666666666667
264	20141028	dose	9	NA	amsacrine	0	DMSO	3	D	7	CB4856	norm.n	99.6666666666667
265	20140310	dose	6	NA	cisplatin	125	water	3	D	8	CB4856	median.EXT	659
266	20141028	dose	9	NA	amsacrine	25	DMSO	3	D	8	CB4856	median.EXT	590
267	20140310	dose	6	NA	cisplatin	125	water	3	D	8	CB4856	median.norm.EXT	2.3113120430935
268	20141028	dose	9	NA	amsacrine	25	DMSO	3	D	8	CB4856	median.norm.EXT	2.04878048780488
269	20140310	dose	6	NA	cisplatin	125	water	3	D	8	CB4856	median.TOF	265.5
270	20141028	dose	9	NA	amsacrine	25	DMSO	3	D	8	CB4856	median.TOF	281
271	20140310	dose	6	NA	cisplatin	125	water	3	D	8	CB4856	norm.n	204
272	20141028	dose	9	NA	amsacrine	25	DMSO	3	D	8	CB4856	norm.n	121
273	20140310	dose	6	NA	cisplatin	250	water	3	D	9	CB4856	median.EXT	719
274	20141028	dose	9	NA	amsacrine	50	DMSO	3	D	9	CB4856	median.EXT	636.5
275	20140310	dose	6	NA	cisplatin	250	water	3	D	9	CB4856	median.norm.EXT	2.73532828282828
276	20141028	dose	9	NA	amsacrine	50	DMSO	3	D	9	CB4856	median.norm.EXT	2.13249195984797
277	20140310	dose	6	NA	cisplatin	250	water	3	D	9	CB4856	median.TOF	289.5
278	20141028	dose	9	NA	amsacrine	50	DMSO	3	D	9	CB4856	median.TOF	297
279	20140310	dose	6	NA	cisplatin	250	water	3	D	9	CB4856	norm.n	159
280	20141028	dose	9	NA	amsacrine	50	DMSO	3	D	9	CB4856	norm.n	108
281	20141028	dose	9	NA	amsacrine	100	DMSO	3	D	10	CB4856	median.EXT	315.5
282	20141028	dose	9	NA	amsacrine	100	DMSO	3	D	10	CB4856	median.norm.EXT	1.81548549591801
283	20141028	dose	9	NA	amsacrine	100	DMSO	3	D	10	CB4856	median.TOF	190
284	20141028	dose	9	NA	amsacrine	100	DMSO	3	D	10	CB4856	norm.n	74.6666666666667
285	20140310	dose	6	NA	cisplatin	1000	water	3	D	11	CB4856	median.EXT	311
286	20141028	dose	9	NA	amsacrine	200	DMSO	3	D	11	CB4856	median.EXT	273
287	20140310	dose	6	NA	cisplatin	1000	water	3	D	11	CB4856	median.norm.EXT	1.79551122194514
288	20141028	dose	9	NA	amsacrine	200	DMSO	3	D	11	CB4856	median.norm.EXT	1.83455882352941
289	20140310	dose	6	NA	cisplatin	1000	water	3	D	11	CB4856	median.TOF	94
290	20141028	dose	9	NA	amsacrine	200	DMSO	3	D	11	CB4856	median.TOF	152
291	20140310	dose	6	NA	cisplatin	1000	water	3	D	11	CB4856	norm.n	12.3333333333333
292	20141028	dose	9	NA	amsacrine	200	DMSO	3	D	11	CB4856	norm.n	57
293	20141028	dose	9	NA	amsacrine	0	DMSO	3	E	1	JU258	median.EXT	754
294	20141028	dose	9	NA	amsacrine	0	DMSO	3	E	1	JU258	median.norm.EXT	2.4147465437788
295	20141028	dose	9	NA	amsacrine	0	DMSO	3	E	1	JU258	median.TOF	296
296	20141028	dose	9	NA	amsacrine	0	DMSO	3	E	1	JU258	norm.n	97
297	20140310	dose	6	NA	cisplatin	125	water	3	E	2	JU258	median.EXT	765.5
298	20141028	dose	9	NA	amsacrine	25	DMSO	3	E	2	JU258	median.EXT	601
299	20140310	dose	6	NA	cisplatin	125	water	3	E	2	JU258	median.norm.EXT	2.93051724137931
300	20141028	dose	9	NA	amsacrine	25	DMSO	3	E	2	JU258	median.norm.EXT	2.28960573476702
301	20140310	dose	6	NA	cisplatin	125	water	3	E	2	JU258	median.TOF	251
302	20141028	dose	9	NA	amsacrine	25	DMSO	3	E	2	JU258	median.TOF	270.5
303	20140310	dose	6	NA	cisplatin	125	water	3	E	2	JU258	norm.n	198
304	20141028	dose	9	NA	amsacrine	25	DMSO	3	E	2	JU258	norm.n	109.333333333333
305	20140310	dose	6	NA	cisplatin	250	water	3	E	3	JU258	median.EXT	510.5
306	20141028	dose	9	NA	amsacrine	50	DMSO	3	E	3	JU258	median.EXT	565
307	20140310	dose	6	NA	cisplatin	250	water	3	E	3	JU258	median.norm.EXT	2.33185483870968
308	20141028	dose	9	NA	amsacrine	50	DMSO	3	E	3	JU258	median.norm.EXT	2.17785234899329
309	20140310	dose	6	NA	cisplatin	250	water	3	E	3	JU258	median.TOF	226
310	20141028	dose	9	NA	amsacrine	50	DMSO	3	E	3	JU258	median.TOF	260
311	20140310	dose	6	NA	cisplatin	250	water	3	E	3	JU258	norm.n	148
312	20141028	dose	9	NA	amsacrine	50	DMSO	3	E	3	JU258	norm.n	102.333333333333
313	20140310	dose	6	NA	cisplatin	500	water	3	E	4	JU258	median.EXT	267
314	20141028	dose	9	NA	amsacrine	100	DMSO	3	E	4	JU258	median.EXT	478.5
315	20140310	dose	6	NA	cisplatin	500	water	3	E	4	JU258	median.norm.EXT	1.6375
316	20141028	dose	9	NA	amsacrine	100	DMSO	3	E	4	JU258	median.norm.EXT	2.3775171624714
317	20140310	dose	6	NA	cisplatin	500	water	3	E	4	JU258	median.TOF	155
318	20141028	dose	9	NA	amsacrine	100	DMSO	3	E	4	JU258	median.TOF	215
319	20140310	dose	6	NA	cisplatin	500	water	3	E	4	JU258	norm.n	63.6666666666667
320	20141028	dose	9	NA	amsacrine	100	DMSO	3	E	4	JU258	norm.n	63.3333333333333
321	20140310	dose	6	NA	cisplatin	1000	water	3	E	5	JU258	median.EXT	227
322	20141028	dose	9	NA	amsacrine	200	DMSO	3	E	5	JU258	median.EXT	315
323	20140310	dose	6	NA	cisplatin	1000	water	3	E	5	JU258	median.norm.EXT	1.5672514619883
324	20141028	dose	9	NA	amsacrine	200	DMSO	3	E	5	JU258	median.norm.EXT	2.79440199962271
325	20140310	dose	6	NA	cisplatin	1000	water	3	E	5	JU258	median.TOF	103
326	20141028	dose	9	NA	amsacrine	200	DMSO	3	E	5	JU258	median.TOF	103.5
327	20140310	dose	6	NA	cisplatin	1000	water	3	E	5	JU258	norm.n	21
328	20141028	dose	9	NA	amsacrine	200	DMSO	3	E	5	JU258	norm.n	29.3333333333333
329	20140310	dose	6	NA	cisplatin	0	water	3	E	7	DL238	median.EXT	413
330	20141028	dose	9	NA	amsacrine	0	DMSO	3	E	7	DL238	median.EXT	537
331	20140310	dose	6	NA	cisplatin	0	water	3	E	7	DL238	median.norm.EXT	1.98895197176615
332	20141028	dose	9	NA	amsacrine	0	DMSO	3	E	7	DL238	median.norm.EXT	1.95092357362126
333	20140310	dose	6	NA	cisplatin	0	water	3	E	7	DL238	median.TOF	180
334	20141028	dose	9	NA	amsacrine	0	DMSO	3	E	7	DL238	median.TOF	276.5
335	20140310	dose	6	NA	cisplatin	0	water	3	E	7	DL238	norm.n	226.666666666667
336	20141028	dose	9	NA	amsacrine	0	DMSO	3	E	7	DL238	norm.n	130
337	20140310	dose	6	NA	cisplatin	125	water	3	E	8	DL238	median.EXT	570
338	20141028	dose	9	NA	amsacrine	25	DMSO	3	E	8	DL238	median.EXT	591.5
339	20140310	dose	6	NA	cisplatin	125	water	3	E	8	DL238	median.norm.EXT	2.1319018404908
340	20141028	dose	9	NA	amsacrine	25	DMSO	3	E	8	DL238	median.norm.EXT	2.06312302839117
341	20140310	dose	6	NA	cisplatin	125	water	3	E	8	DL238	median.TOF	225
342	20141028	dose	9	NA	amsacrine	25	DMSO	3	E	8	DL238	median.TOF	290.5
343	20140310	dose	6	NA	cisplatin	125	water	3	E	8	DL238	norm.n	166.333333333333
344	20141028	dose	9	NA	amsacrine	25	DMSO	3	E	8	DL238	norm.n	105.333333333333
345	20140310	dose	6	NA	cisplatin	250	water	3	E	9	DL238	median.EXT	569
346	20141028	dose	9	NA	amsacrine	50	DMSO	3	E	9	DL238	median.EXT	545
347	20140310	dose	6	NA	cisplatin	250	water	3	E	9	DL238	median.norm.EXT	2.20983337650004
348	20141028	dose	9	NA	amsacrine	50	DMSO	3	E	9	DL238	median.norm.EXT	2.03503184713376
349	20140310	dose	6	NA	cisplatin	250	water	3	E	9	DL238	median.TOF	221
350	20141028	dose	9	NA	amsacrine	50	DMSO	3	E	9	DL238	median.TOF	275
351	20140310	dose	6	NA	cisplatin	250	water	3	E	9	DL238	norm.n	180.666666666667
352	20141028	dose	9	NA	amsacrine	50	DMSO	3	E	9	DL238	norm.n	97.6666666666667
353	20140310	dose	6	NA	cisplatin	500	water	3	E	10	DL238	median.EXT	468.5
354	20141028	dose	9	NA	amsacrine	100	DMSO	3	E	10	DL238	median.EXT	471
355	20140310	dose	6	NA	cisplatin	500	water	3	E	10	DL238	median.norm.EXT	2.04476963199073
356	20141028	dose	9	NA	amsacrine	100	DMSO	3	E	10	DL238	median.norm.EXT	1.8754386829046
357	20140310	dose	6	NA	cisplatin	500	water	3	E	10	DL238	median.TOF	206.5
358	20141028	dose	9	NA	amsacrine	100	DMSO	3	E	10	DL238	median.TOF	254
359	20140310	dose	6	NA	cisplatin	500	water	3	E	10	DL238	norm.n	64.6666666666667
360	20141028	dose	9	NA	amsacrine	100	DMSO	3	E	10	DL238	norm.n	136.666666666667
361	20140310	dose	6	NA	cisplatin	1000	water	3	E	11	DL238	median.EXT	259
362	20141028	dose	9	NA	amsacrine	200	DMSO	3	E	11	DL238	median.EXT	445
363	20140310	dose	6	NA	cisplatin	1000	water	3	E	11	DL238	median.norm.EXT	2.33033033033033
364	20141028	dose	9	NA	amsacrine	200	DMSO	3	E	11	DL238	median.norm.EXT	1.89258241758242
365	20140310	dose	6	NA	cisplatin	1000	water	3	E	11	DL238	median.TOF	114
366	20141028	dose	9	NA	amsacrine	200	DMSO	3	E	11	DL238	median.TOF	229.5
367	20140310	dose	6	NA	cisplatin	1000	water	3	E	11	DL238	norm.n	21.5
368	20141028	dose	9	NA	amsacrine	200	DMSO	3	E	11	DL238	norm.n	79.3333333333333
369	20140310	dose	6	NA	cisplatin	0	water	3	F	1	CB4856	median.EXT	609.5
370	20141028	dose	9	NA	amsacrine	0	DMSO	3	F	1	CB4856	median.EXT	557
371	20140310	dose	6	NA	cisplatin	0	water	3	F	1	CB4856	median.norm.EXT	2.21239978298873
372	20141028	dose	9	NA	amsacrine	0	DMSO	3	F	1	CB4856	median.norm.EXT	1.88737201365188
373	20140310	dose	6	NA	cisplatin	0	water	3	F	1	CB4856	median.TOF	249
374	20141028	dose	9	NA	amsacrine	0	DMSO	3	F	1	CB4856	median.TOF	285
375	20140310	dose	6	NA	cisplatin	0	water	3	F	1	CB4856	norm.n	204.666666666667
376	20141028	dose	9	NA	amsacrine	0	DMSO	3	F	1	CB4856	norm.n	135
377	20140310	dose	6	NA	cisplatin	125	water	3	F	2	CB4856	median.EXT	675
378	20141028	dose	9	NA	amsacrine	25	DMSO	3	F	2	CB4856	median.EXT	679
379	20140310	dose	6	NA	cisplatin	125	water	3	F	2	CB4856	median.norm.EXT	2.43684210526316
380	20141028	dose	9	NA	amsacrine	25	DMSO	3	F	2	CB4856	median.norm.EXT	2.2059620596206
381	20140310	dose	6	NA	cisplatin	125	water	3	F	2	CB4856	median.TOF	293
382	20141028	dose	9	NA	amsacrine	25	DMSO	3	F	2	CB4856	median.TOF	314
383	20140310	dose	6	NA	cisplatin	125	water	3	F	2	CB4856	norm.n	161.666666666667
384	20141028	dose	9	NA	amsacrine	25	DMSO	3	F	2	CB4856	norm.n	100.333333333333
385	20140310	dose	6	NA	cisplatin	250	water	3	F	3	CB4856	median.EXT	646
386	20141028	dose	9	NA	amsacrine	50	DMSO	3	F	3	CB4856	median.EXT	578
387	20140310	dose	6	NA	cisplatin	250	water	3	F	3	CB4856	median.norm.EXT	2.44919786096257
388	20141028	dose	9	NA	amsacrine	50	DMSO	3	F	3	CB4856	median.norm.EXT	2.21501706484642
389	20140310	dose	6	NA	cisplatin	250	water	3	F	3	CB4856	median.TOF	265
390	20141028	dose	9	NA	amsacrine	50	DMSO	3	F	3	CB4856	median.TOF	269
391	20140310	dose	6	NA	cisplatin	250	water	3	F	3	CB4856	norm.n	145
392	20141028	dose	9	NA	amsacrine	50	DMSO	3	F	3	CB4856	norm.n	108.333333333333
393	20140310	dose	6	NA	cisplatin	500	water	3	F	4	CB4856	median.EXT	392
394	20141028	dose	9	NA	amsacrine	100	DMSO	3	F	4	CB4856	median.EXT	411
395	20140310	dose	6	NA	cisplatin	500	water	3	F	4	CB4856	median.norm.EXT	1.87916666666667
396	20141028	dose	9	NA	amsacrine	100	DMSO	3	F	4	CB4856	median.norm.EXT	1.8921568627451
397	20140310	dose	6	NA	cisplatin	500	water	3	F	4	CB4856	median.TOF	204
398	20141028	dose	9	NA	amsacrine	100	DMSO	3	F	4	CB4856	median.TOF	220
399	20140310	dose	6	NA	cisplatin	500	water	3	F	4	CB4856	norm.n	97
400	20141028	dose	9	NA	amsacrine	100	DMSO	3	F	4	CB4856	norm.n	92.3333333333333
401	20140310	dose	6	NA	cisplatin	1000	water	3	F	5	CB4856	median.EXT	167
402	20141028	dose	9	NA	amsacrine	200	DMSO	3	F	5	CB4856	median.EXT	412
403	20140310	dose	6	NA	cisplatin	1000	water	3	F	5	CB4856	median.norm.EXT	1.68085106382979
404	20141028	dose	9	NA	amsacrine	200	DMSO	3	F	5	CB4856	median.norm.EXT	2.22727272727273
405	20140310	dose	6	NA	cisplatin	1000	water	3	F	5	CB4856	median.TOF	104
406	20141028	dose	9	NA	amsacrine	200	DMSO	3	F	5	CB4856	median.TOF	200
407	20140310	dose	6	NA	cisplatin	1000	water	3	F	5	CB4856	norm.n	23
408	20141028	dose	9	NA	amsacrine	200	DMSO	3	F	5	CB4856	norm.n	52.3333333333333
409	20140310	dose	6	NA	cisplatin	0	water	3	F	7	N2	median.EXT	569
410	20141028	dose	9	NA	amsacrine	0	DMSO	3	F	7	N2	median.EXT	607
411	20140310	dose	6	NA	cisplatin	0	water	3	F	7	N2	median.norm.EXT	2.24134550371873
412	20141028	dose	9	NA	amsacrine	0	DMSO	3	F	7	N2	median.norm.EXT	2.06896551724138
413	20140310	dose	6	NA	cisplatin	0	water	3	F	7	N2	median.TOF	231.5
414	20141028	dose	9	NA	amsacrine	0	DMSO	3	F	7	N2	median.TOF	295
415	20140310	dose	6	NA	cisplatin	0	water	3	F	7	N2	norm.n	143.333333333333
416	20141028	dose	9	NA	amsacrine	0	DMSO	3	F	7	N2	norm.n	117
417	20140310	dose	6	NA	cisplatin	125	water	3	F	8	N2	median.EXT	690
418	20141028	dose	9	NA	amsacrine	25	DMSO	3	F	8	N2	median.EXT	584.5
419	20140310	dose	6	NA	cisplatin	125	water	3	F	8	N2	median.norm.EXT	2.5
420	20141028	dose	9	NA	amsacrine	25	DMSO	3	F	8	N2	median.norm.EXT	2.0109864121087
421	20140310	dose	6	NA	cisplatin	125	water	3	F	8	N2	median.TOF	266
422	20141028	dose	9	NA	amsacrine	25	DMSO	3	F	8	N2	median.TOF	287
423	20140310	dose	6	NA	cisplatin	125	water	3	F	8	N2	norm.n	139
424	20141028	dose	9	NA	amsacrine	25	DMSO	3	F	8	N2	norm.n	138
425	20140310	dose	6	NA	cisplatin	250	water	3	F	9	N2	median.EXT	566
426	20141028	dose	9	NA	amsacrine	50	DMSO	3	F	9	N2	median.EXT	399
427	20140310	dose	6	NA	cisplatin	250	water	3	F	9	N2	median.norm.EXT	2.21266001369323
428	20141028	dose	9	NA	amsacrine	50	DMSO	3	F	9	N2	median.norm.EXT	1.921875
429	20140310	dose	6	NA	cisplatin	250	water	3	F	9	N2	median.TOF	238.5
430	20141028	dose	9	NA	amsacrine	50	DMSO	3	F	9	N2	median.TOF	225
431	20140310	dose	6	NA	cisplatin	250	water	3	F	9	N2	norm.n	154
432	20141028	dose	9	NA	amsacrine	50	DMSO	3	F	9	N2	norm.n	106.333333333333
433	20140310	dose	6	NA	cisplatin	500	water	3	F	10	N2	median.EXT	417
434	20141028	dose	9	NA	amsacrine	100	DMSO	3	F	10	N2	median.EXT	326
435	20140310	dose	6	NA	cisplatin	500	water	3	F	10	N2	median.norm.EXT	1.93857335443409
436	20141028	dose	9	NA	amsacrine	100	DMSO	3	F	10	N2	median.norm.EXT	1.77049180327869
437	20140310	dose	6	NA	cisplatin	500	water	3	F	10	N2	median.TOF	205
438	20141028	dose	9	NA	amsacrine	100	DMSO	3	F	10	N2	median.TOF	176
439	20140310	dose	6	NA	cisplatin	500	water	3	F	10	N2	norm.n	78
440	20141028	dose	9	NA	amsacrine	100	DMSO	3	F	10	N2	norm.n	63.6666666666667
441	20140310	dose	6	NA	cisplatin	1000	water	3	F	11	N2	median.EXT	208.5
442	20141028	dose	9	NA	amsacrine	200	DMSO	3	F	11	N2	median.EXT	221.5
443	20140310	dose	6	NA	cisplatin	1000	water	3	F	11	N2	median.norm.EXT	2.11863991315614
444	20141028	dose	9	NA	amsacrine	200	DMSO	3	F	11	N2	median.norm.EXT	1.69532439841608
445	20140310	dose	6	NA	cisplatin	1000	water	3	F	11	N2	median.TOF	101.5
446	20141028	dose	9	NA	amsacrine	200	DMSO	3	F	11	N2	median.TOF	106.5
447	20140310	dose	6	NA	cisplatin	1000	water	3	F	11	N2	norm.n	20
448	20141028	dose	9	NA	amsacrine	200	DMSO	3	F	11	N2	norm.n	29.3333333333333
449	20140310	dose	6	NA	cisplatin	0	water	3	G	1	CB4856	median.EXT	597
450	20141028	dose	9	NA	amsacrine	0	DMSO	3	G	1	CB4856	median.EXT	550
451	20140310	dose	6	NA	cisplatin	0	water	3	G	1	CB4856	median.norm.EXT	2.16822429906542
452	20141028	dose	9	NA	amsacrine	0	DMSO	3	G	1	CB4856	median.norm.EXT	1.89690721649485
453	20140310	dose	6	NA	cisplatin	0	water	3	G	1	CB4856	median.TOF	257
454	20141028	dose	9	NA	amsacrine	0	DMSO	3	G	1	CB4856	median.TOF	293
455	20140310	dose	6	NA	cisplatin	0	water	3	G	1	CB4856	norm.n	231.666666666667
456	20141028	dose	9	NA	amsacrine	0	DMSO	3	G	1	CB4856	norm.n	163.666666666667
457	20140310	dose	6	NA	cisplatin	125	water	3	G	2	CB4856	median.EXT	659
458	20141028	dose	9	NA	amsacrine	25	DMSO	3	G	2	CB4856	median.EXT	602
459	20140310	dose	6	NA	cisplatin	125	water	3	G	2	CB4856	median.norm.EXT	2.34285714285714
460	20141028	dose	9	NA	amsacrine	25	DMSO	3	G	2	CB4856	median.norm.EXT	2.02809912824168
461	20140310	dose	6	NA	cisplatin	125	water	3	G	2	CB4856	median.TOF	279
462	20141028	dose	9	NA	amsacrine	25	DMSO	3	G	2	CB4856	median.TOF	305.5
463	20140310	dose	6	NA	cisplatin	125	water	3	G	2	CB4856	norm.n	189.666666666667
464	20141028	dose	9	NA	amsacrine	25	DMSO	3	G	2	CB4856	norm.n	108.666666666667
465	20140310	dose	6	NA	cisplatin	250	water	3	G	3	CB4856	median.EXT	691.5
466	20141028	dose	9	NA	amsacrine	50	DMSO	3	G	3	CB4856	median.EXT	541.5
467	20140310	dose	6	NA	cisplatin	250	water	3	G	3	CB4856	median.norm.EXT	2.46171497584541
468	20141028	dose	9	NA	amsacrine	50	DMSO	3	G	3	CB4856	median.norm.EXT	1.98855428515903
469	20140310	dose	6	NA	cisplatin	250	water	3	G	3	CB4856	median.TOF	276
470	20141028	dose	9	NA	amsacrine	50	DMSO	3	G	3	CB4856	median.TOF	271
471	20140310	dose	6	NA	cisplatin	250	water	3	G	3	CB4856	norm.n	127.333333333333
472	20141028	dose	9	NA	amsacrine	50	DMSO	3	G	3	CB4856	norm.n	110.666666666667
473	20140310	dose	6	NA	cisplatin	500	water	3	G	4	CB4856	median.EXT	449
474	20141028	dose	9	NA	amsacrine	100	DMSO	3	G	4	CB4856	median.EXT	489
475	20140310	dose	6	NA	cisplatin	500	water	3	G	4	CB4856	median.norm.EXT	1.95294117647059
476	20141028	dose	9	NA	amsacrine	100	DMSO	3	G	4	CB4856	median.norm.EXT	2.1044776119403
477	20140310	dose	6	NA	cisplatin	500	water	3	G	4	CB4856	median.TOF	205
478	20141028	dose	9	NA	amsacrine	100	DMSO	3	G	4	CB4856	median.TOF	247
479	20140310	dose	6	NA	cisplatin	500	water	3	G	4	CB4856	norm.n	95
480	20141028	dose	9	NA	amsacrine	100	DMSO	3	G	4	CB4856	norm.n	103.666666666667
481	20140310	dose	6	NA	cisplatin	1000	water	3	G	5	CB4856	median.EXT	202.5
482	20141028	dose	9	NA	amsacrine	200	DMSO	3	G	5	CB4856	median.EXT	388
483	20140310	dose	6	NA	cisplatin	1000	water	3	G	5	CB4856	median.norm.EXT	1.74060434809462
484	20141028	dose	9	NA	amsacrine	200	DMSO	3	G	5	CB4856	median.norm.EXT	1.7710843373494
485	20140310	dose	6	NA	cisplatin	1000	water	3	G	5	CB4856	median.TOF	107
486	20141028	dose	9	NA	amsacrine	200	DMSO	3	G	5	CB4856	median.TOF	204
487	20140310	dose	6	NA	cisplatin	1000	water	3	G	5	CB4856	norm.n	21.3333333333333
488	20141028	dose	9	NA	amsacrine	200	DMSO	3	G	5	CB4856	norm.n	79
489	20140310	dose	6	NA	cisplatin	0	water	3	G	7	JU258	median.EXT	146
490	20141028	dose	9	NA	amsacrine	0	DMSO	3	G	7	JU258	median.EXT	964
491	20140310	dose	6	NA	cisplatin	0	water	3	G	7	JU258	median.norm.EXT	1.73333333333333
492	20141028	dose	9	NA	amsacrine	0	DMSO	3	G	7	JU258	median.norm.EXT	2.51522556390977
493	20140310	dose	6	NA	cisplatin	0	water	3	G	7	JU258	median.TOF	75
494	20141028	dose	9	NA	amsacrine	0	DMSO	3	G	7	JU258	median.TOF	329
495	20140310	dose	6	NA	cisplatin	0	water	3	G	7	JU258	norm.n	11
496	20141028	dose	9	NA	amsacrine	0	DMSO	3	G	7	JU258	norm.n	91.3333333333333
497	20141028	dose	9	NA	amsacrine	25	DMSO	3	G	8	JU258	median.EXT	568
498	20141028	dose	9	NA	amsacrine	25	DMSO	3	G	8	JU258	median.norm.EXT	2.10053656377918
499	20141028	dose	9	NA	amsacrine	25	DMSO	3	G	8	JU258	median.TOF	263.5
500	20141028	dose	9	NA	amsacrine	25	DMSO	3	G	8	JU258	norm.n	90.6666666666667
501	20140310	dose	6	NA	cisplatin	250	water	3	G	9	JU258	median.EXT	570
502	20141028	dose	9	NA	amsacrine	50	DMSO	3	G	9	JU258	median.EXT	539.5
503	20140310	dose	6	NA	cisplatin	250	water	3	G	9	JU258	median.norm.EXT	2.3539603960396
504	20141028	dose	9	NA	amsacrine	50	DMSO	3	G	9	JU258	median.norm.EXT	1.98137118054228
505	20140310	dose	6	NA	cisplatin	250	water	3	G	9	JU258	median.TOF	243
506	20141028	dose	9	NA	amsacrine	50	DMSO	3	G	9	JU258	median.TOF	277
507	20140310	dose	6	NA	cisplatin	250	water	3	G	9	JU258	norm.n	91
508	20141028	dose	9	NA	amsacrine	50	DMSO	3	G	9	JU258	norm.n	122
509	20141028	dose	9	NA	amsacrine	100	DMSO	3	G	10	JU258	median.EXT	448
510	20141028	dose	9	NA	amsacrine	100	DMSO	3	G	10	JU258	median.norm.EXT	2.03448275862069
511	20141028	dose	9	NA	amsacrine	100	DMSO	3	G	10	JU258	median.TOF	214
512	20141028	dose	9	NA	amsacrine	100	DMSO	3	G	10	JU258	norm.n	55.6666666666667
513	20140310	dose	6	NA	cisplatin	1000	water	3	G	11	JU258	median.EXT	128.5
514	20141028	dose	9	NA	amsacrine	200	DMSO	3	G	11	JU258	median.EXT	394
515	20140310	dose	6	NA	cisplatin	1000	water	3	G	11	JU258	median.norm.EXT	1.43432624113475
516	20141028	dose	9	NA	amsacrine	200	DMSO	3	G	11	JU258	median.norm.EXT	2.10309278350515
517	20140310	dose	6	NA	cisplatin	1000	water	3	G	11	JU258	median.TOF	105
518	20141028	dose	9	NA	amsacrine	200	DMSO	3	G	11	JU258	median.TOF	188
519	20140310	dose	6	NA	cisplatin	1000	water	3	G	11	JU258	norm.n	14
520	20141028	dose	9	NA	amsacrine	200	DMSO	3	G	11	JU258	norm.n	39.6666666666667
521	20140310	dose	6	NA	cisplatin	0	water	3	H	1	N2	median.EXT	610
522	20141028	dose	9	NA	amsacrine	0	DMSO	3	H	1	N2	median.EXT	558
523	20140310	dose	6	NA	cisplatin	0	water	3	H	1	N2	median.norm.EXT	2.33012820512821
524	20141028	dose	9	NA	amsacrine	0	DMSO	3	H	1	N2	median.norm.EXT	1.93983176259833
525	20140310	dose	6	NA	cisplatin	0	water	3	H	1	N2	median.TOF	236
526	20141028	dose	9	NA	amsacrine	0	DMSO	3	H	1	N2	median.TOF	297.5
527	20140310	dose	6	NA	cisplatin	0	water	3	H	1	N2	norm.n	185.666666666667
528	20141028	dose	9	NA	amsacrine	0	DMSO	3	H	1	N2	norm.n	124
529	20140310	dose	6	NA	cisplatin	125	water	3	H	2	N2	median.EXT	672
530	20141028	dose	9	NA	amsacrine	25	DMSO	3	H	2	N2	median.EXT	587
531	20140310	dose	6	NA	cisplatin	125	water	3	H	2	N2	median.norm.EXT	2.37537537537538
532	20141028	dose	9	NA	amsacrine	25	DMSO	3	H	2	N2	median.norm.EXT	2.08405797101449
533	20140310	dose	6	NA	cisplatin	125	water	3	H	2	N2	median.TOF	275
534	20141028	dose	9	NA	amsacrine	25	DMSO	3	H	2	N2	median.TOF	288
535	20140310	dose	6	NA	cisplatin	125	water	3	H	2	N2	norm.n	149
536	20141028	dose	9	NA	amsacrine	25	DMSO	3	H	2	N2	norm.n	99.6666666666667
537	20140310	dose	6	NA	cisplatin	250	water	3	H	3	N2	median.EXT	641.5
538	20141028	dose	9	NA	amsacrine	50	DMSO	3	H	3	N2	median.EXT	403
539	20140310	dose	6	NA	cisplatin	250	water	3	H	3	N2	median.norm.EXT	2.36820405310971
540	20141028	dose	9	NA	amsacrine	50	DMSO	3	H	3	N2	median.norm.EXT	1.7523610169325
541	20140310	dose	6	NA	cisplatin	250	water	3	H	3	N2	median.TOF	272
542	20141028	dose	9	NA	amsacrine	50	DMSO	3	H	3	N2	median.TOF	242
543	20140310	dose	6	NA	cisplatin	250	water	3	H	3	N2	norm.n	154
544	20141028	dose	9	NA	amsacrine	50	DMSO	3	H	3	N2	norm.n	94.6666666666667
545	20140310	dose	6	NA	cisplatin	500	water	3	H	4	N2	median.EXT	368.5
546	20141028	dose	9	NA	amsacrine	100	DMSO	3	H	4	N2	median.EXT	316
547	20140310	dose	6	NA	cisplatin	500	water	3	H	4	N2	median.norm.EXT	1.82930547713156
548	20141028	dose	9	NA	amsacrine	100	DMSO	3	H	4	N2	median.norm.EXT	1.63040984798307
549	20140310	dose	6	NA	cisplatin	500	water	3	H	4	N2	median.TOF	208
550	20141028	dose	9	NA	amsacrine	100	DMSO	3	H	4	N2	median.TOF	189.5
551	20140310	dose	6	NA	cisplatin	500	water	3	H	4	N2	norm.n	69.3333333333333
552	20141028	dose	9	NA	amsacrine	100	DMSO	3	H	4	N2	norm.n	48.6666666666667
553	20140310	dose	6	NA	cisplatin	1000	water	3	H	5	N2	median.EXT	267
554	20141028	dose	9	NA	amsacrine	200	DMSO	3	H	5	N2	median.EXT	210
555	20140310	dose	6	NA	cisplatin	1000	water	3	H	5	N2	median.norm.EXT	2.20408163265306
556	20141028	dose	9	NA	amsacrine	200	DMSO	3	H	5	N2	median.norm.EXT	1.48453483689086
557	20140310	dose	6	NA	cisplatin	1000	water	3	H	5	N2	median.TOF	131
558	20141028	dose	9	NA	amsacrine	200	DMSO	3	H	5	N2	median.TOF	135
559	20140310	dose	6	NA	cisplatin	1000	water	3	H	5	N2	norm.n	15
560	20141028	dose	9	NA	amsacrine	200	DMSO	3	H	5	N2	norm.n	31.3333333333333
561	20140310	dose	6	NA	cisplatin	0	water	3	H	7	DL238	median.EXT	180
562	20141028	dose	9	NA	amsacrine	0	DMSO	3	H	7	DL238	median.EXT	598
563	20140310	dose	6	NA	cisplatin	0	water	3	H	7	DL238	median.norm.EXT	1.61728395061728
564	20141028	dose	9	NA	amsacrine	0	DMSO	3	H	7	DL238	median.norm.EXT	1.996699669967
565	20140310	dose	6	NA	cisplatin	0	water	3	H	7	DL238	median.TOF	132
566	20141028	dose	9	NA	amsacrine	0	DMSO	3	H	7	DL238	median.TOF	302
567	20140310	dose	6	NA	cisplatin	0	water	3	H	7	DL238	norm.n	212.333333333333
568	20141028	dose	9	NA	amsacrine	0	DMSO	3	H	7	DL238	norm.n	109.666666666667
569	20140310	dose	6	NA	cisplatin	125	water	3	H	8	DL238	median.EXT	627.5
570	20141028	dose	9	NA	amsacrine	25	DMSO	3	H	8	DL238	median.EXT	543.5
571	20140310	dose	6	NA	cisplatin	125	water	3	H	8	DL238	median.norm.EXT	2.19725321282305
572	20141028	dose	9	NA	amsacrine	25	DMSO	3	H	8	DL238	median.norm.EXT	1.94396363079347
573	20140310	dose	6	NA	cisplatin	125	water	3	H	8	DL238	median.TOF	245
574	20141028	dose	9	NA	amsacrine	25	DMSO	3	H	8	DL238	median.TOF	283
575	20140310	dose	6	NA	cisplatin	125	water	3	H	8	DL238	norm.n	142.666666666667
576	20141028	dose	9	NA	amsacrine	25	DMSO	3	H	8	DL238	norm.n	120.666666666667
577	20140310	dose	6	NA	cisplatin	250	water	3	H	9	DL238	median.EXT	594
578	20141028	dose	9	NA	amsacrine	50	DMSO	3	H	9	DL238	median.EXT	534.5
579	20140310	dose	6	NA	cisplatin	250	water	3	H	9	DL238	median.norm.EXT	2.24264884016716
580	20141028	dose	9	NA	amsacrine	50	DMSO	3	H	9	DL238	median.norm.EXT	1.99576586290877
581	20140310	dose	6	NA	cisplatin	250	water	3	H	9	DL238	median.TOF	235
582	20141028	dose	9	NA	amsacrine	50	DMSO	3	H	9	DL238	median.TOF	274.5
583	20140310	dose	6	NA	cisplatin	250	water	3	H	9	DL238	norm.n	154
584	20141028	dose	9	NA	amsacrine	50	DMSO	3	H	9	DL238	norm.n	106
585	20140310	dose	6	NA	cisplatin	500	water	3	H	10	DL238	median.EXT	449
586	20141028	dose	9	NA	amsacrine	100	DMSO	3	H	10	DL238	median.EXT	432
587	20140310	dose	6	NA	cisplatin	500	water	3	H	10	DL238	median.norm.EXT	2.02532647666902
588	20141028	dose	9	NA	amsacrine	100	DMSO	3	H	10	DL238	median.norm.EXT	1.88998926724558
589	20140310	dose	6	NA	cisplatin	500	water	3	H	10	DL238	median.TOF	203
590	20141028	dose	9	NA	amsacrine	100	DMSO	3	H	10	DL238	median.TOF	222.5
591	20140310	dose	6	NA	cisplatin	500	water	3	H	10	DL238	norm.n	75.3333333333333
592	20141028	dose	9	NA	amsacrine	100	DMSO	3	H	10	DL238	norm.n	92
593	20140310	dose	6	NA	cisplatin	1000	water	3	H	11	DL238	median.EXT	229
594	20141028	dose	9	NA	amsacrine	200	DMSO	3	H	11	DL238	median.EXT	477.5
595	20140310	dose	6	NA	cisplatin	1000	water	3	H	11	DL238	median.norm.EXT	2.0875
596	20141028	dose	9	NA	amsacrine	200	DMSO	3	H	11	DL238	median.norm.EXT	2.01005147702039
597	20140310	dose	6	NA	cisplatin	1000	water	3	H	11	DL238	median.TOF	99
598	20141028	dose	9	NA	amsacrine	200	DMSO	3	H	11	DL238	median.TOF	240
599	20140310	dose	6	NA	cisplatin	1000	water	3	H	11	DL238	norm.n	17.6666666666667
600	20141028	dose	9	NA	amsacrine	200	DMSO	3	H	11	DL238	norm.n	60.6666666666667
601	20141028	dose	9	NA	bortezomib	0	DMSO	4	A	1	N2	median.EXT	571
602	20141028	dose	9	NA	bortezomib	0	DMSO	4	A	1	N2	median.norm.EXT	2.1241610738255
603	20141028	dose	9	NA	bortezomib	0	DMSO	4	A	1	N2	median.TOF	277
604	20141028	dose	9	NA	bortezomib	0	DMSO	4	A	1	N2	norm.n	163.666666666667
605	20141028	dose	9	NA	bortezomib	1	DMSO	4	A	2	N2	median.EXT	496
606	20141028	dose	9	NA	bortezomib	1	DMSO	4	A	2	N2	median.norm.EXT	2.10738255033557
607	20141028	dose	9	NA	bortezomib	1	DMSO	4	A	2	N2	median.TOF	258
608	20141028	dose	9	NA	bortezomib	1	DMSO	4	A	2	N2	norm.n	113
609	20141028	dose	9	NA	bortezomib	2	DMSO	4	A	3	N2	median.EXT	404
610	20141028	dose	9	NA	bortezomib	2	DMSO	4	A	3	N2	median.norm.EXT	1.73171384106604
611	20141028	dose	9	NA	bortezomib	2	DMSO	4	A	3	N2	median.TOF	214
612	20141028	dose	9	NA	bortezomib	2	DMSO	4	A	3	N2	norm.n	85
613	20141028	dose	9	NA	bortezomib	3	DMSO	4	A	4	N2	median.EXT	437.5
614	20141028	dose	9	NA	bortezomib	3	DMSO	4	A	4	N2	median.norm.EXT	1.91633276470822
615	20141028	dose	9	NA	bortezomib	3	DMSO	4	A	4	N2	median.TOF	237.5
616	20141028	dose	9	NA	bortezomib	3	DMSO	4	A	4	N2	norm.n	36.6666666666667
617	20141028	dose	9	NA	bortezomib	4	DMSO	4	A	5	N2	median.EXT	335
618	20141028	dose	9	NA	bortezomib	4	DMSO	4	A	5	N2	median.norm.EXT	1.91379310344828
619	20141028	dose	9	NA	bortezomib	4	DMSO	4	A	5	N2	median.TOF	174
620	20141028	dose	9	NA	bortezomib	4	DMSO	4	A	5	N2	norm.n	18.3333333333333
621	20141028	dose	9	NA	bortezomib	0	DMSO	4	A	7	CB4856	median.EXT	510
622	20141028	dose	9	NA	bortezomib	0	DMSO	4	A	7	CB4856	median.norm.EXT	1.92384105960265
623	20141028	dose	9	NA	bortezomib	0	DMSO	4	A	7	CB4856	median.TOF	273
624	20141028	dose	9	NA	bortezomib	0	DMSO	4	A	7	CB4856	norm.n	156.333333333333
625	20141028	dose	9	NA	bortezomib	1	DMSO	4	A	8	CB4856	median.EXT	409.5
626	20141028	dose	9	NA	bortezomib	1	DMSO	4	A	8	CB4856	median.norm.EXT	1.73142993750213
627	20141028	dose	9	NA	bortezomib	1	DMSO	4	A	8	CB4856	median.TOF	236
628	20141028	dose	9	NA	bortezomib	1	DMSO	4	A	8	CB4856	norm.n	121.333333333333
629	20141028	dose	9	NA	bortezomib	2	DMSO	4	A	9	CB4856	median.EXT	404
630	20141028	dose	9	NA	bortezomib	2	DMSO	4	A	9	CB4856	median.norm.EXT	1.7816091954023
631	20141028	dose	9	NA	bortezomib	2	DMSO	4	A	9	CB4856	median.TOF	220
632	20141028	dose	9	NA	bortezomib	2	DMSO	4	A	9	CB4856	norm.n	91.6666666666667
633	20141028	dose	9	NA	bortezomib	3	DMSO	4	A	10	CB4856	median.EXT	409
634	20141028	dose	9	NA	bortezomib	3	DMSO	4	A	10	CB4856	median.norm.EXT	1.80864216190073
635	20141028	dose	9	NA	bortezomib	3	DMSO	4	A	10	CB4856	median.TOF	212.5
636	20141028	dose	9	NA	bortezomib	3	DMSO	4	A	10	CB4856	norm.n	41.3333333333333
637	20141028	dose	9	NA	bortezomib	4	DMSO	4	A	11	CB4856	median.EXT	276
638	20141028	dose	9	NA	bortezomib	4	DMSO	4	A	11	CB4856	median.norm.EXT	1.82817869415808
639	20141028	dose	9	NA	bortezomib	4	DMSO	4	A	11	CB4856	median.TOF	139
640	20141028	dose	9	NA	bortezomib	4	DMSO	4	A	11	CB4856	norm.n	35.6666666666667
641	20141028	dose	9	NA	bortezomib	0	DMSO	4	B	1	DL238	median.EXT	484
642	20141028	dose	9	NA	bortezomib	0	DMSO	4	B	1	DL238	median.norm.EXT	1.78595317725753
643	20141028	dose	9	NA	bortezomib	0	DMSO	4	B	1	DL238	median.TOF	248
644	20141028	dose	9	NA	bortezomib	0	DMSO	4	B	1	DL238	norm.n	179
645	20141028	dose	9	NA	bortezomib	1	DMSO	4	B	2	DL238	median.EXT	537
646	20141028	dose	9	NA	bortezomib	1	DMSO	4	B	2	DL238	median.norm.EXT	1.97857142857143
647	20141028	dose	9	NA	bortezomib	1	DMSO	4	B	2	DL238	median.TOF	279
648	20141028	dose	9	NA	bortezomib	1	DMSO	4	B	2	DL238	norm.n	115.666666666667
649	20141028	dose	9	NA	bortezomib	2	DMSO	4	B	3	DL238	median.EXT	514
650	20141028	dose	9	NA	bortezomib	2	DMSO	4	B	3	DL238	median.norm.EXT	2.11358574610245
651	20141028	dose	9	NA	bortezomib	2	DMSO	4	B	3	DL238	median.TOF	276
652	20141028	dose	9	NA	bortezomib	2	DMSO	4	B	3	DL238	norm.n	65.6666666666667
653	20141028	dose	9	NA	bortezomib	3	DMSO	4	B	4	DL238	median.EXT	467
654	20141028	dose	9	NA	bortezomib	3	DMSO	4	B	4	DL238	median.norm.EXT	1.93014705882353
655	20141028	dose	9	NA	bortezomib	3	DMSO	4	B	4	DL238	median.TOF	246
656	20141028	dose	9	NA	bortezomib	3	DMSO	4	B	4	DL238	norm.n	47
657	20141028	dose	9	NA	bortezomib	4	DMSO	4	B	5	DL238	median.EXT	473
658	20141028	dose	9	NA	bortezomib	4	DMSO	4	B	5	DL238	median.norm.EXT	2.03191489361702
659	20141028	dose	9	NA	bortezomib	4	DMSO	4	B	5	DL238	median.TOF	220
660	20141028	dose	9	NA	bortezomib	4	DMSO	4	B	5	DL238	norm.n	15.6666666666667
661	20141028	dose	9	NA	bortezomib	0	DMSO	4	B	7	JU258	median.EXT	734
662	20141028	dose	9	NA	bortezomib	0	DMSO	4	B	7	JU258	median.norm.EXT	2.7
663	20141028	dose	9	NA	bortezomib	0	DMSO	4	B	7	JU258	median.TOF	296
664	20141028	dose	9	NA	bortezomib	0	DMSO	4	B	7	JU258	norm.n	105
665	20141028	dose	9	NA	bortezomib	1	DMSO	4	B	8	JU258	median.EXT	763
666	20141028	dose	9	NA	bortezomib	1	DMSO	4	B	8	JU258	median.norm.EXT	2.96049733587243
667	20141028	dose	9	NA	bortezomib	1	DMSO	4	B	8	JU258	median.TOF	224
668	20141028	dose	9	NA	bortezomib	1	DMSO	4	B	8	JU258	norm.n	36.6666666666667
669	20141028	dose	9	NA	bortezomib	2	DMSO	4	B	9	JU258	median.EXT	275
670	20141028	dose	9	NA	bortezomib	2	DMSO	4	B	9	JU258	median.norm.EXT	2.64220183486239
671	20141028	dose	9	NA	bortezomib	2	DMSO	4	B	9	JU258	median.TOF	98
672	20141028	dose	9	NA	bortezomib	2	DMSO	4	B	9	JU258	norm.n	10.3333333333333
673	20141028	dose	9	NA	bortezomib	3	DMSO	4	B	10	JU258	median.EXT	342
674	20141028	dose	9	NA	bortezomib	3	DMSO	4	B	10	JU258	median.norm.EXT	2.67857142857143
675	20141028	dose	9	NA	bortezomib	3	DMSO	4	B	10	JU258	median.TOF	112
676	20141028	dose	9	NA	bortezomib	3	DMSO	4	B	10	JU258	norm.n	6.33333333333333
677	20141028	dose	9	NA	bortezomib	4	DMSO	4	B	11	JU258	median.EXT	204
678	20141028	dose	9	NA	bortezomib	4	DMSO	4	B	11	JU258	median.norm.EXT	2.32
679	20141028	dose	9	NA	bortezomib	4	DMSO	4	B	11	JU258	median.TOF	79
680	20141028	dose	9	NA	bortezomib	4	DMSO	4	B	11	JU258	norm.n	12.3333333333333
681	20141028	dose	9	NA	bortezomib	0	DMSO	4	C	1	DL238	median.EXT	516
682	20141028	dose	9	NA	bortezomib	0	DMSO	4	C	1	DL238	median.norm.EXT	1.96428571428571
683	20141028	dose	9	NA	bortezomib	0	DMSO	4	C	1	DL238	median.TOF	262
684	20141028	dose	9	NA	bortezomib	0	DMSO	4	C	1	DL238	norm.n	151.666666666667
685	20141028	dose	9	NA	bortezomib	1	DMSO	4	C	2	DL238	median.EXT	523.5
686	20141028	dose	9	NA	bortezomib	1	DMSO	4	C	2	DL238	median.norm.EXT	1.97689506785833
687	20141028	dose	9	NA	bortezomib	1	DMSO	4	C	2	DL238	median.TOF	270
688	20141028	dose	9	NA	bortezomib	1	DMSO	4	C	2	DL238	norm.n	111.333333333333
689	20141028	dose	9	NA	bortezomib	2	DMSO	4	C	3	DL238	median.EXT	462
690	20141028	dose	9	NA	bortezomib	2	DMSO	4	C	3	DL238	median.norm.EXT	2.0031847133758
691	20141028	dose	9	NA	bortezomib	2	DMSO	4	C	3	DL238	median.TOF	230
692	20141028	dose	9	NA	bortezomib	2	DMSO	4	C	3	DL238	norm.n	52.3333333333333
693	20141028	dose	9	NA	bortezomib	3	DMSO	4	C	4	DL238	median.EXT	473.5
694	20141028	dose	9	NA	bortezomib	3	DMSO	4	C	4	DL238	median.norm.EXT	2.01466094880729
695	20141028	dose	9	NA	bortezomib	3	DMSO	4	C	4	DL238	median.TOF	247
696	20141028	dose	9	NA	bortezomib	3	DMSO	4	C	4	DL238	norm.n	57.3333333333333
697	20141028	dose	9	NA	bortezomib	4	DMSO	4	C	5	DL238	median.EXT	384.5
698	20141028	dose	9	NA	bortezomib	4	DMSO	4	C	5	DL238	median.norm.EXT	1.75412608225108
699	20141028	dose	9	NA	bortezomib	4	DMSO	4	C	5	DL238	median.TOF	212
700	20141028	dose	9	NA	bortezomib	4	DMSO	4	C	5	DL238	norm.n	73.3333333333333
701	20141028	dose	9	NA	bortezomib	0	DMSO	4	C	7	N2	median.EXT	556.5
702	20141028	dose	9	NA	bortezomib	0	DMSO	4	C	7	N2	median.norm.EXT	2.36885563935301
703	20141028	dose	9	NA	bortezomib	0	DMSO	4	C	7	N2	median.TOF	272
704	20141028	dose	9	NA	bortezomib	0	DMSO	4	C	7	N2	norm.n	133.333333333333
705	20141028	dose	9	NA	bortezomib	1	DMSO	4	C	8	N2	median.EXT	535
706	20141028	dose	9	NA	bortezomib	1	DMSO	4	C	8	N2	median.norm.EXT	2.26415094339623
707	20141028	dose	9	NA	bortezomib	1	DMSO	4	C	8	N2	median.TOF	255
708	20141028	dose	9	NA	bortezomib	1	DMSO	4	C	8	N2	norm.n	65
709	20141028	dose	9	NA	bortezomib	2	DMSO	4	C	9	N2	median.EXT	441
710	20141028	dose	9	NA	bortezomib	2	DMSO	4	C	9	N2	median.norm.EXT	2.01219512195122
711	20141028	dose	9	NA	bortezomib	2	DMSO	4	C	9	N2	median.TOF	234
712	20141028	dose	9	NA	bortezomib	2	DMSO	4	C	9	N2	norm.n	54.3333333333333
713	20141028	dose	9	NA	bortezomib	3	DMSO	4	C	10	N2	median.EXT	438.5
714	20141028	dose	9	NA	bortezomib	3	DMSO	4	C	10	N2	median.norm.EXT	1.98348577235772
715	20141028	dose	9	NA	bortezomib	3	DMSO	4	C	10	N2	median.TOF	217
716	20141028	dose	9	NA	bortezomib	3	DMSO	4	C	10	N2	norm.n	39.3333333333333
717	20141028	dose	9	NA	bortezomib	4	DMSO	4	C	11	N2	median.EXT	228.5
718	20141028	dose	9	NA	bortezomib	4	DMSO	4	C	11	N2	median.norm.EXT	2.11907051282051
719	20141028	dose	9	NA	bortezomib	4	DMSO	4	C	11	N2	median.TOF	107.5
720	20141028	dose	9	NA	bortezomib	4	DMSO	4	C	11	N2	norm.n	10
721	20141028	dose	9	NA	bortezomib	0	DMSO	4	D	1	JU258	median.EXT	692
722	20141028	dose	9	NA	bortezomib	0	DMSO	4	D	1	JU258	median.norm.EXT	2.5729738027016
723	20141028	dose	9	NA	bortezomib	0	DMSO	4	D	1	JU258	median.TOF	293.5
724	20141028	dose	9	NA	bortezomib	0	DMSO	4	D	1	JU258	norm.n	111.333333333333
725	20141028	dose	9	NA	bortezomib	1	DMSO	4	D	2	JU258	median.EXT	815
726	20141028	dose	9	NA	bortezomib	1	DMSO	4	D	2	JU258	median.norm.EXT	2.91787439613527
727	20141028	dose	9	NA	bortezomib	1	DMSO	4	D	2	JU258	median.TOF	268
728	20141028	dose	9	NA	bortezomib	1	DMSO	4	D	2	JU258	norm.n	49.6666666666667
729	20141028	dose	9	NA	bortezomib	2	DMSO	4	D	3	JU258	median.EXT	202
730	20141028	dose	9	NA	bortezomib	2	DMSO	4	D	3	JU258	median.norm.EXT	2.25984251968504
731	20141028	dose	9	NA	bortezomib	2	DMSO	4	D	3	JU258	median.TOF	102
732	20141028	dose	9	NA	bortezomib	2	DMSO	4	D	3	JU258	norm.n	9.66666666666667
733	20141028	dose	9	NA	bortezomib	3	DMSO	4	D	4	JU258	median.EXT	277
734	20141028	dose	9	NA	bortezomib	3	DMSO	4	D	4	JU258	median.norm.EXT	2.52777777777778
735	20141028	dose	9	NA	bortezomib	3	DMSO	4	D	4	JU258	median.TOF	85
736	20141028	dose	9	NA	bortezomib	3	DMSO	4	D	4	JU258	norm.n	3.66666666666667
737	20141028	dose	9	NA	bortezomib	4	DMSO	4	D	5	JU258	median.EXT	266
738	20141028	dose	9	NA	bortezomib	4	DMSO	4	D	5	JU258	median.norm.EXT	3.13684210526316
739	20141028	dose	9	NA	bortezomib	4	DMSO	4	D	5	JU258	median.TOF	88
740	20141028	dose	9	NA	bortezomib	4	DMSO	4	D	5	JU258	norm.n	7
741	20141028	dose	9	NA	bortezomib	0	DMSO	4	D	7	CB4856	median.EXT	511
742	20141028	dose	9	NA	bortezomib	0	DMSO	4	D	7	CB4856	median.norm.EXT	1.90554885230831
743	20141028	dose	9	NA	bortezomib	0	DMSO	4	D	7	CB4856	median.TOF	266
744	20141028	dose	9	NA	bortezomib	0	DMSO	4	D	7	CB4856	norm.n	152
745	20141028	dose	9	NA	bortezomib	1	DMSO	4	D	8	CB4856	median.EXT	404.5
746	20141028	dose	9	NA	bortezomib	1	DMSO	4	D	8	CB4856	median.norm.EXT	1.78935772964899
747	20141028	dose	9	NA	bortezomib	1	DMSO	4	D	8	CB4856	median.TOF	236
748	20141028	dose	9	NA	bortezomib	1	DMSO	4	D	8	CB4856	norm.n	132.666666666667
749	20141028	dose	9	NA	bortezomib	2	DMSO	4	D	9	CB4856	median.EXT	440.5
750	20141028	dose	9	NA	bortezomib	2	DMSO	4	D	9	CB4856	median.norm.EXT	1.80915061949545
751	20141028	dose	9	NA	bortezomib	2	DMSO	4	D	9	CB4856	median.TOF	245
752	20141028	dose	9	NA	bortezomib	2	DMSO	4	D	9	CB4856	norm.n	110.666666666667
753	20141028	dose	9	NA	bortezomib	3	DMSO	4	D	10	CB4856	median.EXT	355
754	20141028	dose	9	NA	bortezomib	3	DMSO	4	D	10	CB4856	median.norm.EXT	1.76838731443995
755	20141028	dose	9	NA	bortezomib	3	DMSO	4	D	10	CB4856	median.TOF	184.5
756	20141028	dose	9	NA	bortezomib	3	DMSO	4	D	10	CB4856	norm.n	72.6666666666667
757	20141028	dose	9	NA	bortezomib	4	DMSO	4	D	11	CB4856	median.EXT	323
758	20141028	dose	9	NA	bortezomib	4	DMSO	4	D	11	CB4856	median.norm.EXT	2.03926096997691
759	20141028	dose	9	NA	bortezomib	4	DMSO	4	D	11	CB4856	median.TOF	152
760	20141028	dose	9	NA	bortezomib	4	DMSO	4	D	11	CB4856	norm.n	31.6666666666667
761	20141028	dose	9	NA	bortezomib	0	DMSO	4	E	1	JU258	median.EXT	670
762	20141028	dose	9	NA	bortezomib	0	DMSO	4	E	1	JU258	median.norm.EXT	2.47865168539326
763	20141028	dose	9	NA	bortezomib	0	DMSO	4	E	1	JU258	median.TOF	282
764	20141028	dose	9	NA	bortezomib	0	DMSO	4	E	1	JU258	norm.n	94.3333333333333
765	20141028	dose	9	NA	bortezomib	1	DMSO	4	E	2	JU258	median.EXT	416
766	20141028	dose	9	NA	bortezomib	1	DMSO	4	E	2	JU258	median.norm.EXT	2.06451612903226
767	20141028	dose	9	NA	bortezomib	1	DMSO	4	E	2	JU258	median.TOF	199
768	20141028	dose	9	NA	bortezomib	1	DMSO	4	E	2	JU258	norm.n	15.6666666666667
769	20141028	dose	9	NA	bortezomib	2	DMSO	4	E	3	JU258	median.EXT	221
770	20141028	dose	9	NA	bortezomib	2	DMSO	4	E	3	JU258	median.norm.EXT	2.58730158730159
771	20141028	dose	9	NA	bortezomib	2	DMSO	4	E	3	JU258	median.TOF	86
772	20141028	dose	9	NA	bortezomib	2	DMSO	4	E	3	JU258	norm.n	7
773	20141028	dose	9	NA	bortezomib	3	DMSO	4	E	4	JU258	median.EXT	386
774	20141028	dose	9	NA	bortezomib	3	DMSO	4	E	4	JU258	median.norm.EXT	3.12345679012346
775	20141028	dose	9	NA	bortezomib	3	DMSO	4	E	4	JU258	median.TOF	128
776	20141028	dose	9	NA	bortezomib	3	DMSO	4	E	4	JU258	norm.n	3
777	20141028	dose	9	NA	bortezomib	4	DMSO	4	E	5	JU258	median.EXT	285
778	20141028	dose	9	NA	bortezomib	4	DMSO	4	E	5	JU258	median.norm.EXT	2.66355140186916
779	20141028	dose	9	NA	bortezomib	4	DMSO	4	E	5	JU258	median.TOF	100
780	20141028	dose	9	NA	bortezomib	4	DMSO	4	E	5	JU258	norm.n	5.66666666666667
781	20141028	dose	9	NA	bortezomib	0	DMSO	4	E	7	DL238	median.EXT	482
782	20141028	dose	9	NA	bortezomib	0	DMSO	4	E	7	DL238	median.norm.EXT	1.77510040160643
783	20141028	dose	9	NA	bortezomib	0	DMSO	4	E	7	DL238	median.TOF	262
784	20141028	dose	9	NA	bortezomib	0	DMSO	4	E	7	DL238	norm.n	145.666666666667
785	20141028	dose	9	NA	bortezomib	1	DMSO	4	E	8	DL238	median.EXT	530
786	20141028	dose	9	NA	bortezomib	1	DMSO	4	E	8	DL238	median.norm.EXT	1.99111111111111
787	20141028	dose	9	NA	bortezomib	1	DMSO	4	E	8	DL238	median.TOF	283
788	20141028	dose	9	NA	bortezomib	1	DMSO	4	E	8	DL238	norm.n	123.666666666667
789	20141028	dose	9	NA	bortezomib	2	DMSO	4	E	9	DL238	median.EXT	498
790	20141028	dose	9	NA	bortezomib	2	DMSO	4	E	9	DL238	median.norm.EXT	2.17032815516132
791	20141028	dose	9	NA	bortezomib	2	DMSO	4	E	9	DL238	median.TOF	263.5
792	20141028	dose	9	NA	bortezomib	2	DMSO	4	E	9	DL238	norm.n	75.3333333333333
793	20141028	dose	9	NA	bortezomib	3	DMSO	4	E	10	DL238	median.EXT	448.5
794	20141028	dose	9	NA	bortezomib	3	DMSO	4	E	10	DL238	median.norm.EXT	2.19420289855072
795	20141028	dose	9	NA	bortezomib	3	DMSO	4	E	10	DL238	median.TOF	222.5
796	20141028	dose	9	NA	bortezomib	3	DMSO	4	E	10	DL238	norm.n	35.3333333333333
797	20141028	dose	9	NA	bortezomib	4	DMSO	4	E	11	DL238	median.EXT	361
798	20141028	dose	9	NA	bortezomib	4	DMSO	4	E	11	DL238	median.norm.EXT	1.92481203007519
799	20141028	dose	9	NA	bortezomib	4	DMSO	4	E	11	DL238	median.TOF	178
800	20141028	dose	9	NA	bortezomib	4	DMSO	4	E	11	DL238	norm.n	32.3333333333333
801	20141028	dose	9	NA	bortezomib	0	DMSO	4	F	1	CB4856	median.EXT	655
802	20141028	dose	9	NA	bortezomib	0	DMSO	4	F	1	CB4856	median.norm.EXT	2.14052287581699
803	20141028	dose	9	NA	bortezomib	0	DMSO	4	F	1	CB4856	median.TOF	303
804	20141028	dose	9	NA	bortezomib	0	DMSO	4	F	1	CB4856	norm.n	95
805	20141028	dose	9	NA	bortezomib	1	DMSO	4	F	2	CB4856	median.EXT	450
806	20141028	dose	9	NA	bortezomib	1	DMSO	4	F	2	CB4856	median.norm.EXT	1.8300395256917
807	20141028	dose	9	NA	bortezomib	1	DMSO	4	F	2	CB4856	median.TOF	251
808	20141028	dose	9	NA	bortezomib	1	DMSO	4	F	2	CB4856	norm.n	117
809	20141028	dose	9	NA	bortezomib	2	DMSO	4	F	3	CB4856	median.EXT	361
810	20141028	dose	9	NA	bortezomib	2	DMSO	4	F	3	CB4856	median.norm.EXT	1.6476088289393
811	20141028	dose	9	NA	bortezomib	2	DMSO	4	F	3	CB4856	median.TOF	209.5
812	20141028	dose	9	NA	bortezomib	2	DMSO	4	F	3	CB4856	norm.n	30.6666666666667
813	20141028	dose	9	NA	bortezomib	3	DMSO	4	F	4	CB4856	median.EXT	286
814	20141028	dose	9	NA	bortezomib	3	DMSO	4	F	4	CB4856	median.norm.EXT	1.72093023255814
815	20141028	dose	9	NA	bortezomib	3	DMSO	4	F	4	CB4856	median.TOF	162
816	20141028	dose	9	NA	bortezomib	3	DMSO	4	F	4	CB4856	norm.n	28.3333333333333
817	20141028	dose	9	NA	bortezomib	4	DMSO	4	F	5	CB4856	median.EXT	351
818	20141028	dose	9	NA	bortezomib	4	DMSO	4	F	5	CB4856	median.norm.EXT	1.96875
819	20141028	dose	9	NA	bortezomib	4	DMSO	4	F	5	CB4856	median.TOF	151
820	20141028	dose	9	NA	bortezomib	4	DMSO	4	F	5	CB4856	norm.n	20.3333333333333
821	20141028	dose	9	NA	bortezomib	0	DMSO	4	F	7	N2	median.EXT	564
822	20141028	dose	9	NA	bortezomib	0	DMSO	4	F	7	N2	median.norm.EXT	2.10810810810811
823	20141028	dose	9	NA	bortezomib	0	DMSO	4	F	7	N2	median.TOF	278
824	20141028	dose	9	NA	bortezomib	0	DMSO	4	F	7	N2	norm.n	133.666666666667
825	20141028	dose	9	NA	bortezomib	1	DMSO	4	F	8	N2	median.EXT	484
826	20141028	dose	9	NA	bortezomib	1	DMSO	4	F	8	N2	median.norm.EXT	2.00206611570248
827	20141028	dose	9	NA	bortezomib	1	DMSO	4	F	8	N2	median.TOF	246
828	20141028	dose	9	NA	bortezomib	1	DMSO	4	F	8	N2	norm.n	107.333333333333
829	20141028	dose	9	NA	bortezomib	2	DMSO	4	F	9	N2	median.EXT	468
830	20141028	dose	9	NA	bortezomib	2	DMSO	4	F	9	N2	median.norm.EXT	1.92374785958904
831	20141028	dose	9	NA	bortezomib	2	DMSO	4	F	9	N2	median.TOF	245.5
832	20141028	dose	9	NA	bortezomib	2	DMSO	4	F	9	N2	norm.n	79.3333333333333
833	20141028	dose	9	NA	bortezomib	3	DMSO	4	F	10	N2	median.EXT	412.5
834	20141028	dose	9	NA	bortezomib	3	DMSO	4	F	10	N2	median.norm.EXT	1.83172487745098
835	20141028	dose	9	NA	bortezomib	3	DMSO	4	F	10	N2	median.TOF	230
836	20141028	dose	9	NA	bortezomib	3	DMSO	4	F	10	N2	norm.n	55.3333333333333
837	20141028	dose	9	NA	bortezomib	4	DMSO	4	F	11	N2	median.EXT	337.5
838	20141028	dose	9	NA	bortezomib	4	DMSO	4	F	11	N2	median.norm.EXT	1.96034582970067
839	20141028	dose	9	NA	bortezomib	4	DMSO	4	F	11	N2	median.TOF	174.5
840	20141028	dose	9	NA	bortezomib	4	DMSO	4	F	11	N2	norm.n	21.3333333333333
841	20141028	dose	9	NA	bortezomib	0	DMSO	4	G	1	CB4856	median.EXT	483
842	20141028	dose	9	NA	bortezomib	0	DMSO	4	G	1	CB4856	median.norm.EXT	1.844627674688
843	20141028	dose	9	NA	bortezomib	0	DMSO	4	G	1	CB4856	median.TOF	249
844	20141028	dose	9	NA	bortezomib	0	DMSO	4	G	1	CB4856	norm.n	152.666666666667
845	20141028	dose	9	NA	bortezomib	1	DMSO	4	G	2	CB4856	median.EXT	436
846	20141028	dose	9	NA	bortezomib	1	DMSO	4	G	2	CB4856	median.norm.EXT	1.83057851239669
847	20141028	dose	9	NA	bortezomib	1	DMSO	4	G	2	CB4856	median.TOF	242
848	20141028	dose	9	NA	bortezomib	1	DMSO	4	G	2	CB4856	norm.n	107.666666666667
849	20141028	dose	9	NA	bortezomib	2	DMSO	4	G	3	CB4856	median.EXT	413.5
850	20141028	dose	9	NA	bortezomib	2	DMSO	4	G	3	CB4856	median.norm.EXT	1.87239440063574
851	20141028	dose	9	NA	bortezomib	2	DMSO	4	G	3	CB4856	median.TOF	230.5
852	20141028	dose	9	NA	bortezomib	2	DMSO	4	G	3	CB4856	norm.n	68
853	20141028	dose	9	NA	bortezomib	3	DMSO	4	G	4	CB4856	median.EXT	368
854	20141028	dose	9	NA	bortezomib	3	DMSO	4	G	4	CB4856	median.norm.EXT	1.67719298245614
855	20141028	dose	9	NA	bortezomib	3	DMSO	4	G	4	CB4856	median.TOF	200
856	20141028	dose	9	NA	bortezomib	3	DMSO	4	G	4	CB4856	norm.n	42.3333333333333
857	20141028	dose	9	NA	bortezomib	4	DMSO	4	G	5	CB4856	median.EXT	388
858	20141028	dose	9	NA	bortezomib	4	DMSO	4	G	5	CB4856	median.norm.EXT	1.86582763470585
859	20141028	dose	9	NA	bortezomib	4	DMSO	4	G	5	CB4856	median.TOF	169.5
860	20141028	dose	9	NA	bortezomib	4	DMSO	4	G	5	CB4856	norm.n	20
861	20141028	dose	9	NA	bortezomib	0	DMSO	4	G	7	JU258	median.EXT	930
862	20141028	dose	9	NA	bortezomib	0	DMSO	4	G	7	JU258	median.norm.EXT	2.54839978185367
863	20141028	dose	9	NA	bortezomib	0	DMSO	4	G	7	JU258	median.TOF	339
864	20141028	dose	9	NA	bortezomib	0	DMSO	4	G	7	JU258	norm.n	92.6666666666667
865	20141028	dose	9	NA	bortezomib	1	DMSO	4	G	8	JU258	median.EXT	388.5
866	20141028	dose	9	NA	bortezomib	1	DMSO	4	G	8	JU258	median.norm.EXT	2.47987355110643
867	20141028	dose	9	NA	bortezomib	1	DMSO	4	G	8	JU258	median.TOF	151
868	20141028	dose	9	NA	bortezomib	1	DMSO	4	G	8	JU258	norm.n	24
869	20141028	dose	9	NA	bortezomib	2	DMSO	4	G	9	JU258	median.EXT	316
870	20141028	dose	9	NA	bortezomib	2	DMSO	4	G	9	JU258	median.norm.EXT	2.87567567567568
871	20141028	dose	9	NA	bortezomib	2	DMSO	4	G	9	JU258	median.TOF	105
872	20141028	dose	9	NA	bortezomib	2	DMSO	4	G	9	JU258	norm.n	11
873	20141028	dose	9	NA	bortezomib	3	DMSO	4	G	10	JU258	median.EXT	194.5
874	20141028	dose	9	NA	bortezomib	3	DMSO	4	G	10	JU258	median.norm.EXT	2.48979963570128
875	20141028	dose	9	NA	bortezomib	3	DMSO	4	G	10	JU258	median.TOF	94.5
876	20141028	dose	9	NA	bortezomib	3	DMSO	4	G	10	JU258	norm.n	7.33333333333333
877	20141028	dose	9	NA	bortezomib	4	DMSO	4	G	11	JU258	median.EXT	484
878	20141028	dose	9	NA	bortezomib	4	DMSO	4	G	11	JU258	median.norm.EXT	3.25866076369674
879	20141028	dose	9	NA	bortezomib	4	DMSO	4	G	11	JU258	median.TOF	143.5
880	20141028	dose	9	NA	bortezomib	4	DMSO	4	G	11	JU258	norm.n	7.33333333333333
881	20141028	dose	9	NA	bortezomib	0	DMSO	4	H	1	N2	median.EXT	598
882	20141028	dose	9	NA	bortezomib	0	DMSO	4	H	1	N2	median.norm.EXT	2.04054054054054
883	20141028	dose	9	NA	bortezomib	0	DMSO	4	H	1	N2	median.TOF	296
884	20141028	dose	9	NA	bortezomib	0	DMSO	4	H	1	N2	norm.n	137.666666666667
885	20141028	dose	9	NA	bortezomib	2	DMSO	4	H	3	N2	median.EXT	541
886	20141028	dose	9	NA	bortezomib	2	DMSO	4	H	3	N2	median.norm.EXT	2.19682319250608
887	20141028	dose	9	NA	bortezomib	2	DMSO	4	H	3	N2	median.TOF	280
888	20141028	dose	9	NA	bortezomib	2	DMSO	4	H	3	N2	norm.n	29.3333333333333
889	20141028	dose	9	NA	bortezomib	3	DMSO	4	H	4	N2	median.EXT	293.5
890	20141028	dose	9	NA	bortezomib	3	DMSO	4	H	4	N2	median.norm.EXT	1.73341948165405
891	20141028	dose	9	NA	bortezomib	3	DMSO	4	H	4	N2	median.TOF	166
892	20141028	dose	9	NA	bortezomib	3	DMSO	4	H	4	N2	norm.n	12.6666666666667
893	20141028	dose	9	NA	bortezomib	4	DMSO	4	H	5	N2	median.EXT	279.5
894	20141028	dose	9	NA	bortezomib	4	DMSO	4	H	5	N2	median.norm.EXT	1.86719464701116
895	20141028	dose	9	NA	bortezomib	4	DMSO	4	H	5	N2	median.TOF	152
896	20141028	dose	9	NA	bortezomib	4	DMSO	4	H	5	N2	norm.n	20
897	20141028	dose	9	NA	bortezomib	0	DMSO	4	H	7	DL238	median.EXT	488.5
898	20141028	dose	9	NA	bortezomib	0	DMSO	4	H	7	DL238	median.norm.EXT	1.75589484864578
899	20141028	dose	9	NA	bortezomib	0	DMSO	4	H	7	DL238	median.TOF	270
900	20141028	dose	9	NA	bortezomib	0	DMSO	4	H	7	DL238	norm.n	160.666666666667
901	20141028	dose	9	NA	bortezomib	1	DMSO	4	H	8	DL238	median.EXT	493
902	20141028	dose	9	NA	bortezomib	1	DMSO	4	H	8	DL238	median.norm.EXT	2.42743696644828
903	20141028	dose	9	NA	bortezomib	1	DMSO	4	H	8	DL238	median.TOF	244
904	20141028	dose	9	NA	bortezomib	1	DMSO	4	H	8	DL238	norm.n	82
905	20141028	dose	9	NA	bortezomib	2	DMSO	4	H	9	DL238	median.EXT	443
906	20141028	dose	9	NA	bortezomib	2	DMSO	4	H	9	DL238	median.norm.EXT	2.24688279301746
907	20141028	dose	9	NA	bortezomib	2	DMSO	4	H	9	DL238	median.TOF	202
908	20141028	dose	9	NA	bortezomib	2	DMSO	4	H	9	DL238	norm.n	58.3333333333333
909	20141028	dose	9	NA	bortezomib	3	DMSO	4	H	10	DL238	median.EXT	260
910	20141028	dose	9	NA	bortezomib	3	DMSO	4	H	10	DL238	median.norm.EXT	2.37194736842105
911	20141028	dose	9	NA	bortezomib	3	DMSO	4	H	10	DL238	median.TOF	100
912	20141028	dose	9	NA	bortezomib	3	DMSO	4	H	10	DL238	norm.n	10
913	20141028	dose	9	NA	bortezomib	4	DMSO	4	H	11	DL238	median.EXT	416
914	20141028	dose	9	NA	bortezomib	4	DMSO	4	H	11	DL238	median.norm.EXT	1.78834841628959
915	20141028	dose	9	NA	bortezomib	4	DMSO	4	H	11	DL238	median.TOF	245
916	20141028	dose	9	NA	bortezomib	4	DMSO	4	H	11	DL238	norm.n	54
917	20141028	dose	9	NA	carmustine	0	DMSO	5	A	1	N2	median.EXT	622.5
918	20141028	dose	9	NA	carmustine	0	DMSO	5	A	1	N2	median.norm.EXT	2.24456873315364
919	20141028	dose	9	NA	carmustine	0	DMSO	5	A	1	N2	median.TOF	305
920	20141028	dose	9	NA	carmustine	0	DMSO	5	A	1	N2	norm.n	108
921	20141028	dose	9	NA	carmustine	125	DMSO	5	A	2	N2	median.EXT	579
922	20141028	dose	9	NA	carmustine	125	DMSO	5	A	2	N2	median.norm.EXT	2.08996206340208
923	20141028	dose	9	NA	carmustine	125	DMSO	5	A	2	N2	median.TOF	280.5
924	20141028	dose	9	NA	carmustine	125	DMSO	5	A	2	N2	norm.n	91.3333333333333
925	20141028	dose	9	NA	carmustine	250	DMSO	5	A	3	N2	median.EXT	322.5
926	20141028	dose	9	NA	carmustine	250	DMSO	5	A	3	N2	median.norm.EXT	1.89285714285714
927	20141028	dose	9	NA	carmustine	250	DMSO	5	A	3	N2	median.TOF	189
928	20141028	dose	9	NA	carmustine	250	DMSO	5	A	3	N2	norm.n	24.6666666666667
929	20141028	dose	9	NA	carmustine	500	DMSO	5	A	4	N2	median.EXT	473
930	20141028	dose	9	NA	carmustine	500	DMSO	5	A	4	N2	median.norm.EXT	2.02857142857143
931	20141028	dose	9	NA	carmustine	500	DMSO	5	A	4	N2	median.TOF	277
932	20141028	dose	9	NA	carmustine	500	DMSO	5	A	4	N2	norm.n	15
933	20141028	dose	9	NA	carmustine	1000	DMSO	5	A	5	N2	median.EXT	358
934	20141028	dose	9	NA	carmustine	1000	DMSO	5	A	5	N2	median.norm.EXT	2.60919540229885
935	20141028	dose	9	NA	carmustine	1000	DMSO	5	A	5	N2	median.TOF	122
936	20141028	dose	9	NA	carmustine	1000	DMSO	5	A	5	N2	norm.n	4.33333333333333
937	20141028	dose	9	NA	carmustine	0	DMSO	5	A	7	CB4856	median.EXT	622
938	20141028	dose	9	NA	carmustine	0	DMSO	5	A	7	CB4856	median.norm.EXT	2.29473684210526
939	20141028	dose	9	NA	carmustine	0	DMSO	5	A	7	CB4856	median.TOF	303
940	20141028	dose	9	NA	carmustine	0	DMSO	5	A	7	CB4856	norm.n	90.3333333333333
941	20141028	dose	9	NA	carmustine	125	DMSO	5	A	8	CB4856	median.EXT	523.5
942	20141028	dose	9	NA	carmustine	125	DMSO	5	A	8	CB4856	median.norm.EXT	2.1328125
943	20141028	dose	9	NA	carmustine	125	DMSO	5	A	8	CB4856	median.TOF	262.5
944	20141028	dose	9	NA	carmustine	125	DMSO	5	A	8	CB4856	norm.n	80
945	20141028	dose	9	NA	carmustine	250	DMSO	5	A	9	CB4856	median.EXT	351
946	20141028	dose	9	NA	carmustine	250	DMSO	5	A	9	CB4856	median.norm.EXT	2.30846846846847
947	20141028	dose	9	NA	carmustine	250	DMSO	5	A	9	CB4856	median.TOF	157.5
948	20141028	dose	9	NA	carmustine	250	DMSO	5	A	9	CB4856	norm.n	37.3333333333333
949	20141028	dose	9	NA	carmustine	500	DMSO	5	A	10	CB4856	median.EXT	186
950	20141028	dose	9	NA	carmustine	500	DMSO	5	A	10	CB4856	median.norm.EXT	2.23076923076923
951	20141028	dose	9	NA	carmustine	500	DMSO	5	A	10	CB4856	median.TOF	89
952	20141028	dose	9	NA	carmustine	500	DMSO	5	A	10	CB4856	norm.n	8.33333333333333
953	20141028	dose	9	NA	carmustine	1000	DMSO	5	A	11	CB4856	median.EXT	238
954	20141028	dose	9	NA	carmustine	1000	DMSO	5	A	11	CB4856	median.norm.EXT	2.35227272727273
955	20141028	dose	9	NA	carmustine	1000	DMSO	5	A	11	CB4856	median.TOF	94
956	20141028	dose	9	NA	carmustine	1000	DMSO	5	A	11	CB4856	norm.n	11
957	20141028	dose	9	NA	carmustine	0	DMSO	5	B	1	DL238	median.EXT	555
958	20141028	dose	9	NA	carmustine	0	DMSO	5	B	1	DL238	median.norm.EXT	1.99335548172757
959	20141028	dose	9	NA	carmustine	0	DMSO	5	B	1	DL238	median.TOF	276
960	20141028	dose	9	NA	carmustine	0	DMSO	5	B	1	DL238	norm.n	169.666666666667
961	20141028	dose	9	NA	carmustine	125	DMSO	5	B	2	DL238	median.EXT	462
962	20141028	dose	9	NA	carmustine	125	DMSO	5	B	2	DL238	median.norm.EXT	2.12698412698413
963	20141028	dose	9	NA	carmustine	125	DMSO	5	B	2	DL238	median.TOF	239
964	20141028	dose	9	NA	carmustine	125	DMSO	5	B	2	DL238	norm.n	73.6666666666667
965	20141028	dose	9	NA	carmustine	250	DMSO	5	B	3	DL238	median.EXT	283
966	20141028	dose	9	NA	carmustine	250	DMSO	5	B	3	DL238	median.norm.EXT	2.59412124923454
967	20141028	dose	9	NA	carmustine	250	DMSO	5	B	3	DL238	median.TOF	116
968	20141028	dose	9	NA	carmustine	250	DMSO	5	B	3	DL238	norm.n	22.6666666666667
969	20141028	dose	9	NA	carmustine	500	DMSO	5	B	4	DL238	median.EXT	262
970	20141028	dose	9	NA	carmustine	500	DMSO	5	B	4	DL238	median.norm.EXT	2.95984848484848
971	20141028	dose	9	NA	carmustine	500	DMSO	5	B	4	DL238	median.TOF	92.5
972	20141028	dose	9	NA	carmustine	500	DMSO	5	B	4	DL238	norm.n	11.3333333333333
973	20141028	dose	9	NA	carmustine	1000	DMSO	5	B	5	DL238	median.EXT	204
974	20141028	dose	9	NA	carmustine	1000	DMSO	5	B	5	DL238	median.norm.EXT	2.55714285714286
975	20141028	dose	9	NA	carmustine	1000	DMSO	5	B	5	DL238	median.TOF	75
976	20141028	dose	9	NA	carmustine	1000	DMSO	5	B	5	DL238	norm.n	14.3333333333333
977	20141028	dose	9	NA	carmustine	0	DMSO	5	B	7	JU258	median.EXT	918.5
978	20141028	dose	9	NA	carmustine	0	DMSO	5	B	7	JU258	median.norm.EXT	2.76229460749047
979	20141028	dose	9	NA	carmustine	0	DMSO	5	B	7	JU258	median.TOF	321
980	20141028	dose	9	NA	carmustine	0	DMSO	5	B	7	JU258	norm.n	76.6666666666667
981	20141028	dose	9	NA	carmustine	125	DMSO	5	B	8	JU258	median.EXT	453.5
982	20141028	dose	9	NA	carmustine	125	DMSO	5	B	8	JU258	median.norm.EXT	2.10849673202614
983	20141028	dose	9	NA	carmustine	125	DMSO	5	B	8	JU258	median.TOF	201
984	20141028	dose	9	NA	carmustine	125	DMSO	5	B	8	JU258	norm.n	46
985	20141028	dose	9	NA	carmustine	250	DMSO	5	B	9	JU258	median.EXT	228
986	20141028	dose	9	NA	carmustine	250	DMSO	5	B	9	JU258	median.norm.EXT	1.98529411764706
987	20141028	dose	9	NA	carmustine	250	DMSO	5	B	9	JU258	median.TOF	112
988	20141028	dose	9	NA	carmustine	250	DMSO	5	B	9	JU258	norm.n	15
989	20141028	dose	9	NA	carmustine	500	DMSO	5	B	10	JU258	median.EXT	250
990	20141028	dose	9	NA	carmustine	500	DMSO	5	B	10	JU258	median.norm.EXT	2.4208587398374
991	20141028	dose	9	NA	carmustine	500	DMSO	5	B	10	JU258	median.TOF	83
992	20141028	dose	9	NA	carmustine	500	DMSO	5	B	10	JU258	norm.n	10
993	20141028	dose	9	NA	carmustine	1000	DMSO	5	B	11	JU258	median.EXT	255
994	20141028	dose	9	NA	carmustine	1000	DMSO	5	B	11	JU258	median.norm.EXT	2.64911064911065
995	20141028	dose	9	NA	carmustine	1000	DMSO	5	B	11	JU258	median.TOF	90
996	20141028	dose	9	NA	carmustine	1000	DMSO	5	B	11	JU258	norm.n	11.3333333333333
997	20141028	dose	9	NA	carmustine	0	DMSO	5	C	1	DL238	median.EXT	575.5
998	20141028	dose	9	NA	carmustine	0	DMSO	5	C	1	DL238	median.norm.EXT	1.97951563000107
999	20141028	dose	9	NA	carmustine	0	DMSO	5	C	1	DL238	median.TOF	295
1000	20141028	dose	9	NA	carmustine	0	DMSO	5	C	1	DL238	norm.n	114.666666666667
1001	20141028	dose	9	NA	carmustine	125	DMSO	5	C	2	DL238	median.EXT	375
1002	20141028	dose	9	NA	carmustine	125	DMSO	5	C	2	DL238	median.norm.EXT	1.8745247148289
1003	20141028	dose	9	NA	carmustine	125	DMSO	5	C	2	DL238	median.TOF	198
1004	20141028	dose	9	NA	carmustine	125	DMSO	5	C	2	DL238	norm.n	35.6666666666667
1005	20141028	dose	9	NA	carmustine	250	DMSO	5	C	3	DL238	median.EXT	251.5
1006	20141028	dose	9	NA	carmustine	250	DMSO	5	C	3	DL238	median.norm.EXT	2.75980498374865
1007	20141028	dose	9	NA	carmustine	250	DMSO	5	C	3	DL238	median.TOF	112
1008	20141028	dose	9	NA	carmustine	250	DMSO	5	C	3	DL238	norm.n	22
1009	20141028	dose	9	NA	carmustine	500	DMSO	5	C	4	DL238	median.EXT	172
1010	20141028	dose	9	NA	carmustine	500	DMSO	5	C	4	DL238	median.norm.EXT	2.21774193548387
1011	20141028	dose	9	NA	carmustine	500	DMSO	5	C	4	DL238	median.TOF	79
1012	20141028	dose	9	NA	carmustine	500	DMSO	5	C	4	DL238	norm.n	10.3333333333333
1013	20141028	dose	9	NA	carmustine	1000	DMSO	5	C	5	DL238	median.EXT	276
1014	20141028	dose	9	NA	carmustine	1000	DMSO	5	C	5	DL238	median.norm.EXT	3.12352941176471
1015	20141028	dose	9	NA	carmustine	1000	DMSO	5	C	5	DL238	median.TOF	90
1016	20141028	dose	9	NA	carmustine	1000	DMSO	5	C	5	DL238	norm.n	10.6666666666667
1017	20141028	dose	9	NA	carmustine	0	DMSO	5	C	7	N2	median.EXT	594.5
1018	20141028	dose	9	NA	carmustine	0	DMSO	5	C	7	N2	median.norm.EXT	2.12843477973058
1019	20141028	dose	9	NA	carmustine	0	DMSO	5	C	7	N2	median.TOF	276.5
1020	20141028	dose	9	NA	carmustine	0	DMSO	5	C	7	N2	norm.n	115.333333333333
1021	20141028	dose	9	NA	carmustine	125	DMSO	5	C	8	N2	median.EXT	499
1022	20141028	dose	9	NA	carmustine	125	DMSO	5	C	8	N2	median.norm.EXT	2.11361249309011
1023	20141028	dose	9	NA	carmustine	125	DMSO	5	C	8	N2	median.TOF	246.5
1024	20141028	dose	9	NA	carmustine	125	DMSO	5	C	8	N2	norm.n	74
1025	20141028	dose	9	NA	carmustine	250	DMSO	5	C	9	N2	median.EXT	382
1026	20141028	dose	9	NA	carmustine	250	DMSO	5	C	9	N2	median.norm.EXT	2.3010158387926
1027	20141028	dose	9	NA	carmustine	250	DMSO	5	C	9	N2	median.TOF	209.5
1028	20141028	dose	9	NA	carmustine	250	DMSO	5	C	9	N2	norm.n	38
1029	20141028	dose	9	NA	carmustine	500	DMSO	5	C	10	N2	median.EXT	280
1030	20141028	dose	9	NA	carmustine	500	DMSO	5	C	10	N2	median.norm.EXT	3.03496503496504
1031	20141028	dose	9	NA	carmustine	500	DMSO	5	C	10	N2	median.TOF	87
1032	20141028	dose	9	NA	carmustine	500	DMSO	5	C	10	N2	norm.n	17.6666666666667
1033	20141028	dose	9	NA	carmustine	1000	DMSO	5	C	11	N2	median.EXT	261
1034	20141028	dose	9	NA	carmustine	1000	DMSO	5	C	11	N2	median.norm.EXT	3.04918032786885
1035	20141028	dose	9	NA	carmustine	1000	DMSO	5	C	11	N2	median.TOF	96
1036	20141028	dose	9	NA	carmustine	1000	DMSO	5	C	11	N2	norm.n	14.3333333333333
1037	20141028	dose	9	NA	carmustine	0	DMSO	5	D	1	JU258	median.EXT	631
1038	20141028	dose	9	NA	carmustine	0	DMSO	5	D	1	JU258	median.norm.EXT	2.27427511561268
1039	20141028	dose	9	NA	carmustine	0	DMSO	5	D	1	JU258	median.TOF	299
1040	20141028	dose	9	NA	carmustine	0	DMSO	5	D	1	JU258	norm.n	98
1041	20141028	dose	9	NA	carmustine	125	DMSO	5	D	2	JU258	median.EXT	425.5
1042	20141028	dose	9	NA	carmustine	125	DMSO	5	D	2	JU258	median.norm.EXT	2.28285399953267
1043	20141028	dose	9	NA	carmustine	125	DMSO	5	D	2	JU258	median.TOF	195.5
1044	20141028	dose	9	NA	carmustine	125	DMSO	5	D	2	JU258	norm.n	44.6666666666667
1045	20141028	dose	9	NA	carmustine	250	DMSO	5	D	3	JU258	median.EXT	305.5
1046	20141028	dose	9	NA	carmustine	250	DMSO	5	D	3	JU258	median.norm.EXT	2.53454157782516
1047	20141028	dose	9	NA	carmustine	250	DMSO	5	D	3	JU258	median.TOF	126.5
1048	20141028	dose	9	NA	carmustine	250	DMSO	5	D	3	JU258	norm.n	16.6666666666667
1049	20141028	dose	9	NA	carmustine	500	DMSO	5	D	4	JU258	median.EXT	234
1050	20141028	dose	9	NA	carmustine	500	DMSO	5	D	4	JU258	median.norm.EXT	2.63302752293578
1051	20141028	dose	9	NA	carmustine	500	DMSO	5	D	4	JU258	median.TOF	82
1052	20141028	dose	9	NA	carmustine	500	DMSO	5	D	4	JU258	norm.n	14.3333333333333
1053	20141028	dose	9	NA	carmustine	1000	DMSO	5	D	5	JU258	median.EXT	208
1054	20141028	dose	9	NA	carmustine	1000	DMSO	5	D	5	JU258	median.norm.EXT	2.5679012345679
1055	20141028	dose	9	NA	carmustine	1000	DMSO	5	D	5	JU258	median.TOF	75
1056	20141028	dose	9	NA	carmustine	1000	DMSO	5	D	5	JU258	norm.n	10.3333333333333
1057	20141028	dose	9	NA	carmustine	0	DMSO	5	D	7	CB4856	median.EXT	502
1058	20141028	dose	9	NA	carmustine	0	DMSO	5	D	7	CB4856	median.norm.EXT	1.86159169550173
1059	20141028	dose	9	NA	carmustine	0	DMSO	5	D	7	CB4856	median.TOF	272
1060	20141028	dose	9	NA	carmustine	0	DMSO	5	D	7	CB4856	norm.n	196.333333333333
1061	20141028	dose	9	NA	carmustine	125	DMSO	5	D	8	CB4856	median.EXT	498
1062	20141028	dose	9	NA	carmustine	125	DMSO	5	D	8	CB4856	median.norm.EXT	1.89828405602052
1063	20141028	dose	9	NA	carmustine	125	DMSO	5	D	8	CB4856	median.TOF	258.5
1064	20141028	dose	9	NA	carmustine	125	DMSO	5	D	8	CB4856	norm.n	117.333333333333
1065	20141028	dose	9	NA	carmustine	250	DMSO	5	D	9	CB4856	median.EXT	356
1066	20141028	dose	9	NA	carmustine	250	DMSO	5	D	9	CB4856	median.norm.EXT	2.16129032258065
1067	20141028	dose	9	NA	carmustine	250	DMSO	5	D	9	CB4856	median.TOF	176
1068	20141028	dose	9	NA	carmustine	250	DMSO	5	D	9	CB4856	norm.n	29.6666666666667
1069	20141028	dose	9	NA	carmustine	500	DMSO	5	D	10	CB4856	median.EXT	284
1070	20141028	dose	9	NA	carmustine	500	DMSO	5	D	10	CB4856	median.norm.EXT	2.56451612903226
1071	20141028	dose	9	NA	carmustine	500	DMSO	5	D	10	CB4856	median.TOF	104
1072	20141028	dose	9	NA	carmustine	500	DMSO	5	D	10	CB4856	norm.n	13
1073	20141028	dose	9	NA	carmustine	1000	DMSO	5	D	11	CB4856	median.EXT	201.5
1074	20141028	dose	9	NA	carmustine	1000	DMSO	5	D	11	CB4856	median.norm.EXT	2.26698412698413
1075	20141028	dose	9	NA	carmustine	1000	DMSO	5	D	11	CB4856	median.TOF	81
1076	20141028	dose	9	NA	carmustine	1000	DMSO	5	D	11	CB4856	norm.n	14
1077	20141028	dose	9	NA	carmustine	0	DMSO	5	E	1	JU258	median.EXT	745
1078	20141028	dose	9	NA	carmustine	0	DMSO	5	E	1	JU258	median.norm.EXT	2.32804232804233
1079	20141028	dose	9	NA	carmustine	0	DMSO	5	E	1	JU258	median.TOF	321
1080	20141028	dose	9	NA	carmustine	0	DMSO	5	E	1	JU258	norm.n	97
1081	20141028	dose	9	NA	carmustine	125	DMSO	5	E	2	JU258	median.EXT	393
1082	20141028	dose	9	NA	carmustine	125	DMSO	5	E	2	JU258	median.norm.EXT	1.88053097345133
1083	20141028	dose	9	NA	carmustine	125	DMSO	5	E	2	JU258	median.TOF	212
1084	20141028	dose	9	NA	carmustine	125	DMSO	5	E	2	JU258	norm.n	76.3333333333333
1085	20141028	dose	9	NA	carmustine	250	DMSO	5	E	3	JU258	median.EXT	224
1086	20141028	dose	9	NA	carmustine	250	DMSO	5	E	3	JU258	median.norm.EXT	1.73770491803279
1087	20141028	dose	9	NA	carmustine	250	DMSO	5	E	3	JU258	median.TOF	127
1088	20141028	dose	9	NA	carmustine	250	DMSO	5	E	3	JU258	norm.n	14.3333333333333
1089	20141028	dose	9	NA	carmustine	500	DMSO	5	E	4	JU258	median.EXT	190.5
1090	20141028	dose	9	NA	carmustine	500	DMSO	5	E	4	JU258	median.norm.EXT	2.15590354767184
1091	20141028	dose	9	NA	carmustine	500	DMSO	5	E	4	JU258	median.TOF	84.5
1092	20141028	dose	9	NA	carmustine	500	DMSO	5	E	4	JU258	norm.n	4.66666666666667
1093	20141028	dose	9	NA	carmustine	1000	DMSO	5	E	5	JU258	median.EXT	236
1094	20141028	dose	9	NA	carmustine	1000	DMSO	5	E	5	JU258	median.norm.EXT	2.21551724137931
1095	20141028	dose	9	NA	carmustine	1000	DMSO	5	E	5	JU258	median.TOF	105
1096	20141028	dose	9	NA	carmustine	1000	DMSO	5	E	5	JU258	norm.n	7
1097	20141028	dose	9	NA	carmustine	0	DMSO	5	E	7	DL238	median.EXT	671
1098	20141028	dose	9	NA	carmustine	0	DMSO	5	E	7	DL238	median.norm.EXT	2.1786358419413
1099	20141028	dose	9	NA	carmustine	0	DMSO	5	E	7	DL238	median.TOF	320.5
1100	20141028	dose	9	NA	carmustine	0	DMSO	5	E	7	DL238	norm.n	90
1101	20141028	dose	9	NA	carmustine	125	DMSO	5	E	8	DL238	median.EXT	451
1102	20141028	dose	9	NA	carmustine	125	DMSO	5	E	8	DL238	median.norm.EXT	1.92498155176049
1103	20141028	dose	9	NA	carmustine	125	DMSO	5	E	8	DL238	median.TOF	218.5
1104	20141028	dose	9	NA	carmustine	125	DMSO	5	E	8	DL238	norm.n	42
1105	20141028	dose	9	NA	carmustine	250	DMSO	5	E	9	DL238	median.EXT	330
1106	20141028	dose	9	NA	carmustine	250	DMSO	5	E	9	DL238	median.norm.EXT	2.5
1107	20141028	dose	9	NA	carmustine	250	DMSO	5	E	9	DL238	median.TOF	157
1108	20141028	dose	9	NA	carmustine	250	DMSO	5	E	9	DL238	norm.n	12.3333333333333
1109	20141028	dose	9	NA	carmustine	500	DMSO	5	E	10	DL238	median.EXT	288
1110	20141028	dose	9	NA	carmustine	500	DMSO	5	E	10	DL238	median.norm.EXT	3.74025974025974
1111	20141028	dose	9	NA	carmustine	500	DMSO	5	E	10	DL238	median.TOF	96
1112	20141028	dose	9	NA	carmustine	500	DMSO	5	E	10	DL238	norm.n	7.66666666666667
1113	20141028	dose	9	NA	carmustine	1000	DMSO	5	E	11	DL238	median.EXT	263
1114	20141028	dose	9	NA	carmustine	1000	DMSO	5	E	11	DL238	median.norm.EXT	2.95945945945946
1115	20141028	dose	9	NA	carmustine	1000	DMSO	5	E	11	DL238	median.TOF	83.5
1116	20141028	dose	9	NA	carmustine	1000	DMSO	5	E	11	DL238	norm.n	14.6666666666667
1117	20141028	dose	9	NA	carmustine	0	DMSO	5	F	1	CB4856	median.EXT	522
1118	20141028	dose	9	NA	carmustine	0	DMSO	5	F	1	CB4856	median.norm.EXT	1.90136054421769
1119	20141028	dose	9	NA	carmustine	0	DMSO	5	F	1	CB4856	median.TOF	274
1120	20141028	dose	9	NA	carmustine	0	DMSO	5	F	1	CB4856	norm.n	133.666666666667
1121	20141028	dose	9	NA	carmustine	125	DMSO	5	F	2	CB4856	median.EXT	494
1122	20141028	dose	9	NA	carmustine	125	DMSO	5	F	2	CB4856	median.norm.EXT	2.08461538461538
1123	20141028	dose	9	NA	carmustine	125	DMSO	5	F	2	CB4856	median.TOF	247
1124	20141028	dose	9	NA	carmustine	125	DMSO	5	F	2	CB4856	norm.n	67.6666666666667
1125	20141028	dose	9	NA	carmustine	250	DMSO	5	F	3	CB4856	median.EXT	478
1126	20141028	dose	9	NA	carmustine	250	DMSO	5	F	3	CB4856	median.norm.EXT	2.19582245430809
1127	20141028	dose	9	NA	carmustine	250	DMSO	5	F	3	CB4856	median.TOF	216
1128	20141028	dose	9	NA	carmustine	250	DMSO	5	F	3	CB4856	norm.n	38.3333333333333
1129	20141028	dose	9	NA	carmustine	500	DMSO	5	F	4	CB4856	median.EXT	396
1130	20141028	dose	9	NA	carmustine	500	DMSO	5	F	4	CB4856	median.norm.EXT	2.625
1131	20141028	dose	9	NA	carmustine	500	DMSO	5	F	4	CB4856	median.TOF	191
1132	20141028	dose	9	NA	carmustine	500	DMSO	5	F	4	CB4856	norm.n	21.6666666666667
1133	20141028	dose	9	NA	carmustine	1000	DMSO	5	F	5	CB4856	median.EXT	184.5
1134	20141028	dose	9	NA	carmustine	1000	DMSO	5	F	5	CB4856	median.norm.EXT	1.84440996897207
1135	20141028	dose	9	NA	carmustine	1000	DMSO	5	F	5	CB4856	median.TOF	86.5
1136	20141028	dose	9	NA	carmustine	1000	DMSO	5	F	5	CB4856	norm.n	7.33333333333333
1137	20141028	dose	9	NA	carmustine	0	DMSO	5	F	7	N2	median.EXT	712
1138	20141028	dose	9	NA	carmustine	0	DMSO	5	F	7	N2	median.norm.EXT	2.05801695045252
1139	20141028	dose	9	NA	carmustine	0	DMSO	5	F	7	N2	median.TOF	316
1140	20141028	dose	9	NA	carmustine	0	DMSO	5	F	7	N2	norm.n	104
1141	20141028	dose	9	NA	carmustine	125	DMSO	5	F	8	N2	median.EXT	537
1142	20141028	dose	9	NA	carmustine	125	DMSO	5	F	8	N2	median.norm.EXT	2.29881119145875
1143	20141028	dose	9	NA	carmustine	125	DMSO	5	F	8	N2	median.TOF	245
1144	20141028	dose	9	NA	carmustine	125	DMSO	5	F	8	N2	norm.n	79.3333333333333
1145	20141028	dose	9	NA	carmustine	250	DMSO	5	F	9	N2	median.EXT	355
1146	20141028	dose	9	NA	carmustine	250	DMSO	5	F	9	N2	median.norm.EXT	2.02014718740892
1147	20141028	dose	9	NA	carmustine	250	DMSO	5	F	9	N2	median.TOF	178
1148	20141028	dose	9	NA	carmustine	250	DMSO	5	F	9	N2	norm.n	42.6666666666667
1149	20141028	dose	9	NA	carmustine	500	DMSO	5	F	10	N2	median.EXT	259
1150	20141028	dose	9	NA	carmustine	500	DMSO	5	F	10	N2	median.norm.EXT	2.16623376623377
1151	20141028	dose	9	NA	carmustine	500	DMSO	5	F	10	N2	median.TOF	126
1152	20141028	dose	9	NA	carmustine	500	DMSO	5	F	10	N2	norm.n	9
1153	20141028	dose	9	NA	carmustine	1000	DMSO	5	F	11	N2	median.EXT	211
1154	20141028	dose	9	NA	carmustine	1000	DMSO	5	F	11	N2	median.norm.EXT	2.71375421462621
1155	20141028	dose	9	NA	carmustine	1000	DMSO	5	F	11	N2	median.TOF	80.5
1156	20141028	dose	9	NA	carmustine	1000	DMSO	5	F	11	N2	norm.n	8.66666666666667
1157	20141028	dose	9	NA	carmustine	0	DMSO	5	G	1	CB4856	median.EXT	606
1158	20141028	dose	9	NA	carmustine	0	DMSO	5	G	1	CB4856	median.norm.EXT	1.93811079545455
1159	20141028	dose	9	NA	carmustine	0	DMSO	5	G	1	CB4856	median.TOF	308
1160	20141028	dose	9	NA	carmustine	0	DMSO	5	G	1	CB4856	norm.n	127.333333333333
1161	20141028	dose	9	NA	carmustine	125	DMSO	5	G	2	CB4856	median.EXT	584
1162	20141028	dose	9	NA	carmustine	125	DMSO	5	G	2	CB4856	median.norm.EXT	2.00002866698519
1163	20141028	dose	9	NA	carmustine	125	DMSO	5	G	2	CB4856	median.TOF	292.5
1164	20141028	dose	9	NA	carmustine	125	DMSO	5	G	2	CB4856	norm.n	106.666666666667
1165	20141028	dose	9	NA	carmustine	250	DMSO	5	G	3	CB4856	median.EXT	593
1166	20141028	dose	9	NA	carmustine	250	DMSO	5	G	3	CB4856	median.norm.EXT	2.08225054727773
1167	20141028	dose	9	NA	carmustine	250	DMSO	5	G	3	CB4856	median.TOF	280.5
1168	20141028	dose	9	NA	carmustine	250	DMSO	5	G	3	CB4856	norm.n	45.3333333333333
1169	20141028	dose	9	NA	carmustine	500	DMSO	5	G	4	CB4856	median.EXT	405
1170	20141028	dose	9	NA	carmustine	500	DMSO	5	G	4	CB4856	median.norm.EXT	2.07231920199501
1171	20141028	dose	9	NA	carmustine	500	DMSO	5	G	4	CB4856	median.TOF	220
1172	20141028	dose	9	NA	carmustine	500	DMSO	5	G	4	CB4856	norm.n	17
1173	20141028	dose	9	NA	carmustine	1000	DMSO	5	G	5	CB4856	median.EXT	375
1174	20141028	dose	9	NA	carmustine	1000	DMSO	5	G	5	CB4856	median.norm.EXT	2.83801369863014
1175	20141028	dose	9	NA	carmustine	1000	DMSO	5	G	5	CB4856	median.TOF	139.5
1176	20141028	dose	9	NA	carmustine	1000	DMSO	5	G	5	CB4856	norm.n	4
1177	20141028	dose	9	NA	carmustine	0	DMSO	5	G	7	JU258	median.EXT	612
1178	20141028	dose	9	NA	carmustine	0	DMSO	5	G	7	JU258	median.norm.EXT	2.08852459016393
1179	20141028	dose	9	NA	carmustine	0	DMSO	5	G	7	JU258	median.TOF	295
1180	20141028	dose	9	NA	carmustine	0	DMSO	5	G	7	JU258	norm.n	115
1181	20141028	dose	9	NA	carmustine	125	DMSO	5	G	8	JU258	median.EXT	518
1182	20141028	dose	9	NA	carmustine	125	DMSO	5	G	8	JU258	median.norm.EXT	2.05970149253731
1183	20141028	dose	9	NA	carmustine	125	DMSO	5	G	8	JU258	median.TOF	254
1184	20141028	dose	9	NA	carmustine	125	DMSO	5	G	8	JU258	norm.n	81
1185	20141028	dose	9	NA	carmustine	250	DMSO	5	G	9	JU258	median.EXT	300.5
1186	20141028	dose	9	NA	carmustine	250	DMSO	5	G	9	JU258	median.norm.EXT	1.78315018315018
1187	20141028	dose	9	NA	carmustine	250	DMSO	5	G	9	JU258	median.TOF	161.5
1188	20141028	dose	9	NA	carmustine	250	DMSO	5	G	9	JU258	norm.n	27.3333333333333
1189	20141028	dose	9	NA	carmustine	500	DMSO	5	G	10	JU258	median.EXT	377
1190	20141028	dose	9	NA	carmustine	500	DMSO	5	G	10	JU258	median.norm.EXT	2.06349206349206
1191	20141028	dose	9	NA	carmustine	500	DMSO	5	G	10	JU258	median.TOF	133
1192	20141028	dose	9	NA	carmustine	500	DMSO	5	G	10	JU258	norm.n	5
1193	20141028	dose	9	NA	carmustine	1000	DMSO	5	G	11	JU258	median.EXT	210
1194	20141028	dose	9	NA	carmustine	1000	DMSO	5	G	11	JU258	median.norm.EXT	2.64454976303318
1195	20141028	dose	9	NA	carmustine	1000	DMSO	5	G	11	JU258	median.TOF	82
1196	20141028	dose	9	NA	carmustine	1000	DMSO	5	G	11	JU258	norm.n	9
1197	20141028	dose	9	NA	carmustine	0	DMSO	5	H	1	N2	median.EXT	605.5
1198	20141028	dose	9	NA	carmustine	0	DMSO	5	H	1	N2	median.norm.EXT	2.01053618711386
1199	20141028	dose	9	NA	carmustine	0	DMSO	5	H	1	N2	median.TOF	310
1200	20141028	dose	9	NA	carmustine	0	DMSO	5	H	1	N2	norm.n	115.333333333333
1201	20141028	dose	9	NA	carmustine	250	DMSO	5	H	3	N2	median.EXT	429
1202	20141028	dose	9	NA	carmustine	250	DMSO	5	H	3	N2	median.norm.EXT	2.21261682242991
1203	20141028	dose	9	NA	carmustine	250	DMSO	5	H	3	N2	median.TOF	199
1204	20141028	dose	9	NA	carmustine	250	DMSO	5	H	3	N2	norm.n	21.6666666666667
1205	20141028	dose	9	NA	carmustine	500	DMSO	5	H	4	N2	median.EXT	243
1206	20141028	dose	9	NA	carmustine	500	DMSO	5	H	4	N2	median.norm.EXT	1.74449360392421
1207	20141028	dose	9	NA	carmustine	500	DMSO	5	H	4	N2	median.TOF	93.5
1208	20141028	dose	9	NA	carmustine	500	DMSO	5	H	4	N2	norm.n	8.66666666666667
1209	20141028	dose	9	NA	carmustine	1000	DMSO	5	H	5	N2	median.EXT	212.5
1210	20141028	dose	9	NA	carmustine	1000	DMSO	5	H	5	N2	median.norm.EXT	2.32211693331902
1211	20141028	dose	9	NA	carmustine	1000	DMSO	5	H	5	N2	median.TOF	91.5
1212	20141028	dose	9	NA	carmustine	1000	DMSO	5	H	5	N2	norm.n	4.66666666666667
1213	20141028	dose	9	NA	carmustine	0	DMSO	5	H	7	DL238	median.EXT	578
1214	20141028	dose	9	NA	carmustine	0	DMSO	5	H	7	DL238	median.norm.EXT	1.95481927710843
1215	20141028	dose	9	NA	carmustine	0	DMSO	5	H	7	DL238	median.TOF	293
1216	20141028	dose	9	NA	carmustine	0	DMSO	5	H	7	DL238	norm.n	111.666666666667
1217	20141028	dose	9	NA	carmustine	125	DMSO	5	H	8	DL238	median.EXT	417.5
1218	20141028	dose	9	NA	carmustine	125	DMSO	5	H	8	DL238	median.norm.EXT	1.91891151720361
1219	20141028	dose	9	NA	carmustine	125	DMSO	5	H	8	DL238	median.TOF	198
1220	20141028	dose	9	NA	carmustine	125	DMSO	5	H	8	DL238	norm.n	56
1221	20141028	dose	9	NA	carmustine	250	DMSO	5	H	9	DL238	median.EXT	469
1222	20141028	dose	9	NA	carmustine	250	DMSO	5	H	9	DL238	median.norm.EXT	2.66964285714286
1223	20141028	dose	9	NA	carmustine	250	DMSO	5	H	9	DL238	median.TOF	144
1224	20141028	dose	9	NA	carmustine	250	DMSO	5	H	9	DL238	norm.n	9.66666666666667
1225	20141028	dose	9	NA	carmustine	500	DMSO	5	H	10	DL238	median.EXT	280
1226	20141028	dose	9	NA	carmustine	500	DMSO	5	H	10	DL238	median.norm.EXT	2.92727272727273
1227	20141028	dose	9	NA	carmustine	500	DMSO	5	H	10	DL238	median.TOF	103
1228	20141028	dose	9	NA	carmustine	500	DMSO	5	H	10	DL238	norm.n	8.33333333333333
1229	20141028	dose	9	NA	carmustine	1000	DMSO	5	H	11	DL238	median.EXT	317
1230	20141028	dose	9	NA	carmustine	1000	DMSO	5	H	11	DL238	median.norm.EXT	3.25757575757576
1231	20141028	dose	9	NA	carmustine	1000	DMSO	5	H	11	DL238	median.TOF	107
1232	20141028	dose	9	NA	carmustine	1000	DMSO	5	H	11	DL238	norm.n	8.33333333333333
1233	20141028	dose	9	NA	etoposide	0	DMSO	9	A	1	N2	median.EXT	495
1234	20141028	dose	9	NA	etoposide	0	DMSO	9	A	1	N2	median.norm.EXT	2.0840450310559
1235	20141028	dose	9	NA	etoposide	0	DMSO	9	A	1	N2	median.TOF	231.5
1236	20141028	dose	9	NA	etoposide	0	DMSO	9	A	1	N2	norm.n	126.666666666667
1237	20141028	dose	9	NA	etoposide	125	DMSO	9	A	2	N2	median.EXT	379
1238	20141028	dose	9	NA	etoposide	125	DMSO	9	A	2	N2	median.norm.EXT	1.87892376681614
1239	20141028	dose	9	NA	etoposide	125	DMSO	9	A	2	N2	median.TOF	201
1240	20141028	dose	9	NA	etoposide	125	DMSO	9	A	2	N2	norm.n	113
1241	20141028	dose	9	NA	etoposide	250	DMSO	9	A	3	N2	median.EXT	505.5
1242	20141028	dose	9	NA	etoposide	250	DMSO	9	A	3	N2	median.norm.EXT	2.07553137651822
1243	20141028	dose	9	NA	etoposide	250	DMSO	9	A	3	N2	median.TOF	236
1244	20141028	dose	9	NA	etoposide	250	DMSO	9	A	3	N2	norm.n	140
1245	20141028	dose	9	NA	etoposide	500	DMSO	9	A	4	N2	median.EXT	248.5
1246	20141028	dose	9	NA	etoposide	500	DMSO	9	A	4	N2	median.norm.EXT	1.67540288969158
1247	20141028	dose	9	NA	etoposide	500	DMSO	9	A	4	N2	median.TOF	141
1248	20141028	dose	9	NA	etoposide	500	DMSO	9	A	4	N2	norm.n	58.6666666666667
1249	20141028	dose	9	NA	etoposide	1000	DMSO	9	A	5	N2	median.EXT	173.5
1250	20141028	dose	9	NA	etoposide	1000	DMSO	9	A	5	N2	median.norm.EXT	2.05108428347865
1251	20141028	dose	9	NA	etoposide	1000	DMSO	9	A	5	N2	median.TOF	87.5
1252	20141028	dose	9	NA	etoposide	1000	DMSO	9	A	5	N2	norm.n	29.3333333333333
1253	20141028	dose	9	NA	etoposide	0	DMSO	9	A	7	CB4856	median.EXT	560.5
1254	20141028	dose	9	NA	etoposide	0	DMSO	9	A	7	CB4856	median.norm.EXT	2.22831387616374
1255	20141028	dose	9	NA	etoposide	0	DMSO	9	A	7	CB4856	median.TOF	281
1256	20141028	dose	9	NA	etoposide	0	DMSO	9	A	7	CB4856	norm.n	99.3333333333333
1257	20141028	dose	9	NA	etoposide	125	DMSO	9	A	8	CB4856	median.EXT	389.5
1258	20141028	dose	9	NA	etoposide	125	DMSO	9	A	8	CB4856	median.norm.EXT	1.91421568627451
1259	20141028	dose	9	NA	etoposide	125	DMSO	9	A	8	CB4856	median.TOF	201.5
1260	20141028	dose	9	NA	etoposide	125	DMSO	9	A	8	CB4856	norm.n	112.666666666667
1261	20141028	dose	9	NA	etoposide	250	DMSO	9	A	9	CB4856	median.EXT	296
1262	20141028	dose	9	NA	etoposide	250	DMSO	9	A	9	CB4856	median.norm.EXT	1.86486486486486
1263	20141028	dose	9	NA	etoposide	250	DMSO	9	A	9	CB4856	median.TOF	165
1264	20141028	dose	9	NA	etoposide	250	DMSO	9	A	9	CB4856	norm.n	40.3333333333333
1265	20141028	dose	9	NA	etoposide	500	DMSO	9	A	10	CB4856	median.EXT	346
1266	20141028	dose	9	NA	etoposide	500	DMSO	9	A	10	CB4856	median.norm.EXT	2.39767441860465
1267	20141028	dose	9	NA	etoposide	500	DMSO	9	A	10	CB4856	median.TOF	104
1268	20141028	dose	9	NA	etoposide	500	DMSO	9	A	10	CB4856	norm.n	12.3333333333333
1269	20141028	dose	9	NA	etoposide	1000	DMSO	9	A	11	CB4856	median.EXT	177
1270	20141028	dose	9	NA	etoposide	1000	DMSO	9	A	11	CB4856	median.norm.EXT	2.07264007486256
1271	20141028	dose	9	NA	etoposide	1000	DMSO	9	A	11	CB4856	median.TOF	83
1272	20141028	dose	9	NA	etoposide	1000	DMSO	9	A	11	CB4856	norm.n	5.33333333333333
1273	20141028	dose	9	NA	etoposide	0	DMSO	9	B	1	DL238	median.EXT	661
1274	20141028	dose	9	NA	etoposide	0	DMSO	9	B	1	DL238	median.norm.EXT	2.16863905325444
1275	20141028	dose	9	NA	etoposide	0	DMSO	9	B	1	DL238	median.TOF	305
1276	20141028	dose	9	NA	etoposide	0	DMSO	9	B	1	DL238	norm.n	53.6666666666667
1277	20141028	dose	9	NA	etoposide	125	DMSO	9	B	2	DL238	median.EXT	560.5
1278	20141028	dose	9	NA	etoposide	125	DMSO	9	B	2	DL238	median.norm.EXT	2.12757919209532
1279	20141028	dose	9	NA	etoposide	125	DMSO	9	B	2	DL238	median.TOF	273.5
1280	20141028	dose	9	NA	etoposide	125	DMSO	9	B	2	DL238	norm.n	112
1281	20141028	dose	9	NA	etoposide	250	DMSO	9	B	3	DL238	median.EXT	564
1282	20141028	dose	9	NA	etoposide	250	DMSO	9	B	3	DL238	median.norm.EXT	2.03191529494612
1283	20141028	dose	9	NA	etoposide	250	DMSO	9	B	3	DL238	median.TOF	275.5
1284	20141028	dose	9	NA	etoposide	250	DMSO	9	B	3	DL238	norm.n	102
1285	20141028	dose	9	NA	etoposide	500	DMSO	9	B	4	DL238	median.EXT	248
1286	20141028	dose	9	NA	etoposide	500	DMSO	9	B	4	DL238	median.norm.EXT	1.72521841794569
1287	20141028	dose	9	NA	etoposide	500	DMSO	9	B	4	DL238	median.TOF	133
1288	20141028	dose	9	NA	etoposide	500	DMSO	9	B	4	DL238	norm.n	29.3333333333333
1289	20141028	dose	9	NA	etoposide	1000	DMSO	9	B	5	DL238	median.EXT	271
1290	20141028	dose	9	NA	etoposide	1000	DMSO	9	B	5	DL238	median.norm.EXT	2.72077922077922
1291	20141028	dose	9	NA	etoposide	1000	DMSO	9	B	5	DL238	median.TOF	100.5
1292	20141028	dose	9	NA	etoposide	1000	DMSO	9	B	5	DL238	norm.n	16.6666666666667
1293	20141028	dose	9	NA	etoposide	0	DMSO	9	B	7	JU258	median.EXT	617
1294	20141028	dose	9	NA	etoposide	0	DMSO	9	B	7	JU258	median.norm.EXT	2.42391304347826
1295	20141028	dose	9	NA	etoposide	0	DMSO	9	B	7	JU258	median.TOF	275
1296	20141028	dose	9	NA	etoposide	0	DMSO	9	B	7	JU258	norm.n	108.333333333333
1297	20141028	dose	9	NA	etoposide	125	DMSO	9	B	8	JU258	median.EXT	569.5
1298	20141028	dose	9	NA	etoposide	125	DMSO	9	B	8	JU258	median.norm.EXT	2.3662103936454
1299	20141028	dose	9	NA	etoposide	125	DMSO	9	B	8	JU258	median.TOF	262.5
1300	20141028	dose	9	NA	etoposide	125	DMSO	9	B	8	JU258	norm.n	101.333333333333
1301	20141028	dose	9	NA	etoposide	250	DMSO	9	B	9	JU258	median.EXT	442
1302	20141028	dose	9	NA	etoposide	250	DMSO	9	B	9	JU258	median.norm.EXT	2.18787552969452
1303	20141028	dose	9	NA	etoposide	250	DMSO	9	B	9	JU258	median.TOF	216.5
1304	20141028	dose	9	NA	etoposide	250	DMSO	9	B	9	JU258	norm.n	68
1305	20141028	dose	9	NA	etoposide	500	DMSO	9	B	10	JU258	median.EXT	207.5
1306	20141028	dose	9	NA	etoposide	500	DMSO	9	B	10	JU258	median.norm.EXT	2.03317448680352
1307	20141028	dose	9	NA	etoposide	500	DMSO	9	B	10	JU258	median.TOF	116.5
1308	20141028	dose	9	NA	etoposide	500	DMSO	9	B	10	JU258	norm.n	22
1309	20141028	dose	9	NA	etoposide	1000	DMSO	9	B	11	JU258	median.EXT	214
1310	20141028	dose	9	NA	etoposide	1000	DMSO	9	B	11	JU258	median.norm.EXT	2.37476053639847
1311	20141028	dose	9	NA	etoposide	1000	DMSO	9	B	11	JU258	median.TOF	95
1312	20141028	dose	9	NA	etoposide	1000	DMSO	9	B	11	JU258	norm.n	12.6666666666667
1313	20141028	dose	9	NA	etoposide	0	DMSO	9	C	1	DL238	median.EXT	537
1314	20141028	dose	9	NA	etoposide	0	DMSO	9	C	1	DL238	median.norm.EXT	2.00696864111498
1315	20141028	dose	9	NA	etoposide	0	DMSO	9	C	1	DL238	median.TOF	266
1316	20141028	dose	9	NA	etoposide	0	DMSO	9	C	1	DL238	norm.n	117.666666666667
1317	20141028	dose	9	NA	etoposide	125	DMSO	9	C	2	DL238	median.EXT	548
1318	20141028	dose	9	NA	etoposide	125	DMSO	9	C	2	DL238	median.norm.EXT	2.01346801346801
1319	20141028	dose	9	NA	etoposide	125	DMSO	9	C	2	DL238	median.TOF	283
1320	20141028	dose	9	NA	etoposide	125	DMSO	9	C	2	DL238	norm.n	105.666666666667
1321	20141028	dose	9	NA	etoposide	250	DMSO	9	C	3	DL238	median.EXT	541
1322	20141028	dose	9	NA	etoposide	250	DMSO	9	C	3	DL238	median.norm.EXT	2.00803157556565
1323	20141028	dose	9	NA	etoposide	250	DMSO	9	C	3	DL238	median.TOF	267
1324	20141028	dose	9	NA	etoposide	250	DMSO	9	C	3	DL238	norm.n	98.6666666666667
1325	20141028	dose	9	NA	etoposide	500	DMSO	9	C	4	DL238	median.EXT	216
1326	20141028	dose	9	NA	etoposide	500	DMSO	9	C	4	DL238	median.norm.EXT	1.9047619047619
1327	20141028	dose	9	NA	etoposide	500	DMSO	9	C	4	DL238	median.TOF	115
1328	20141028	dose	9	NA	etoposide	500	DMSO	9	C	4	DL238	norm.n	21
1329	20141028	dose	9	NA	etoposide	1000	DMSO	9	C	5	DL238	median.EXT	207.5
1330	20141028	dose	9	NA	etoposide	1000	DMSO	9	C	5	DL238	median.norm.EXT	2.23783783783784
1331	20141028	dose	9	NA	etoposide	1000	DMSO	9	C	5	DL238	median.TOF	85
1332	20141028	dose	9	NA	etoposide	1000	DMSO	9	C	5	DL238	norm.n	15.3333333333333
1333	20141028	dose	9	NA	etoposide	0	DMSO	9	C	7	N2	median.EXT	511.5
1334	20141028	dose	9	NA	etoposide	0	DMSO	9	C	7	N2	median.norm.EXT	1.96907650633949
1335	20141028	dose	9	NA	etoposide	0	DMSO	9	C	7	N2	median.TOF	260.5
1336	20141028	dose	9	NA	etoposide	0	DMSO	9	C	7	N2	norm.n	178
1337	20141028	dose	9	NA	etoposide	125	DMSO	9	C	8	N2	median.EXT	503
1338	20141028	dose	9	NA	etoposide	125	DMSO	9	C	8	N2	median.norm.EXT	1.98181818181818
1339	20141028	dose	9	NA	etoposide	125	DMSO	9	C	8	N2	median.TOF	258
1340	20141028	dose	9	NA	etoposide	125	DMSO	9	C	8	N2	norm.n	151
1341	20141028	dose	9	NA	etoposide	250	DMSO	9	C	9	N2	median.EXT	496
1342	20141028	dose	9	NA	etoposide	250	DMSO	9	C	9	N2	median.norm.EXT	1.91582885736584
1343	20141028	dose	9	NA	etoposide	250	DMSO	9	C	9	N2	median.TOF	241
1344	20141028	dose	9	NA	etoposide	250	DMSO	9	C	9	N2	norm.n	110.666666666667
1345	20141028	dose	9	NA	etoposide	500	DMSO	9	C	10	N2	median.EXT	309
1346	20141028	dose	9	NA	etoposide	500	DMSO	9	C	10	N2	median.norm.EXT	1.74725274725275
1347	20141028	dose	9	NA	etoposide	500	DMSO	9	C	10	N2	median.TOF	184
1348	20141028	dose	9	NA	etoposide	500	DMSO	9	C	10	N2	norm.n	23.6666666666667
1349	20141028	dose	9	NA	etoposide	1000	DMSO	9	C	11	N2	median.EXT	177
1350	20141028	dose	9	NA	etoposide	1000	DMSO	9	C	11	N2	median.norm.EXT	1.67142857142857
1351	20141028	dose	9	NA	etoposide	1000	DMSO	9	C	11	N2	median.TOF	85
1352	20141028	dose	9	NA	etoposide	1000	DMSO	9	C	11	N2	norm.n	25.6666666666667
1353	20141028	dose	9	NA	etoposide	0	DMSO	9	D	1	JU258	median.EXT	842
1354	20141028	dose	9	NA	etoposide	0	DMSO	9	D	1	JU258	median.norm.EXT	2.63443396226415
1355	20141028	dose	9	NA	etoposide	0	DMSO	9	D	1	JU258	median.TOF	303
1356	20141028	dose	9	NA	etoposide	0	DMSO	9	D	1	JU258	norm.n	87.6666666666667
1357	20141028	dose	9	NA	etoposide	125	DMSO	9	D	2	JU258	median.EXT	787.5
1358	20141028	dose	9	NA	etoposide	125	DMSO	9	D	2	JU258	median.norm.EXT	2.68723911747168
1359	20141028	dose	9	NA	etoposide	125	DMSO	9	D	2	JU258	median.TOF	295
1360	20141028	dose	9	NA	etoposide	125	DMSO	9	D	2	JU258	norm.n	86.6666666666667
1361	20141028	dose	9	NA	etoposide	500	DMSO	9	D	4	JU258	median.EXT	350
1362	20141028	dose	9	NA	etoposide	500	DMSO	9	D	4	JU258	median.norm.EXT	1.98046875
1363	20141028	dose	9	NA	etoposide	500	DMSO	9	D	4	JU258	median.TOF	157
1364	20141028	dose	9	NA	etoposide	500	DMSO	9	D	4	JU258	norm.n	35.6666666666667
1365	20141028	dose	9	NA	etoposide	1000	DMSO	9	D	5	JU258	median.EXT	257
1366	20141028	dose	9	NA	etoposide	1000	DMSO	9	D	5	JU258	median.norm.EXT	2.05583756345178
1367	20141028	dose	9	NA	etoposide	1000	DMSO	9	D	5	JU258	median.TOF	111
1368	20141028	dose	9	NA	etoposide	1000	DMSO	9	D	5	JU258	norm.n	11
1369	20141028	dose	9	NA	etoposide	0	DMSO	9	D	7	CB4856	median.EXT	581
1370	20141028	dose	9	NA	etoposide	0	DMSO	9	D	7	CB4856	median.norm.EXT	2.14160739687055
1371	20141028	dose	9	NA	etoposide	0	DMSO	9	D	7	CB4856	median.TOF	278
1372	20141028	dose	9	NA	etoposide	0	DMSO	9	D	7	CB4856	norm.n	92
1373	20141028	dose	9	NA	etoposide	125	DMSO	9	D	8	CB4856	median.EXT	443
1374	20141028	dose	9	NA	etoposide	125	DMSO	9	D	8	CB4856	median.norm.EXT	1.80754985754986
1375	20141028	dose	9	NA	etoposide	125	DMSO	9	D	8	CB4856	median.TOF	230
1376	20141028	dose	9	NA	etoposide	125	DMSO	9	D	8	CB4856	norm.n	161.333333333333
1377	20141028	dose	9	NA	etoposide	250	DMSO	9	D	9	CB4856	median.EXT	268.5
1378	20141028	dose	9	NA	etoposide	250	DMSO	9	D	9	CB4856	median.norm.EXT	1.76536294109754
1379	20141028	dose	9	NA	etoposide	250	DMSO	9	D	9	CB4856	median.TOF	155
1380	20141028	dose	9	NA	etoposide	250	DMSO	9	D	9	CB4856	norm.n	46
1381	20141028	dose	9	NA	etoposide	500	DMSO	9	D	10	CB4856	median.EXT	167
1382	20141028	dose	9	NA	etoposide	500	DMSO	9	D	10	CB4856	median.norm.EXT	1.57538659793814
1383	20141028	dose	9	NA	etoposide	500	DMSO	9	D	10	CB4856	median.TOF	100.5
1384	20141028	dose	9	NA	etoposide	500	DMSO	9	D	10	CB4856	norm.n	19.3333333333333
1385	20141028	dose	9	NA	etoposide	1000	DMSO	9	D	11	CB4856	median.EXT	245
1386	20141028	dose	9	NA	etoposide	1000	DMSO	9	D	11	CB4856	median.norm.EXT	2.30831643002028
1387	20141028	dose	9	NA	etoposide	1000	DMSO	9	D	11	CB4856	median.TOF	102.5
1388	20141028	dose	9	NA	etoposide	1000	DMSO	9	D	11	CB4856	norm.n	22
1389	20141028	dose	9	NA	etoposide	0	DMSO	9	E	1	JU258	median.EXT	626
1390	20141028	dose	9	NA	etoposide	0	DMSO	9	E	1	JU258	median.norm.EXT	2.10979502688172
1391	20141028	dose	9	NA	etoposide	0	DMSO	9	E	1	JU258	median.TOF	290
1392	20141028	dose	9	NA	etoposide	0	DMSO	9	E	1	JU258	norm.n	110
1393	20141028	dose	9	NA	etoposide	125	DMSO	9	E	2	JU258	median.EXT	517
1394	20141028	dose	9	NA	etoposide	125	DMSO	9	E	2	JU258	median.norm.EXT	1.97849039281264
1395	20141028	dose	9	NA	etoposide	125	DMSO	9	E	2	JU258	median.TOF	250
1396	20141028	dose	9	NA	etoposide	125	DMSO	9	E	2	JU258	norm.n	116.666666666667
1397	20141028	dose	9	NA	etoposide	250	DMSO	9	E	3	JU258	median.EXT	513.5
1398	20141028	dose	9	NA	etoposide	250	DMSO	9	E	3	JU258	median.norm.EXT	2.12967759393846
1399	20141028	dose	9	NA	etoposide	250	DMSO	9	E	3	JU258	median.TOF	241.5
1400	20141028	dose	9	NA	etoposide	250	DMSO	9	E	3	JU258	norm.n	92
1401	20141028	dose	9	NA	etoposide	500	DMSO	9	E	4	JU258	median.EXT	302
1402	20141028	dose	9	NA	etoposide	500	DMSO	9	E	4	JU258	median.norm.EXT	1.82692307692308
1403	20141028	dose	9	NA	etoposide	500	DMSO	9	E	4	JU258	median.TOF	151
1404	20141028	dose	9	NA	etoposide	500	DMSO	9	E	4	JU258	norm.n	52.3333333333333
1405	20141028	dose	9	NA	etoposide	1000	DMSO	9	E	5	JU258	median.EXT	168
1406	20141028	dose	9	NA	etoposide	1000	DMSO	9	E	5	JU258	median.norm.EXT	1.78125
1407	20141028	dose	9	NA	etoposide	1000	DMSO	9	E	5	JU258	median.TOF	102
1408	20141028	dose	9	NA	etoposide	1000	DMSO	9	E	5	JU258	norm.n	7.66666666666667
1409	20141028	dose	9	NA	etoposide	0	DMSO	9	E	7	DL238	median.EXT	528
1410	20141028	dose	9	NA	etoposide	0	DMSO	9	E	7	DL238	median.norm.EXT	1.9
1411	20141028	dose	9	NA	etoposide	0	DMSO	9	E	7	DL238	median.TOF	273
1412	20141028	dose	9	NA	etoposide	0	DMSO	9	E	7	DL238	norm.n	113.666666666667
1413	20141028	dose	9	NA	etoposide	125	DMSO	9	E	8	DL238	median.EXT	567
1414	20141028	dose	9	NA	etoposide	125	DMSO	9	E	8	DL238	median.norm.EXT	1.98168498168498
1415	20141028	dose	9	NA	etoposide	125	DMSO	9	E	8	DL238	median.TOF	274
1416	20141028	dose	9	NA	etoposide	125	DMSO	9	E	8	DL238	norm.n	86.3333333333333
1417	20141028	dose	9	NA	etoposide	250	DMSO	9	E	9	DL238	median.EXT	376
1418	20141028	dose	9	NA	etoposide	250	DMSO	9	E	9	DL238	median.norm.EXT	1.81642512077295
1419	20141028	dose	9	NA	etoposide	250	DMSO	9	E	9	DL238	median.TOF	212
1420	20141028	dose	9	NA	etoposide	250	DMSO	9	E	9	DL238	norm.n	91
1421	20141028	dose	9	NA	etoposide	500	DMSO	9	E	10	DL238	median.EXT	226
1422	20141028	dose	9	NA	etoposide	500	DMSO	9	E	10	DL238	median.norm.EXT	1.91428571428571
1423	20141028	dose	9	NA	etoposide	500	DMSO	9	E	10	DL238	median.TOF	114
1424	20141028	dose	9	NA	etoposide	500	DMSO	9	E	10	DL238	norm.n	16.3333333333333
1425	20141028	dose	9	NA	etoposide	1000	DMSO	9	E	11	DL238	median.EXT	188
1426	20141028	dose	9	NA	etoposide	1000	DMSO	9	E	11	DL238	median.norm.EXT	1.98591549295775
1427	20141028	dose	9	NA	etoposide	1000	DMSO	9	E	11	DL238	median.TOF	88
1428	20141028	dose	9	NA	etoposide	1000	DMSO	9	E	11	DL238	norm.n	15
1429	20141028	dose	9	NA	etoposide	0	DMSO	9	F	1	CB4856	median.EXT	536
1430	20141028	dose	9	NA	etoposide	0	DMSO	9	F	1	CB4856	median.norm.EXT	1.91034078807242
1431	20141028	dose	9	NA	etoposide	0	DMSO	9	F	1	CB4856	median.TOF	291.5
1432	20141028	dose	9	NA	etoposide	0	DMSO	9	F	1	CB4856	norm.n	120
1433	20141028	dose	9	NA	etoposide	125	DMSO	9	F	2	CB4856	median.EXT	524.5
1434	20141028	dose	9	NA	etoposide	125	DMSO	9	F	2	CB4856	median.norm.EXT	1.97739334558073
1435	20141028	dose	9	NA	etoposide	125	DMSO	9	F	2	CB4856	median.TOF	256
1436	20141028	dose	9	NA	etoposide	125	DMSO	9	F	2	CB4856	norm.n	101.333333333333
1437	20141028	dose	9	NA	etoposide	250	DMSO	9	F	3	CB4856	median.EXT	205
1438	20141028	dose	9	NA	etoposide	250	DMSO	9	F	3	CB4856	median.norm.EXT	1.640625
1439	20141028	dose	9	NA	etoposide	250	DMSO	9	F	3	CB4856	median.TOF	116
1440	20141028	dose	9	NA	etoposide	250	DMSO	9	F	3	CB4856	norm.n	35
1441	20141028	dose	9	NA	etoposide	500	DMSO	9	F	4	CB4856	median.EXT	169
1442	20141028	dose	9	NA	etoposide	500	DMSO	9	F	4	CB4856	median.norm.EXT	1.82432432432432
1443	20141028	dose	9	NA	etoposide	500	DMSO	9	F	4	CB4856	median.TOF	83
1444	20141028	dose	9	NA	etoposide	500	DMSO	9	F	4	CB4856	norm.n	11
1445	20141028	dose	9	NA	etoposide	1000	DMSO	9	F	5	CB4856	median.EXT	184
1446	20141028	dose	9	NA	etoposide	1000	DMSO	9	F	5	CB4856	median.norm.EXT	2.66666666666667
1447	20141028	dose	9	NA	etoposide	1000	DMSO	9	F	5	CB4856	median.TOF	88
1448	20141028	dose	9	NA	etoposide	1000	DMSO	9	F	5	CB4856	norm.n	6.33333333333333
1449	20141028	dose	9	NA	etoposide	0	DMSO	9	F	7	N2	median.EXT	514
1450	20141028	dose	9	NA	etoposide	0	DMSO	9	F	7	N2	median.norm.EXT	1.94756554307116
1451	20141028	dose	9	NA	etoposide	0	DMSO	9	F	7	N2	median.TOF	268
1452	20141028	dose	9	NA	etoposide	0	DMSO	9	F	7	N2	norm.n	159.666666666667
1453	20141028	dose	9	NA	etoposide	125	DMSO	9	F	8	N2	median.EXT	700
1454	20141028	dose	9	NA	etoposide	125	DMSO	9	F	8	N2	median.norm.EXT	2.33177570093458
1455	20141028	dose	9	NA	etoposide	125	DMSO	9	F	8	N2	median.TOF	302
1456	20141028	dose	9	NA	etoposide	125	DMSO	9	F	8	N2	norm.n	99
1457	20141028	dose	9	NA	etoposide	250	DMSO	9	F	9	N2	median.EXT	376
1458	20141028	dose	9	NA	etoposide	250	DMSO	9	F	9	N2	median.norm.EXT	1.83870967741935
1459	20141028	dose	9	NA	etoposide	250	DMSO	9	F	9	N2	median.TOF	215
1460	20141028	dose	9	NA	etoposide	250	DMSO	9	F	9	N2	norm.n	89
1461	20141028	dose	9	NA	etoposide	500	DMSO	9	F	10	N2	median.EXT	241.5
1462	20141028	dose	9	NA	etoposide	500	DMSO	9	F	10	N2	median.norm.EXT	1.91511627906977
1463	20141028	dose	9	NA	etoposide	500	DMSO	9	F	10	N2	median.TOF	111.5
1464	20141028	dose	9	NA	etoposide	500	DMSO	9	F	10	N2	norm.n	21.3333333333333
1465	20141028	dose	9	NA	etoposide	1000	DMSO	9	F	11	N2	median.EXT	221
1466	20141028	dose	9	NA	etoposide	1000	DMSO	9	F	11	N2	median.norm.EXT	2.46478873239437
1467	20141028	dose	9	NA	etoposide	1000	DMSO	9	F	11	N2	median.TOF	94
1468	20141028	dose	9	NA	etoposide	1000	DMSO	9	F	11	N2	norm.n	21.6666666666667
1469	20141028	dose	9	NA	etoposide	0	DMSO	9	G	1	CB4856	median.EXT	575.5
1470	20141028	dose	9	NA	etoposide	0	DMSO	9	G	1	CB4856	median.norm.EXT	1.9331369213107
1471	20141028	dose	9	NA	etoposide	0	DMSO	9	G	1	CB4856	median.TOF	301
1472	20141028	dose	9	NA	etoposide	0	DMSO	9	G	1	CB4856	norm.n	139.333333333333
1473	20141028	dose	9	NA	etoposide	125	DMSO	9	G	2	CB4856	median.EXT	530
1474	20141028	dose	9	NA	etoposide	125	DMSO	9	G	2	CB4856	median.norm.EXT	1.92255892255892
1475	20141028	dose	9	NA	etoposide	125	DMSO	9	G	2	CB4856	median.TOF	276
1476	20141028	dose	9	NA	etoposide	125	DMSO	9	G	2	CB4856	norm.n	107.666666666667
1477	20141028	dose	9	NA	etoposide	250	DMSO	9	G	3	CB4856	median.EXT	261.5
1478	20141028	dose	9	NA	etoposide	250	DMSO	9	G	3	CB4856	median.norm.EXT	1.58145854398382
1479	20141028	dose	9	NA	etoposide	250	DMSO	9	G	3	CB4856	median.TOF	156.5
1480	20141028	dose	9	NA	etoposide	250	DMSO	9	G	3	CB4856	norm.n	36.6666666666667
1481	20141028	dose	9	NA	etoposide	500	DMSO	9	G	4	CB4856	median.EXT	227.5
1482	20141028	dose	9	NA	etoposide	500	DMSO	9	G	4	CB4856	median.norm.EXT	2.19191919191919
1483	20141028	dose	9	NA	etoposide	500	DMSO	9	G	4	CB4856	median.TOF	96.5
1484	20141028	dose	9	NA	etoposide	500	DMSO	9	G	4	CB4856	norm.n	18
1485	20141028	dose	9	NA	etoposide	1000	DMSO	9	G	5	CB4856	median.EXT	183
1486	20141028	dose	9	NA	etoposide	1000	DMSO	9	G	5	CB4856	median.norm.EXT	1.90322580645161
1487	20141028	dose	9	NA	etoposide	1000	DMSO	9	G	5	CB4856	median.TOF	88
1488	20141028	dose	9	NA	etoposide	1000	DMSO	9	G	5	CB4856	norm.n	7
1489	20141028	dose	9	NA	etoposide	0	DMSO	9	G	7	JU258	median.EXT	697.5
1490	20141028	dose	9	NA	etoposide	0	DMSO	9	G	7	JU258	median.norm.EXT	2.32478853383459
1491	20141028	dose	9	NA	etoposide	0	DMSO	9	G	7	JU258	median.TOF	303
1492	20141028	dose	9	NA	etoposide	0	DMSO	9	G	7	JU258	norm.n	81.3333333333333
1493	20141028	dose	9	NA	etoposide	125	DMSO	9	G	8	JU258	median.EXT	552
1494	20141028	dose	9	NA	etoposide	125	DMSO	9	G	8	JU258	median.norm.EXT	2.08333333333333
1495	20141028	dose	9	NA	etoposide	125	DMSO	9	G	8	JU258	median.TOF	271
1496	20141028	dose	9	NA	etoposide	125	DMSO	9	G	8	JU258	norm.n	107.666666666667
1497	20141028	dose	9	NA	etoposide	250	DMSO	9	G	9	JU258	median.EXT	565
1498	20141028	dose	9	NA	etoposide	250	DMSO	9	G	9	JU258	median.norm.EXT	2.16989389920424
1499	20141028	dose	9	NA	etoposide	250	DMSO	9	G	9	JU258	median.TOF	251
1500	20141028	dose	9	NA	etoposide	250	DMSO	9	G	9	JU258	norm.n	72
1501	20141028	dose	9	NA	etoposide	500	DMSO	9	G	10	JU258	median.EXT	317
1502	20141028	dose	9	NA	etoposide	500	DMSO	9	G	10	JU258	median.norm.EXT	1.77651328740157
1503	20141028	dose	9	NA	etoposide	500	DMSO	9	G	10	JU258	median.TOF	158.5
1504	20141028	dose	9	NA	etoposide	500	DMSO	9	G	10	JU258	norm.n	34.6666666666667
1505	20141028	dose	9	NA	etoposide	1000	DMSO	9	G	11	JU258	median.EXT	213
1506	20141028	dose	9	NA	etoposide	1000	DMSO	9	G	11	JU258	median.norm.EXT	2.11712016224438
1507	20141028	dose	9	NA	etoposide	1000	DMSO	9	G	11	JU258	median.TOF	96.5
1508	20141028	dose	9	NA	etoposide	1000	DMSO	9	G	11	JU258	norm.n	22
1509	20141028	dose	9	NA	etoposide	0	DMSO	9	H	1	N2	median.EXT	556
1510	20141028	dose	9	NA	etoposide	0	DMSO	9	H	1	N2	median.norm.EXT	2.00621118012422
1511	20141028	dose	9	NA	etoposide	0	DMSO	9	H	1	N2	median.TOF	286
1512	20141028	dose	9	NA	etoposide	0	DMSO	9	H	1	N2	norm.n	81.6666666666667
1513	20141028	dose	9	NA	etoposide	125	DMSO	9	H	2	N2	median.EXT	551.5
1514	20141028	dose	9	NA	etoposide	125	DMSO	9	H	2	N2	median.norm.EXT	1.88265818547037
1515	20141028	dose	9	NA	etoposide	125	DMSO	9	H	2	N2	median.TOF	291.5
1516	20141028	dose	9	NA	etoposide	125	DMSO	9	H	2	N2	norm.n	138
1517	20141028	dose	9	NA	etoposide	250	DMSO	9	H	3	N2	median.EXT	444
1518	20141028	dose	9	NA	etoposide	250	DMSO	9	H	3	N2	median.norm.EXT	1.84848484848485
1519	20141028	dose	9	NA	etoposide	250	DMSO	9	H	3	N2	median.TOF	245
1520	20141028	dose	9	NA	etoposide	250	DMSO	9	H	3	N2	norm.n	74.3333333333333
1521	20141028	dose	9	NA	etoposide	500	DMSO	9	H	4	N2	median.EXT	257
1522	20141028	dose	9	NA	etoposide	500	DMSO	9	H	4	N2	median.norm.EXT	1.6283185840708
1523	20141028	dose	9	NA	etoposide	500	DMSO	9	H	4	N2	median.TOF	158
1524	20141028	dose	9	NA	etoposide	500	DMSO	9	H	4	N2	norm.n	40.3333333333333
1525	20141028	dose	9	NA	etoposide	1000	DMSO	9	H	5	N2	median.EXT	199
1526	20141028	dose	9	NA	etoposide	1000	DMSO	9	H	5	N2	median.norm.EXT	2.18292682926829
1527	20141028	dose	9	NA	etoposide	1000	DMSO	9	H	5	N2	median.TOF	100
1528	20141028	dose	9	NA	etoposide	1000	DMSO	9	H	5	N2	norm.n	34.3333333333333
1529	20141028	dose	9	NA	etoposide	0	DMSO	9	H	7	DL238	median.EXT	522.5
1530	20141028	dose	9	NA	etoposide	0	DMSO	9	H	7	DL238	median.norm.EXT	1.79623477297896
1531	20141028	dose	9	NA	etoposide	0	DMSO	9	H	7	DL238	median.TOF	284.5
1532	20141028	dose	9	NA	etoposide	0	DMSO	9	H	7	DL238	norm.n	148
1533	20141028	dose	9	NA	etoposide	125	DMSO	9	H	8	DL238	median.EXT	578
1534	20141028	dose	9	NA	etoposide	125	DMSO	9	H	8	DL238	median.norm.EXT	2.01594645445853
1535	20141028	dose	9	NA	etoposide	125	DMSO	9	H	8	DL238	median.TOF	296.5
1536	20141028	dose	9	NA	etoposide	125	DMSO	9	H	8	DL238	norm.n	84
1537	20141028	dose	9	NA	etoposide	250	DMSO	9	H	9	DL238	median.EXT	510
1538	20141028	dose	9	NA	etoposide	250	DMSO	9	H	9	DL238	median.norm.EXT	1.89765277777778
1539	20141028	dose	9	NA	etoposide	250	DMSO	9	H	9	DL238	median.TOF	278
1540	20141028	dose	9	NA	etoposide	250	DMSO	9	H	9	DL238	norm.n	93.3333333333333
1541	20141028	dose	9	NA	etoposide	500	DMSO	9	H	10	DL238	median.EXT	233
1542	20141028	dose	9	NA	etoposide	500	DMSO	9	H	10	DL238	median.norm.EXT	1.52777777777778
1543	20141028	dose	9	NA	etoposide	500	DMSO	9	H	10	DL238	median.TOF	144
1544	20141028	dose	9	NA	etoposide	500	DMSO	9	H	10	DL238	norm.n	36.3333333333333
1545	20141028	dose	9	NA	etoposide	1000	DMSO	9	H	11	DL238	median.EXT	186.5
1546	20141028	dose	9	NA	etoposide	1000	DMSO	9	H	11	DL238	median.norm.EXT	2.12483266398929
1547	20141028	dose	9	NA	etoposide	1000	DMSO	9	H	11	DL238	median.TOF	84.5
1548	20141028	dose	9	NA	etoposide	1000	DMSO	9	H	11	DL238	norm.n	23.3333333333333
1549	20141028	dose	9	NA	bleomycin	0	water	19	A	1	N2	median.EXT	450
1550	20141028	dose	9	NA	bleomycin	0	water	19	A	1	N2	median.norm.EXT	2.09002655447115
1551	20141028	dose	9	NA	bleomycin	0	water	19	A	1	N2	median.TOF	206.5
1552	20141028	dose	9	NA	bleomycin	0	water	19	A	1	N2	norm.n	144.666666666667
1553	20141028	dose	9	NA	bleomycin	25	water	19	A	2	N2	median.EXT	547
1554	20141028	dose	9	NA	bleomycin	25	water	19	A	2	N2	median.norm.EXT	2.35744680851064
1555	20141028	dose	9	NA	bleomycin	25	water	19	A	2	N2	median.TOF	251
1556	20141028	dose	9	NA	bleomycin	25	water	19	A	2	N2	norm.n	125
1557	20141028	dose	9	NA	bleomycin	50	water	19	A	3	N2	median.EXT	169
1558	20141028	dose	9	NA	bleomycin	50	water	19	A	3	N2	median.norm.EXT	1.39080459770115
1559	20141028	dose	9	NA	bleomycin	50	water	19	A	3	N2	median.TOF	119
1560	20141028	dose	9	NA	bleomycin	50	water	19	A	3	N2	norm.n	83
1561	20141028	dose	9	NA	bleomycin	75	water	19	A	4	N2	median.EXT	129.5
1562	20141028	dose	9	NA	bleomycin	75	water	19	A	4	N2	median.norm.EXT	1.23889734366353
1563	20141028	dose	9	NA	bleomycin	75	water	19	A	4	N2	median.TOF	99
1564	20141028	dose	9	NA	bleomycin	75	water	19	A	4	N2	norm.n	88.6666666666667
1565	20141028	dose	9	NA	bleomycin	100	water	19	A	5	N2	median.EXT	112
1566	20141028	dose	9	NA	bleomycin	100	water	19	A	5	N2	median.norm.EXT	1.23664122137405
1567	20141028	dose	9	NA	bleomycin	100	water	19	A	5	N2	median.TOF	86
1568	20141028	dose	9	NA	bleomycin	100	water	19	A	5	N2	norm.n	28.3333333333333
1569	20141028	dose	9	NA	bleomycin	0	water	19	A	7	CB4856	median.EXT	600
1570	20141028	dose	9	NA	bleomycin	0	water	19	A	7	CB4856	median.norm.EXT	2.18987341772152
1571	20141028	dose	9	NA	bleomycin	0	water	19	A	7	CB4856	median.TOF	287
1572	20141028	dose	9	NA	bleomycin	0	water	19	A	7	CB4856	norm.n	91.6666666666667
1573	20141028	dose	9	NA	bleomycin	25	water	19	A	8	CB4856	median.EXT	530
1574	20141028	dose	9	NA	bleomycin	25	water	19	A	8	CB4856	median.norm.EXT	2.04575163398693
1575	20141028	dose	9	NA	bleomycin	25	water	19	A	8	CB4856	median.TOF	265
1576	20141028	dose	9	NA	bleomycin	25	water	19	A	8	CB4856	norm.n	129
1577	20141028	dose	9	NA	bleomycin	50	water	19	A	9	CB4856	median.EXT	250
1578	20141028	dose	9	NA	bleomycin	50	water	19	A	9	CB4856	median.norm.EXT	1.48647186147186
1579	20141028	dose	9	NA	bleomycin	50	water	19	A	9	CB4856	median.TOF	160.5
1580	20141028	dose	9	NA	bleomycin	50	water	19	A	9	CB4856	norm.n	130
1581	20141028	dose	9	NA	bleomycin	75	water	19	A	10	CB4856	median.EXT	173
1582	20141028	dose	9	NA	bleomycin	75	water	19	A	10	CB4856	median.norm.EXT	1.26212921065862
1583	20141028	dose	9	NA	bleomycin	75	water	19	A	10	CB4856	median.TOF	130
1584	20141028	dose	9	NA	bleomycin	75	water	19	A	10	CB4856	norm.n	92
1585	20141028	dose	9	NA	bleomycin	100	water	19	A	11	CB4856	median.EXT	145
1586	20141028	dose	9	NA	bleomycin	100	water	19	A	11	CB4856	median.norm.EXT	1.30952380952381
1587	20141028	dose	9	NA	bleomycin	100	water	19	A	11	CB4856	median.TOF	107
1588	20141028	dose	9	NA	bleomycin	100	water	19	A	11	CB4856	norm.n	67.5
1589	20141028	dose	9	NA	bleomycin	0	water	19	B	1	DL238	median.EXT	556
1590	20141028	dose	9	NA	bleomycin	0	water	19	B	1	DL238	median.norm.EXT	2.03651618827572
1591	20141028	dose	9	NA	bleomycin	0	water	19	B	1	DL238	median.TOF	284
1592	20141028	dose	9	NA	bleomycin	0	water	19	B	1	DL238	norm.n	118.666666666667
1593	20141028	dose	9	NA	bleomycin	25	water	19	B	2	DL238	median.EXT	565
1594	20141028	dose	9	NA	bleomycin	25	water	19	B	2	DL238	median.norm.EXT	2.01677435673389
1595	20141028	dose	9	NA	bleomycin	25	water	19	B	2	DL238	median.TOF	291
1596	20141028	dose	9	NA	bleomycin	25	water	19	B	2	DL238	norm.n	138
1597	20141028	dose	9	NA	bleomycin	50	water	19	B	3	DL238	median.EXT	265
1598	20141028	dose	9	NA	bleomycin	50	water	19	B	3	DL238	median.norm.EXT	1.49356223175966
1599	20141028	dose	9	NA	bleomycin	50	water	19	B	3	DL238	median.TOF	175
1600	20141028	dose	9	NA	bleomycin	50	water	19	B	3	DL238	norm.n	93
1601	20141028	dose	9	NA	bleomycin	75	water	19	B	4	DL238	median.EXT	206
1602	20141028	dose	9	NA	bleomycin	75	water	19	B	4	DL238	median.norm.EXT	1.39101641232364
1603	20141028	dose	9	NA	bleomycin	75	water	19	B	4	DL238	median.TOF	143.5
1604	20141028	dose	9	NA	bleomycin	75	water	19	B	4	DL238	norm.n	97.3333333333333
1605	20141028	dose	9	NA	bleomycin	100	water	19	B	5	DL238	median.EXT	162
1606	20141028	dose	9	NA	bleomycin	100	water	19	B	5	DL238	median.norm.EXT	1.2719298245614
1607	20141028	dose	9	NA	bleomycin	100	water	19	B	5	DL238	median.TOF	123
1608	20141028	dose	9	NA	bleomycin	100	water	19	B	5	DL238	norm.n	37
1609	20141028	dose	9	NA	bleomycin	0	water	19	B	7	JU258	median.EXT	625
1610	20141028	dose	9	NA	bleomycin	0	water	19	B	7	JU258	median.norm.EXT	2.4896875
1611	20141028	dose	9	NA	bleomycin	0	water	19	B	7	JU258	median.TOF	277
1612	20141028	dose	9	NA	bleomycin	0	water	19	B	7	JU258	norm.n	92.6666666666667
1613	20141028	dose	9	NA	bleomycin	25	water	19	B	8	JU258	median.EXT	558.5
1614	20141028	dose	9	NA	bleomycin	25	water	19	B	8	JU258	median.norm.EXT	2.56407748485213
1615	20141028	dose	9	NA	bleomycin	25	water	19	B	8	JU258	median.TOF	221.5
1616	20141028	dose	9	NA	bleomycin	25	water	19	B	8	JU258	norm.n	113.333333333333
1617	20141028	dose	9	NA	bleomycin	50	water	19	B	9	JU258	median.EXT	230
1618	20141028	dose	9	NA	bleomycin	50	water	19	B	9	JU258	median.norm.EXT	1.63366336633663
1619	20141028	dose	9	NA	bleomycin	50	water	19	B	9	JU258	median.TOF	128
1620	20141028	dose	9	NA	bleomycin	50	water	19	B	9	JU258	norm.n	89.6666666666667
1621	20141028	dose	9	NA	bleomycin	75	water	19	B	10	JU258	median.EXT	168
1622	20141028	dose	9	NA	bleomycin	75	water	19	B	10	JU258	median.norm.EXT	1.30973451327434
1623	20141028	dose	9	NA	bleomycin	75	water	19	B	10	JU258	median.TOF	125
1624	20141028	dose	9	NA	bleomycin	75	water	19	B	10	JU258	norm.n	55
1625	20141028	dose	9	NA	bleomycin	100	water	19	B	11	JU258	median.EXT	140
1626	20141028	dose	9	NA	bleomycin	100	water	19	B	11	JU258	median.norm.EXT	1.278129395218
1627	20141028	dose	9	NA	bleomycin	100	water	19	B	11	JU258	median.TOF	98.5
1628	20141028	dose	9	NA	bleomycin	100	water	19	B	11	JU258	norm.n	64
1629	20141028	dose	9	NA	bleomycin	0	water	19	C	1	DL238	median.EXT	580
1630	20141028	dose	9	NA	bleomycin	0	water	19	C	1	DL238	median.norm.EXT	1.97284957731654
1631	20141028	dose	9	NA	bleomycin	0	water	19	C	1	DL238	median.TOF	290
1632	20141028	dose	9	NA	bleomycin	0	water	19	C	1	DL238	norm.n	116
1633	20141028	dose	9	NA	bleomycin	25	water	19	C	2	DL238	median.EXT	575
1634	20141028	dose	9	NA	bleomycin	25	water	19	C	2	DL238	median.norm.EXT	2.02110699152542
1635	20141028	dose	9	NA	bleomycin	25	water	19	C	2	DL238	median.TOF	293
1636	20141028	dose	9	NA	bleomycin	25	water	19	C	2	DL238	norm.n	116.666666666667
1637	20141028	dose	9	NA	bleomycin	50	water	19	C	3	DL238	median.EXT	288
1638	20141028	dose	9	NA	bleomycin	50	water	19	C	3	DL238	median.norm.EXT	1.54497354497354
1639	20141028	dose	9	NA	bleomycin	50	water	19	C	3	DL238	median.TOF	175
1640	20141028	dose	9	NA	bleomycin	50	water	19	C	3	DL238	norm.n	117
1641	20141028	dose	9	NA	bleomycin	75	water	19	C	4	DL238	median.EXT	191
1642	20141028	dose	9	NA	bleomycin	75	water	19	C	4	DL238	median.norm.EXT	1.34246575342466
1643	20141028	dose	9	NA	bleomycin	75	water	19	C	4	DL238	median.TOF	138
1644	20141028	dose	9	NA	bleomycin	75	water	19	C	4	DL238	norm.n	115
1645	20141028	dose	9	NA	bleomycin	100	water	19	C	5	DL238	median.EXT	151
1646	20141028	dose	9	NA	bleomycin	100	water	19	C	5	DL238	median.norm.EXT	1.21551724137931
1647	20141028	dose	9	NA	bleomycin	100	water	19	C	5	DL238	median.TOF	113
1648	20141028	dose	9	NA	bleomycin	100	water	19	C	5	DL238	norm.n	101
1649	20141028	dose	9	NA	bleomycin	0	water	19	C	7	N2	median.EXT	552
1650	20141028	dose	9	NA	bleomycin	0	water	19	C	7	N2	median.norm.EXT	2.08363636363636
1651	20141028	dose	9	NA	bleomycin	0	water	19	C	7	N2	median.TOF	264
1652	20141028	dose	9	NA	bleomycin	0	water	19	C	7	N2	norm.n	133
1653	20141028	dose	9	NA	bleomycin	25	water	19	C	8	N2	median.EXT	476.5
1654	20141028	dose	9	NA	bleomycin	25	water	19	C	8	N2	median.norm.EXT	2.03229166666667
1655	20141028	dose	9	NA	bleomycin	25	water	19	C	8	N2	median.TOF	217
1656	20141028	dose	9	NA	bleomycin	25	water	19	C	8	N2	norm.n	126.666666666667
1657	20141028	dose	9	NA	bleomycin	50	water	19	C	9	N2	median.EXT	193
1658	20141028	dose	9	NA	bleomycin	50	water	19	C	9	N2	median.norm.EXT	1.26315789473684
1659	20141028	dose	9	NA	bleomycin	50	water	19	C	9	N2	median.TOF	148
1660	20141028	dose	9	NA	bleomycin	50	water	19	C	9	N2	norm.n	101.333333333333
1661	20141028	dose	9	NA	bleomycin	75	water	19	C	10	N2	median.EXT	104
1662	20141028	dose	9	NA	bleomycin	75	water	19	C	10	N2	median.norm.EXT	1.05050505050505
1663	20141028	dose	9	NA	bleomycin	75	water	19	C	10	N2	median.TOF	102
1664	20141028	dose	9	NA	bleomycin	75	water	19	C	10	N2	norm.n	28.3333333333333
1665	20141028	dose	9	NA	bleomycin	100	water	19	C	11	N2	median.EXT	118
1666	20141028	dose	9	NA	bleomycin	100	water	19	C	11	N2	median.norm.EXT	1.15068493150685
1667	20141028	dose	9	NA	bleomycin	100	water	19	C	11	N2	median.TOF	94
1668	20141028	dose	9	NA	bleomycin	100	water	19	C	11	N2	norm.n	49.6666666666667
1669	20141028	dose	9	NA	bleomycin	0	water	19	D	1	JU258	median.EXT	633
1670	20141028	dose	9	NA	bleomycin	0	water	19	D	1	JU258	median.norm.EXT	2.8032003690199
1671	20141028	dose	9	NA	bleomycin	0	water	19	D	1	JU258	median.TOF	257.5
1672	20141028	dose	9	NA	bleomycin	0	water	19	D	1	JU258	norm.n	106.666666666667
1673	20141028	dose	9	NA	bleomycin	25	water	19	D	2	JU258	median.EXT	526
1674	20141028	dose	9	NA	bleomycin	25	water	19	D	2	JU258	median.norm.EXT	2.33333333333333
1675	20141028	dose	9	NA	bleomycin	25	water	19	D	2	JU258	median.TOF	218
1676	20141028	dose	9	NA	bleomycin	25	water	19	D	2	JU258	norm.n	133
1677	20141028	dose	9	NA	bleomycin	50	water	19	D	3	JU258	median.EXT	261
1678	20141028	dose	9	NA	bleomycin	50	water	19	D	3	JU258	median.norm.EXT	1.6
1679	20141028	dose	9	NA	bleomycin	50	water	19	D	3	JU258	median.TOF	163
1680	20141028	dose	9	NA	bleomycin	50	water	19	D	3	JU258	norm.n	99
1681	20141028	dose	9	NA	bleomycin	75	water	19	D	4	JU258	median.EXT	172
1682	20141028	dose	9	NA	bleomycin	75	water	19	D	4	JU258	median.norm.EXT	1.29510351626684
1683	20141028	dose	9	NA	bleomycin	75	water	19	D	4	JU258	median.TOF	125
1684	20141028	dose	9	NA	bleomycin	75	water	19	D	4	JU258	norm.n	70
1685	20141028	dose	9	NA	bleomycin	100	water	19	D	5	JU258	median.EXT	143
1686	20141028	dose	9	NA	bleomycin	100	water	19	D	5	JU258	median.norm.EXT	1.25019900497512
1687	20141028	dose	9	NA	bleomycin	100	water	19	D	5	JU258	median.TOF	104.5
1688	20141028	dose	9	NA	bleomycin	100	water	19	D	5	JU258	norm.n	72.6666666666667
1689	20141028	dose	9	NA	bleomycin	0	water	19	D	7	CB4856	median.EXT	516
1690	20141028	dose	9	NA	bleomycin	0	water	19	D	7	CB4856	median.norm.EXT	2.02110341415141
1691	20141028	dose	9	NA	bleomycin	0	water	19	D	7	CB4856	median.TOF	235
1692	20141028	dose	9	NA	bleomycin	0	water	19	D	7	CB4856	norm.n	132.666666666667
1693	20141028	dose	9	NA	bleomycin	25	water	19	D	8	CB4856	median.EXT	524.5
1694	20141028	dose	9	NA	bleomycin	25	water	19	D	8	CB4856	median.norm.EXT	2.04557527693857
1695	20141028	dose	9	NA	bleomycin	25	water	19	D	8	CB4856	median.TOF	228
1696	20141028	dose	9	NA	bleomycin	25	water	19	D	8	CB4856	norm.n	138.666666666667
1697	20141028	dose	9	NA	bleomycin	50	water	19	D	9	CB4856	median.EXT	295
1698	20141028	dose	9	NA	bleomycin	50	water	19	D	9	CB4856	median.norm.EXT	1.51299053205394
1699	20141028	dose	9	NA	bleomycin	50	water	19	D	9	CB4856	median.TOF	189
1700	20141028	dose	9	NA	bleomycin	50	water	19	D	9	CB4856	norm.n	106.666666666667
1701	20141028	dose	9	NA	bleomycin	75	water	19	D	10	CB4856	median.EXT	187.5
1702	20141028	dose	9	NA	bleomycin	75	water	19	D	10	CB4856	median.norm.EXT	1.282332046764
1703	20141028	dose	9	NA	bleomycin	75	water	19	D	10	CB4856	median.TOF	142
1704	20141028	dose	9	NA	bleomycin	75	water	19	D	10	CB4856	norm.n	120.666666666667
1705	20141028	dose	9	NA	bleomycin	100	water	19	D	11	CB4856	median.EXT	163.5
1706	20141028	dose	9	NA	bleomycin	100	water	19	D	11	CB4856	median.norm.EXT	1.23649728347715
1707	20141028	dose	9	NA	bleomycin	100	water	19	D	11	CB4856	median.TOF	123.5
1708	20141028	dose	9	NA	bleomycin	100	water	19	D	11	CB4856	norm.n	82.6666666666667
1709	20141028	dose	9	NA	bleomycin	0	water	19	E	1	JU258	median.EXT	690.5
1710	20141028	dose	9	NA	bleomycin	0	water	19	E	1	JU258	median.norm.EXT	2.60258341056534
1711	20141028	dose	9	NA	bleomycin	0	water	19	E	1	JU258	median.TOF	289
1712	20141028	dose	9	NA	bleomycin	0	water	19	E	1	JU258	norm.n	102
1713	20141028	dose	9	NA	bleomycin	25	water	19	E	2	JU258	median.EXT	584.5
1714	20141028	dose	9	NA	bleomycin	25	water	19	E	2	JU258	median.norm.EXT	2.51851851851852
1715	20141028	dose	9	NA	bleomycin	25	water	19	E	2	JU258	median.TOF	246
1716	20141028	dose	9	NA	bleomycin	25	water	19	E	2	JU258	norm.n	136
1717	20141028	dose	9	NA	bleomycin	50	water	19	E	3	JU258	median.EXT	273.5
1718	20141028	dose	9	NA	bleomycin	50	water	19	E	3	JU258	median.norm.EXT	1.65306672830945
1719	20141028	dose	9	NA	bleomycin	50	water	19	E	3	JU258	median.TOF	164
1720	20141028	dose	9	NA	bleomycin	50	water	19	E	3	JU258	norm.n	98
1721	20141028	dose	9	NA	bleomycin	75	water	19	E	4	JU258	median.EXT	191
1722	20141028	dose	9	NA	bleomycin	75	water	19	E	4	JU258	median.norm.EXT	1.35668789808917
1723	20141028	dose	9	NA	bleomycin	75	water	19	E	4	JU258	median.TOF	129
1724	20141028	dose	9	NA	bleomycin	75	water	19	E	4	JU258	norm.n	89.6666666666667
1725	20141028	dose	9	NA	bleomycin	100	water	19	E	5	JU258	median.EXT	152
1726	20141028	dose	9	NA	bleomycin	100	water	19	E	5	JU258	median.norm.EXT	1.24489795918367
1727	20141028	dose	9	NA	bleomycin	100	water	19	E	5	JU258	median.TOF	115
1728	20141028	dose	9	NA	bleomycin	100	water	19	E	5	JU258	norm.n	89
1729	20141028	dose	9	NA	bleomycin	0	water	19	E	7	DL238	median.EXT	556
1730	20141028	dose	9	NA	bleomycin	0	water	19	E	7	DL238	median.norm.EXT	2.00716845878136
1731	20141028	dose	9	NA	bleomycin	0	water	19	E	7	DL238	median.TOF	270
1732	20141028	dose	9	NA	bleomycin	0	water	19	E	7	DL238	norm.n	169.666666666667
1733	20141028	dose	9	NA	bleomycin	25	water	19	E	8	DL238	median.EXT	550
1734	20141028	dose	9	NA	bleomycin	25	water	19	E	8	DL238	median.norm.EXT	2.05696202531646
1735	20141028	dose	9	NA	bleomycin	25	water	19	E	8	DL238	median.TOF	265
1736	20141028	dose	9	NA	bleomycin	25	water	19	E	8	DL238	norm.n	141.666666666667
1737	20141028	dose	9	NA	bleomycin	50	water	19	E	9	DL238	median.EXT	266
1738	20141028	dose	9	NA	bleomycin	50	water	19	E	9	DL238	median.norm.EXT	1.51327433628319
1739	20141028	dose	9	NA	bleomycin	50	water	19	E	9	DL238	median.TOF	176
1740	20141028	dose	9	NA	bleomycin	50	water	19	E	9	DL238	norm.n	111.666666666667
1741	20141028	dose	9	NA	bleomycin	75	water	19	E	10	DL238	median.EXT	198
1742	20141028	dose	9	NA	bleomycin	75	water	19	E	10	DL238	median.norm.EXT	1.33131475266307
1743	20141028	dose	9	NA	bleomycin	75	water	19	E	10	DL238	median.TOF	143
1744	20141028	dose	9	NA	bleomycin	75	water	19	E	10	DL238	norm.n	108.666666666667
1745	20141028	dose	9	NA	bleomycin	100	water	19	E	11	DL238	median.EXT	182.5
1746	20141028	dose	9	NA	bleomycin	100	water	19	E	11	DL238	median.norm.EXT	1.28423645320197
1747	20141028	dose	9	NA	bleomycin	100	water	19	E	11	DL238	median.TOF	136
1748	20141028	dose	9	NA	bleomycin	100	water	19	E	11	DL238	norm.n	115.333333333333
1749	20141028	dose	9	NA	bleomycin	0	water	19	F	1	CB4856	median.EXT	574
1750	20141028	dose	9	NA	bleomycin	0	water	19	F	1	CB4856	median.norm.EXT	2.00812909870523
1751	20141028	dose	9	NA	bleomycin	0	water	19	F	1	CB4856	median.TOF	270
1752	20141028	dose	9	NA	bleomycin	0	water	19	F	1	CB4856	norm.n	134.666666666667
1753	20141028	dose	9	NA	bleomycin	25	water	19	F	2	CB4856	median.EXT	545.5
1754	20141028	dose	9	NA	bleomycin	25	water	19	F	2	CB4856	median.norm.EXT	2.01081656346749
1755	20141028	dose	9	NA	bleomycin	25	water	19	F	2	CB4856	median.TOF	252
1756	20141028	dose	9	NA	bleomycin	25	water	19	F	2	CB4856	norm.n	142
1757	20141028	dose	9	NA	bleomycin	50	water	19	F	3	CB4856	median.EXT	284
1758	20141028	dose	9	NA	bleomycin	50	water	19	F	3	CB4856	median.norm.EXT	1.49561403508772
1759	20141028	dose	9	NA	bleomycin	50	water	19	F	3	CB4856	median.TOF	185
1760	20141028	dose	9	NA	bleomycin	50	water	19	F	3	CB4856	norm.n	139
1761	20141028	dose	9	NA	bleomycin	75	water	19	F	4	CB4856	median.EXT	187
1762	20141028	dose	9	NA	bleomycin	75	water	19	F	4	CB4856	median.norm.EXT	1.25
1763	20141028	dose	9	NA	bleomycin	75	water	19	F	4	CB4856	median.TOF	146
1764	20141028	dose	9	NA	bleomycin	75	water	19	F	4	CB4856	norm.n	121.333333333333
1765	20141028	dose	9	NA	bleomycin	100	water	19	F	5	CB4856	median.EXT	166
1766	20141028	dose	9	NA	bleomycin	100	water	19	F	5	CB4856	median.norm.EXT	1.18390598367274
1767	20141028	dose	9	NA	bleomycin	100	water	19	F	5	CB4856	median.TOF	135
1768	20141028	dose	9	NA	bleomycin	100	water	19	F	5	CB4856	norm.n	108.666666666667
1769	20141028	dose	9	NA	bleomycin	0	water	19	F	7	N2	median.EXT	570.5
1770	20141028	dose	9	NA	bleomycin	0	water	19	F	7	N2	median.norm.EXT	2.12988403211418
1771	20141028	dose	9	NA	bleomycin	0	water	19	F	7	N2	median.TOF	251.5
1772	20141028	dose	9	NA	bleomycin	0	water	19	F	7	N2	norm.n	128
1773	20141028	dose	9	NA	bleomycin	25	water	19	F	8	N2	median.EXT	448
1774	20141028	dose	9	NA	bleomycin	25	water	19	F	8	N2	median.norm.EXT	1.96808149405772
1775	20141028	dose	9	NA	bleomycin	25	water	19	F	8	N2	median.TOF	231.5
1776	20141028	dose	9	NA	bleomycin	25	water	19	F	8	N2	norm.n	141.333333333333
1777	20141028	dose	9	NA	bleomycin	50	water	19	F	9	N2	median.EXT	175
1778	20141028	dose	9	NA	bleomycin	50	water	19	F	9	N2	median.norm.EXT	1.2125
1779	20141028	dose	9	NA	bleomycin	50	water	19	F	9	N2	median.TOF	138
1780	20141028	dose	9	NA	bleomycin	50	water	19	F	9	N2	norm.n	63.6666666666667
1781	20141028	dose	9	NA	bleomycin	75	water	19	F	10	N2	median.EXT	179
1782	20141028	dose	9	NA	bleomycin	75	water	19	F	10	N2	median.norm.EXT	1.45282912108638
1783	20141028	dose	9	NA	bleomycin	75	water	19	F	10	N2	median.TOF	110.5
1784	20141028	dose	9	NA	bleomycin	75	water	19	F	10	N2	norm.n	22.6666666666667
1785	20141028	dose	9	NA	bleomycin	100	water	19	F	11	N2	median.EXT	116
1786	20141028	dose	9	NA	bleomycin	100	water	19	F	11	N2	median.norm.EXT	1.14124293785311
1787	20141028	dose	9	NA	bleomycin	100	water	19	F	11	N2	median.TOF	100
1788	20141028	dose	9	NA	bleomycin	100	water	19	F	11	N2	norm.n	19
1789	20141028	dose	9	NA	bleomycin	0	water	19	G	1	CB4856	median.EXT	567
1790	20141028	dose	9	NA	bleomycin	0	water	19	G	1	CB4856	median.norm.EXT	1.99671052631579
1791	20141028	dose	9	NA	bleomycin	0	water	19	G	1	CB4856	median.TOF	287
1792	20141028	dose	9	NA	bleomycin	0	water	19	G	1	CB4856	norm.n	138.333333333333
1793	20141028	dose	9	NA	bleomycin	25	water	19	G	2	CB4856	median.EXT	577.5
1794	20141028	dose	9	NA	bleomycin	25	water	19	G	2	CB4856	median.norm.EXT	2.03865947291969
1795	20141028	dose	9	NA	bleomycin	25	water	19	G	2	CB4856	median.TOF	270
1796	20141028	dose	9	NA	bleomycin	25	water	19	G	2	CB4856	norm.n	135.333333333333
1797	20141028	dose	9	NA	bleomycin	50	water	19	G	3	CB4856	median.EXT	305
1798	20141028	dose	9	NA	bleomycin	50	water	19	G	3	CB4856	median.norm.EXT	1.50785340314136
1799	20141028	dose	9	NA	bleomycin	50	water	19	G	3	CB4856	median.TOF	198
1800	20141028	dose	9	NA	bleomycin	50	water	19	G	3	CB4856	norm.n	100.333333333333
1801	20141028	dose	9	NA	bleomycin	75	water	19	G	4	CB4856	median.EXT	195
1802	20141028	dose	9	NA	bleomycin	75	water	19	G	4	CB4856	median.norm.EXT	1.28157863641735
1803	20141028	dose	9	NA	bleomycin	75	water	19	G	4	CB4856	median.TOF	148
1804	20141028	dose	9	NA	bleomycin	75	water	19	G	4	CB4856	norm.n	123.333333333333
1805	20141028	dose	9	NA	bleomycin	100	water	19	G	5	CB4856	median.EXT	166
1806	20141028	dose	9	NA	bleomycin	100	water	19	G	5	CB4856	median.norm.EXT	1.2093023255814
1807	20141028	dose	9	NA	bleomycin	100	water	19	G	5	CB4856	median.TOF	130
1808	20141028	dose	9	NA	bleomycin	100	water	19	G	5	CB4856	norm.n	89.6666666666667
1809	20141028	dose	9	NA	bleomycin	0	water	19	G	7	JU258	median.EXT	657
1810	20141028	dose	9	NA	bleomycin	0	water	19	G	7	JU258	median.norm.EXT	2.41741741741742
1811	20141028	dose	9	NA	bleomycin	0	water	19	G	7	JU258	median.TOF	277
1812	20141028	dose	9	NA	bleomycin	0	water	19	G	7	JU258	norm.n	109.666666666667
1813	20141028	dose	9	NA	bleomycin	25	water	19	G	8	JU258	median.EXT	539
1814	20141028	dose	9	NA	bleomycin	25	water	19	G	8	JU258	median.norm.EXT	2.27146445766919
1815	20141028	dose	9	NA	bleomycin	25	water	19	G	8	JU258	median.TOF	224.5
1816	20141028	dose	9	NA	bleomycin	25	water	19	G	8	JU258	norm.n	123.333333333333
1817	20141028	dose	9	NA	bleomycin	50	water	19	G	9	JU258	median.EXT	224
1818	20141028	dose	9	NA	bleomycin	50	water	19	G	9	JU258	median.norm.EXT	1.3921568627451
1819	20141028	dose	9	NA	bleomycin	50	water	19	G	9	JU258	median.TOF	157
1820	20141028	dose	9	NA	bleomycin	50	water	19	G	9	JU258	norm.n	76.3333333333333
1821	20141028	dose	9	NA	bleomycin	75	water	19	G	10	JU258	median.EXT	165
1822	20141028	dose	9	NA	bleomycin	75	water	19	G	10	JU258	median.norm.EXT	1.25100360267627
1823	20141028	dose	9	NA	bleomycin	75	water	19	G	10	JU258	median.TOF	122.5
1824	20141028	dose	9	NA	bleomycin	75	water	19	G	10	JU258	norm.n	71.3333333333333
1825	20141028	dose	9	NA	bleomycin	100	water	19	G	11	JU258	median.EXT	148
1826	20141028	dose	9	NA	bleomycin	100	water	19	G	11	JU258	median.norm.EXT	1.2370396929177
1827	20141028	dose	9	NA	bleomycin	100	water	19	G	11	JU258	median.TOF	113
1828	20141028	dose	9	NA	bleomycin	100	water	19	G	11	JU258	norm.n	77.3333333333333
1829	20141028	dose	9	NA	bleomycin	0	water	19	H	1	N2	median.EXT	587.5
1830	20141028	dose	9	NA	bleomycin	0	water	19	H	1	N2	median.norm.EXT	2.08924778761062
1831	20141028	dose	9	NA	bleomycin	0	water	19	H	1	N2	median.TOF	288
1832	20141028	dose	9	NA	bleomycin	0	water	19	H	1	N2	norm.n	122.666666666667
1833	20141028	dose	9	NA	bleomycin	25	water	19	H	2	N2	median.EXT	570
1834	20141028	dose	9	NA	bleomycin	25	water	19	H	2	N2	median.norm.EXT	1.95348837209302
1835	20141028	dose	9	NA	bleomycin	25	water	19	H	2	N2	median.TOF	283
1836	20141028	dose	9	NA	bleomycin	25	water	19	H	2	N2	norm.n	133.666666666667
1837	20141028	dose	9	NA	bleomycin	50	water	19	H	3	N2	median.EXT	192
1838	20141028	dose	9	NA	bleomycin	50	water	19	H	3	N2	median.norm.EXT	1.25641025641026
1839	20141028	dose	9	NA	bleomycin	50	water	19	H	3	N2	median.TOF	150
1840	20141028	dose	9	NA	bleomycin	50	water	19	H	3	N2	norm.n	72.3333333333333
1841	20141028	dose	9	NA	bleomycin	75	water	19	H	4	N2	median.EXT	144
1842	20141028	dose	9	NA	bleomycin	75	water	19	H	4	N2	median.norm.EXT	1.19782608695652
1843	20141028	dose	9	NA	bleomycin	75	water	19	H	4	N2	median.TOF	107
1844	20141028	dose	9	NA	bleomycin	75	water	19	H	4	N2	norm.n	43.3333333333333
1845	20141028	dose	9	NA	bleomycin	100	water	19	H	5	N2	median.EXT	111
1846	20141028	dose	9	NA	bleomycin	100	water	19	H	5	N2	median.norm.EXT	1.11397373679703
1847	20141028	dose	9	NA	bleomycin	100	water	19	H	5	N2	median.TOF	98
1848	20141028	dose	9	NA	bleomycin	100	water	19	H	5	N2	norm.n	41.3333333333333
1849	20141028	dose	9	NA	bleomycin	0	water	19	H	7	DL238	median.EXT	599
1850	20141028	dose	9	NA	bleomycin	0	water	19	H	7	DL238	median.norm.EXT	1.9968878466794
1851	20141028	dose	9	NA	bleomycin	0	water	19	H	7	DL238	median.TOF	300
1852	20141028	dose	9	NA	bleomycin	0	water	19	H	7	DL238	norm.n	112.666666666667
1853	20141028	dose	9	NA	bleomycin	25	water	19	H	8	DL238	median.EXT	575
1854	20141028	dose	9	NA	bleomycin	25	water	19	H	8	DL238	median.norm.EXT	1.98208955223881
1855	20141028	dose	9	NA	bleomycin	25	water	19	H	8	DL238	median.TOF	285
1856	20141028	dose	9	NA	bleomycin	25	water	19	H	8	DL238	norm.n	135
1857	20141028	dose	9	NA	bleomycin	50	water	19	H	9	DL238	median.EXT	286.5
1858	20141028	dose	9	NA	bleomycin	50	water	19	H	9	DL238	median.norm.EXT	1.54770568021023
1859	20141028	dose	9	NA	bleomycin	50	water	19	H	9	DL238	median.TOF	186
1860	20141028	dose	9	NA	bleomycin	50	water	19	H	9	DL238	norm.n	100.666666666667
1861	20141028	dose	9	NA	bleomycin	75	water	19	H	10	DL238	median.EXT	199
1862	20141028	dose	9	NA	bleomycin	75	water	19	H	10	DL238	median.norm.EXT	1.39240506329114
1863	20141028	dose	9	NA	bleomycin	75	water	19	H	10	DL238	median.TOF	133
1864	20141028	dose	9	NA	bleomycin	75	water	19	H	10	DL238	norm.n	101.666666666667
1865	20141028	dose	9	NA	bleomycin	100	water	19	H	11	DL238	median.EXT	174
1866	20141028	dose	9	NA	bleomycin	100	water	19	H	11	DL238	median.norm.EXT	1.24657534246575
1867	20141028	dose	9	NA	bleomycin	100	water	19	H	11	DL238	median.TOF	131
1868	20141028	dose	9	NA	bleomycin	100	water	19	H	11	DL238	norm.n	111.666666666667
1869	20141028	dose	9	NA	puromycin	0	water	20	A	1	N2	median.EXT	449
1870	20141028	dose	9	NA	puromycin	0	water	20	A	1	N2	median.norm.EXT	2.22222222222222
1871	20141028	dose	9	NA	puromycin	0	water	20	A	1	N2	median.TOF	181
1872	20141028	dose	9	NA	puromycin	0	water	20	A	1	N2	norm.n	143.666666666667
1873	20141028	dose	9	NA	puromycin	125	water	20	A	2	N2	median.EXT	538.5
1874	20141028	dose	9	NA	puromycin	125	water	20	A	2	N2	median.norm.EXT	2.49307359307359
1875	20141028	dose	9	NA	puromycin	125	water	20	A	2	N2	median.TOF	223
1876	20141028	dose	9	NA	puromycin	125	water	20	A	2	N2	norm.n	126
1877	20141028	dose	9	NA	puromycin	250	water	20	A	3	N2	median.EXT	502
1878	20141028	dose	9	NA	puromycin	250	water	20	A	3	N2	median.norm.EXT	2.27642276422764
1879	20141028	dose	9	NA	puromycin	250	water	20	A	3	N2	median.TOF	205
1880	20141028	dose	9	NA	puromycin	250	water	20	A	3	N2	norm.n	133.666666666667
1881	20141028	dose	9	NA	puromycin	500	water	20	A	4	N2	median.EXT	410
1882	20141028	dose	9	NA	puromycin	500	water	20	A	4	N2	median.norm.EXT	2.06521739130435
1883	20141028	dose	9	NA	puromycin	500	water	20	A	4	N2	median.TOF	172
1884	20141028	dose	9	NA	puromycin	500	water	20	A	4	N2	norm.n	89.6666666666667
1885	20141028	dose	9	NA	puromycin	1000	water	20	A	5	N2	median.EXT	122
1886	20141028	dose	9	NA	puromycin	1000	water	20	A	5	N2	median.norm.EXT	1.09876543209877
1887	20141028	dose	9	NA	puromycin	1000	water	20	A	5	N2	median.TOF	110
1888	20141028	dose	9	NA	puromycin	1000	water	20	A	5	N2	norm.n	49
1889	20141028	dose	9	NA	puromycin	0	water	20	A	7	CB4856	median.EXT	536
1890	20141028	dose	9	NA	puromycin	0	water	20	A	7	CB4856	median.norm.EXT	2.24619289340102
1891	20141028	dose	9	NA	puromycin	0	water	20	A	7	CB4856	median.TOF	219
1892	20141028	dose	9	NA	puromycin	0	water	20	A	7	CB4856	norm.n	127.5
1893	20141028	dose	9	NA	puromycin	125	water	20	A	8	CB4856	median.EXT	555
1894	20141028	dose	9	NA	puromycin	125	water	20	A	8	CB4856	median.norm.EXT	2.22335025380711
1895	20141028	dose	9	NA	puromycin	125	water	20	A	8	CB4856	median.TOF	258
1896	20141028	dose	9	NA	puromycin	125	water	20	A	8	CB4856	norm.n	133
1897	20141028	dose	9	NA	puromycin	250	water	20	A	9	CB4856	median.EXT	508
1898	20141028	dose	9	NA	puromycin	250	water	20	A	9	CB4856	median.norm.EXT	2.06593406593407
1899	20141028	dose	9	NA	puromycin	250	water	20	A	9	CB4856	median.TOF	235
1900	20141028	dose	9	NA	puromycin	250	water	20	A	9	CB4856	norm.n	140.333333333333
1901	20141028	dose	9	NA	puromycin	500	water	20	A	10	CB4856	median.EXT	443
1902	20141028	dose	9	NA	puromycin	500	water	20	A	10	CB4856	median.norm.EXT	2.4020618556701
1903	20141028	dose	9	NA	puromycin	500	water	20	A	10	CB4856	median.TOF	186
1904	20141028	dose	9	NA	puromycin	500	water	20	A	10	CB4856	norm.n	75
1905	20141028	dose	9	NA	puromycin	1000	water	20	A	11	CB4856	median.EXT	126
1906	20141028	dose	9	NA	puromycin	1000	water	20	A	11	CB4856	median.norm.EXT	1.15874015748031
1907	20141028	dose	9	NA	puromycin	1000	water	20	A	11	CB4856	median.TOF	110.5
1908	20141028	dose	9	NA	puromycin	1000	water	20	A	11	CB4856	norm.n	84
1909	20141028	dose	9	NA	puromycin	0	water	20	B	1	DL238	median.EXT	563
1910	20141028	dose	9	NA	puromycin	0	water	20	B	1	DL238	median.norm.EXT	2.0766711833785
1911	20141028	dose	9	NA	puromycin	0	water	20	B	1	DL238	median.TOF	273.5
1912	20141028	dose	9	NA	puromycin	0	water	20	B	1	DL238	norm.n	130
1913	20141028	dose	9	NA	puromycin	125	water	20	B	2	DL238	median.EXT	599
1914	20141028	dose	9	NA	puromycin	125	water	20	B	2	DL238	median.norm.EXT	2.36551724137931
1915	20141028	dose	9	NA	puromycin	125	water	20	B	2	DL238	median.TOF	281
1916	20141028	dose	9	NA	puromycin	125	water	20	B	2	DL238	norm.n	119
1917	20141028	dose	9	NA	puromycin	250	water	20	B	3	DL238	median.EXT	584
1918	20141028	dose	9	NA	puromycin	250	water	20	B	3	DL238	median.norm.EXT	2.33526011560694
1919	20141028	dose	9	NA	puromycin	250	water	20	B	3	DL238	median.TOF	279
1920	20141028	dose	9	NA	puromycin	250	water	20	B	3	DL238	norm.n	119
1921	20141028	dose	9	NA	puromycin	500	water	20	B	4	DL238	median.EXT	571
1922	20141028	dose	9	NA	puromycin	500	water	20	B	4	DL238	median.norm.EXT	2.06787878787879
1923	20141028	dose	9	NA	puromycin	500	water	20	B	4	DL238	median.TOF	270
1924	20141028	dose	9	NA	puromycin	500	water	20	B	4	DL238	norm.n	125.333333333333
1925	20141028	dose	9	NA	puromycin	1000	water	20	B	5	DL238	median.EXT	293
1926	20141028	dose	9	NA	puromycin	1000	water	20	B	5	DL238	median.norm.EXT	1.60655737704918
1927	20141028	dose	9	NA	puromycin	1000	water	20	B	5	DL238	median.TOF	178
1928	20141028	dose	9	NA	puromycin	1000	water	20	B	5	DL238	norm.n	109.666666666667
1929	20141028	dose	9	NA	puromycin	0	water	20	B	7	JU258	median.EXT	764
1930	20141028	dose	9	NA	puromycin	0	water	20	B	7	JU258	median.norm.EXT	2.85080864462573
1931	20141028	dose	9	NA	puromycin	0	water	20	B	7	JU258	median.TOF	280.5
1932	20141028	dose	9	NA	puromycin	0	water	20	B	7	JU258	norm.n	87.3333333333333
1933	20141028	dose	9	NA	puromycin	125	water	20	B	8	JU258	median.EXT	603.5
1934	20141028	dose	9	NA	puromycin	125	water	20	B	8	JU258	median.norm.EXT	2.69043160977483
1935	20141028	dose	9	NA	puromycin	125	water	20	B	8	JU258	median.TOF	235.5
1936	20141028	dose	9	NA	puromycin	125	water	20	B	8	JU258	norm.n	112.666666666667
1937	20141028	dose	9	NA	puromycin	250	water	20	B	9	JU258	median.EXT	540
1938	20141028	dose	9	NA	puromycin	250	water	20	B	9	JU258	median.norm.EXT	2.53962351847548
1939	20141028	dose	9	NA	puromycin	250	water	20	B	9	JU258	median.TOF	217
1940	20141028	dose	9	NA	puromycin	250	water	20	B	9	JU258	norm.n	117.333333333333
1941	20141028	dose	9	NA	puromycin	500	water	20	B	10	JU258	median.EXT	311
1942	20141028	dose	9	NA	puromycin	500	water	20	B	10	JU258	median.norm.EXT	1.73461538461538
1943	20141028	dose	9	NA	puromycin	500	water	20	B	10	JU258	median.TOF	169
1944	20141028	dose	9	NA	puromycin	500	water	20	B	10	JU258	norm.n	93.6666666666667
1945	20141028	dose	9	NA	puromycin	1000	water	20	B	11	JU258	median.EXT	109
1946	20141028	dose	9	NA	puromycin	1000	water	20	B	11	JU258	median.norm.EXT	1.10696948682386
1947	20141028	dose	9	NA	puromycin	1000	water	20	B	11	JU258	median.TOF	94.5
1948	20141028	dose	9	NA	puromycin	1000	water	20	B	11	JU258	norm.n	45.3333333333333
1949	20141028	dose	9	NA	puromycin	0	water	20	C	1	DL238	median.EXT	576
1950	20141028	dose	9	NA	puromycin	0	water	20	C	1	DL238	median.norm.EXT	1.98991525423729
1951	20141028	dose	9	NA	puromycin	0	water	20	C	1	DL238	median.TOF	288.5
1952	20141028	dose	9	NA	puromycin	0	water	20	C	1	DL238	norm.n	126
1953	20141028	dose	9	NA	puromycin	125	water	20	C	2	DL238	median.EXT	585.5
1954	20141028	dose	9	NA	puromycin	125	water	20	C	2	DL238	median.norm.EXT	2.03715312724659
1955	20141028	dose	9	NA	puromycin	125	water	20	C	2	DL238	median.TOF	283.5
1956	20141028	dose	9	NA	puromycin	125	water	20	C	2	DL238	norm.n	130
1957	20141028	dose	9	NA	puromycin	250	water	20	C	3	DL238	median.EXT	583.5
1958	20141028	dose	9	NA	puromycin	250	water	20	C	3	DL238	median.norm.EXT	2.0318195113171
1959	20141028	dose	9	NA	puromycin	250	water	20	C	3	DL238	median.TOF	279.5
1960	20141028	dose	9	NA	puromycin	250	water	20	C	3	DL238	norm.n	139.333333333333
1961	20141028	dose	9	NA	puromycin	500	water	20	C	4	DL238	median.EXT	574
1962	20141028	dose	9	NA	puromycin	500	water	20	C	4	DL238	median.norm.EXT	2.04713804713805
1963	20141028	dose	9	NA	puromycin	500	water	20	C	4	DL238	median.TOF	279
1964	20141028	dose	9	NA	puromycin	500	water	20	C	4	DL238	norm.n	122.333333333333
1965	20141028	dose	9	NA	puromycin	1000	water	20	C	5	DL238	median.EXT	292
1966	20141028	dose	9	NA	puromycin	1000	water	20	C	5	DL238	median.norm.EXT	1.58563535911602
1967	20141028	dose	9	NA	puromycin	1000	water	20	C	5	DL238	median.TOF	180
1968	20141028	dose	9	NA	puromycin	1000	water	20	C	5	DL238	norm.n	125.666666666667
1969	20141028	dose	9	NA	puromycin	0	water	20	C	7	N2	median.EXT	558
1970	20141028	dose	9	NA	puromycin	0	water	20	C	7	N2	median.norm.EXT	2.11730158730159
1971	20141028	dose	9	NA	puromycin	0	water	20	C	7	N2	median.TOF	257
1972	20141028	dose	9	NA	puromycin	0	water	20	C	7	N2	norm.n	126.666666666667
1973	20141028	dose	9	NA	puromycin	125	water	20	C	8	N2	median.EXT	515
1974	20141028	dose	9	NA	puromycin	125	water	20	C	8	N2	median.norm.EXT	2.09401709401709
1975	20141028	dose	9	NA	puromycin	125	water	20	C	8	N2	median.TOF	228
1976	20141028	dose	9	NA	puromycin	125	water	20	C	8	N2	norm.n	127
1977	20141028	dose	9	NA	puromycin	250	water	20	C	9	N2	median.EXT	506.5
1978	20141028	dose	9	NA	puromycin	250	water	20	C	9	N2	median.norm.EXT	2.10902134895145
1979	20141028	dose	9	NA	puromycin	250	water	20	C	9	N2	median.TOF	223
1980	20141028	dose	9	NA	puromycin	250	water	20	C	9	N2	norm.n	119.333333333333
1981	20141028	dose	9	NA	puromycin	500	water	20	C	10	N2	median.EXT	257
1982	20141028	dose	9	NA	puromycin	500	water	20	C	10	N2	median.norm.EXT	1.44761904761905
1983	20141028	dose	9	NA	puromycin	500	water	20	C	10	N2	median.TOF	177
1984	20141028	dose	9	NA	puromycin	500	water	20	C	10	N2	norm.n	122.333333333333
1985	20141028	dose	9	NA	puromycin	1000	water	20	C	11	N2	median.EXT	138
1986	20141028	dose	9	NA	puromycin	1000	water	20	C	11	N2	median.norm.EXT	1.18620689655172
1987	20141028	dose	9	NA	puromycin	1000	water	20	C	11	N2	median.TOF	112
1988	20141028	dose	9	NA	puromycin	1000	water	20	C	11	N2	norm.n	37
1989	20141028	dose	9	NA	puromycin	0	water	20	D	1	JU258	median.EXT	819
1990	20141028	dose	9	NA	puromycin	0	water	20	D	1	JU258	median.norm.EXT	3.00229357798165
1991	20141028	dose	9	NA	puromycin	0	water	20	D	1	JU258	median.TOF	292
1992	20141028	dose	9	NA	puromycin	0	water	20	D	1	JU258	norm.n	79.6666666666667
1993	20141028	dose	9	NA	puromycin	125	water	20	D	2	JU258	median.EXT	747
1994	20141028	dose	9	NA	puromycin	125	water	20	D	2	JU258	median.norm.EXT	2.85227272727273
1995	20141028	dose	9	NA	puromycin	125	water	20	D	2	JU258	median.TOF	280
1996	20141028	dose	9	NA	puromycin	125	water	20	D	2	JU258	norm.n	94.3333333333333
1997	20141028	dose	9	NA	puromycin	250	water	20	D	3	JU258	median.EXT	570
1998	20141028	dose	9	NA	puromycin	250	water	20	D	3	JU258	median.norm.EXT	2.69005847953216
1999	20141028	dose	9	NA	puromycin	250	water	20	D	3	JU258	median.TOF	218
[truncated: 493 more rows]
